# Supplementary material for: Dissection of the Transformation of Primary Human Hematopoietic Cells by the Oncogene NUP98-HOXA9
Source: PubMed Central journal article supplement (PMC2725295; doi:10.1371/journal.pone.0006719), 2009-08-21
Supplement: pone.0006719.s001.pdf [file pone.0006719.s001.pdf]

**Table S1.** Early NUP98-HOXA9 target genes in K562 cells identified by microarray analysis

| <b>Gene Symbol</b> | <b>Fold Change</b> | <b>Accession Number</b> | <b>RT-PCR</b> |
|--------------------|--------------------|-------------------------|---------------|
| KBTBD10            | 6.83               | NM_006063               | 4.3           |
| HOXB6              | 3.38               | NM_018952.4             | 2.3           |
| PLN                | 3.26               | NM_002667.2             | 3.2           |
| HPGD               | 2.94               | J05594.1                | 2.9           |
| HOXC6              | 2.83               | NM_004503.3             | 2.7           |
| DHRS9              | 2.55               | AF240698.1              |               |
| CDKN2C             | 2.32               | U17074.1                |               |
| EREG               | 2.32               | NM_001432.2             |               |
| SGK                | 2.22               | NM_005627.3             |               |
| FLJ21918           | 2.15               | NM_024939.2             |               |
| ATP1B1             | 2.07               | BC000006.2              |               |
| ZFPM2              | 2.00               | NM_012082.2             |               |
| VMP1               | -2.00              | NM_030938.2             |               |
| PHLDA1             | -2.00              | NM_007350.3             |               |
| USP53              | -2.00              | NM_019050.2             |               |
| ATF3               | -2.07              | AB066566.1              |               |
| CDKN1A             | -2.07              | NM_000389.2             |               |
| DUSP1              | -2.14              | NM_004417.2             |               |
| KLF6               | -2.15              | AB017493.1              |               |
| COL1A1             | -2.23              | NM_000088.3             |               |
| AREG               | -2.39              | NM_001657               |               |
| JUN                | -2.55              | NM_002228.3             | -2.4          |
| SERPINE1           | -2.93              | NM_000602.1             | -3.3          |
| LOC387763          | -3.88              | XM_941665.2             |               |
