# Supplementary material for: Dissection of the Transformation of Primary Human Hematopoietic Cells by the Oncogene NUP98-HOXA9
Source: PubMed Central journal article supplement (PMC2725295; doi:10.1371/journal.pone.0006719), 2009-08-21
Supplement: pone.0006719.s002.pdf [file pone.0006719.s002.pdf]

**Table S2. Genes dysregulated by NUP98-HOXA9**

| Probeset I.D. | Fold Change |        | Gene Name                                                                                 | Accession Number                                                              | Gene Symbol |
|---------------|-------------|--------|-------------------------------------------------------------------------------------------|-------------------------------------------------------------------------------|-------------|
|               | Exp.1       | Exp.2  |                                                                                           |                                                                               |             |
| 227449_at     | 212.00      | 9.03   | <i>EPH receptor A4</i>                                                                    | NM_004438                                                                     | EPHA4       |
| 204533_at     | 140.19      | 21.16  | <i>chemokine (C-X-C motif) ligand 10</i>                                                  | NM_001565                                                                     | CXCL10      |
| 206367_at     | 124.48      | 191.00 | <i>renin</i>                                                                              | NM_000537                                                                     | REN         |
| 205552_s_at   | 104.89      | 122.91 | <i>2',5'-oligoadenylate</i>                                                               | NM_001032409                                                                  | OAS1        |
| 206987_x_at   | 71.84       | 7.09   | <i>fibroblast growth factor 18</i>                                                        | NM_003862                                                                     | FGF18       |
| 203153_at     | 60.32       | 238.44 | <i>interferon-induced protein with tetratricopeptide repeats 1</i>                        | NM_001001887                                                                  | IFIT1       |
| 204439_at     | 56.10       | 150.47 | <i>interferon-induced protein 44-like</i>                                                 | NM_006820                                                                     | IFI44L      |
| 202086_at     | 52.00       | 135.85 | <i>myxovirus (influenza virus) resistance 1, interferon-inducible protein p78 (mouse)</i> | NM_002462                                                                     | MX1         |
| 202411_at     | 50.80       | 92.80  | <i>interferon, alpha-inducible protein 27</i>                                             | NM_005532                                                                     | IFI27       |
| 202869_at     | 50.34       | 16.96  | <i>2',5'-oligoadenylate</i>                                                               | NM_001032409                                                                  | OAS1        |
| 205984_at     | 46.65       | 14.70  | <i>corticotropin releasing hormone binding protein</i>                                    | NM_001882                                                                     | CRHBP       |
| 212077_at     | 42.42       | 7.22   | <i>caldesmon 1</i>                                                                        | NM_004342 ///<br>NM_033138 ///<br>NM_033139 ///<br>NM_033140 ///<br>NM_033157 | CALD1       |
| 228230_at     | 31.51       | 3.14   |                                                                                           | NM_001037335<br>/// NM_033405                                                 |             |
| 236892_s_at   | 29.82       | 14.48  |                                                                                           |                                                                               |             |
| 229057_at     | 28.67       | 5.40   | <i>sodium channel, voltage-gated, type II, alpha subunit</i>                              | NM_001040142<br>///<br>NM_001040143<br>/// NM_021007                          | SCN2A       |
| 229441_at     | 23.28       | 7.62   | <i>protease, serine, 23</i>                                                               | NM_007173                                                                     | PRSS23      |
| 219932_at     | 21.22       | 7.49   | <i>solute carrier family 27 (fatty acid transporter), member 6</i>                        | NM_001017372<br>/// NM_014031                                                 | SLC27A6     |
| 237261_at     | 20.81       | 2.91   |                                                                                           |                                                                               |             |
| 1554601_at    | 19.96       | 1.97   | <i>Na<sup>+</sup>/K<sup>+</sup> transporting</i>                                          | NM_001040214                                                                  | NKAIN2      |
| 207161_at     | 18.84       | 7.35   | <i>KIAA0087</i>                                                                           |                                                                               | KIAA0087    |
| 234563_at     | 18.25       | 52.51  | <i>phosphodiesterase 3A, cGMP-inhibited</i>                                               | NM_000921                                                                     | PDE3A       |
| 210029_at     | 17.58       | 7.44   | <i>indoleamine-pyrrole 2,3 dioxygenase</i>                                                | NM_002164                                                                     | INDO        |

|             |       |        |                                                                                                    |                                                              |         |
|-------------|-------|--------|----------------------------------------------------------------------------------------------------|--------------------------------------------------------------|---------|
| 220117_at   | 17.24 | 3.97   | zinc finger protein 385D                                                                           | NM_024697                                                    | ZNF385D |
| 237496_at   | 17.12 | 7.66   | 3'-phosphoadenosine 5'-phosphosulfate synthase 2                                                   | NM_001015880<br>/// NM_004670                                | PAPSS2  |
| 213268_at   | 16.98 | 3.80   | calmodulin binding                                                                                 | NM_015215                                                    | CAMTA1  |
| 239979_at   | 16.30 | 9.48   | epithelial stromal interaction 1 (breast)                                                          | NM_001002264<br>/// NM_033255                                | EPSTI1  |
| 242002_at   | 15.42 | 8.17   | Na <sup>+</sup> /K <sup>+</sup> transporting interleukin 5 (colony-stimulating factor, eosinophil) | NM_001040214                                                 | NKAIN2  |
| 207952_at   | 15.15 | 156.82 |                                                                                                    | NM_000879                                                    | IL5     |
| 208425_s_at | 14.28 | 3.27   | tetratricopeptide repeat, ankyrin repeat and coiled-coil containing 2                              | XM_371074 ///<br>XM_934927 ///<br>XM_942334 ///<br>XM_945909 | TANC2   |
| 214059_at   | 14.26 | 9.51   | interferon-induced protein 44                                                                      | NM_006417                                                    | IFI44   |
| 226279_at   | 13.88 | 6.69   | protease, serine, 23                                                                               | NM_007173                                                    | PRSS23  |
| 204415_at   | 13.82 | 15.87  | interferon, alpha-inducible protein 6                                                              | NM_002038 ///<br>NM_022872 ///<br>NM_022873                  | IFI6    |
| 229450_at   | 13.39 | 15.27  |                                                                                                    |                                                              |         |
| 226757_at   | 12.87 | 23.19  | interferon-induced protein with tetratricopeptide repeats 2                                        | NM_001547                                                    | IFIT2   |
| 205483_s_at | 12.67 | 17.73  | ISG15 ubiquitin-like modifier                                                                      | NM_005101                                                    | ISG15   |
| 204747_at   | 12.61 | 18.14  | interferon-induced protein with tetratricopeptide repeats 3                                        | NM_001031683<br>/// NM_001549                                | IFIT3   |
| 227609_at   | 12.11 | 12.33  | epithelial stromal interaction 1 (breast)                                                          | NM_001002264<br>/// NM_033255                                | EPSTI1  |
| 236407_at   | 11.73 | 2.82   | potassium voltage-gated channel, Isk-related family, member 1                                      | NM_000219                                                    | KCNE1   |
| 214453_s_at | 11.45 | 11.09  | interferon-induced protein 44                                                                      | NM_006417                                                    | IFI44   |
| 1567878_at  | 11.38 | 12.00  | defensin, beta 114                                                                                 | NM_001037499                                                 | DEFB114 |
| 205694_at   | 11.22 | 6.67   | tyrosinase-related protein 1                                                                       | NM_000550                                                    | TYRP1   |
| 235276_at   | 10.93 | 18.15  |                                                                                                    |                                                              |         |
| 221349_at   | 10.77 | 5.16   | pre-B lymphocyte gene 1                                                                            | NM_007128                                                    | VPREB1  |
| 242528_at   | 10.56 | 1.78   |                                                                                                    | XM_929330 ///<br>XM_939041                                   |         |

|             |       |       |                                                   |                                                                             |        |
|-------------|-------|-------|---------------------------------------------------|-----------------------------------------------------------------------------|--------|
| 208436_s_at | 10.32 | 11.99 | interferon regulatory factor 7                    | NM_001572 ///<br>NM_004029 ///<br>NM_004031                                 | IRF7   |
| 1556209_at  | 10.17 | 3.92  | C-type lectin domain family 2, member B           | NM_005127                                                                   | CLEC2B |
| 242625_at   | 9.96  | 5.78  | radical S-adenosyl methionine domain containing 2 | NM_080657                                                                   | RSAD2  |
| 204972_at   | 9.91  | 19.67 | 2'-5'-oligoadenylate                              | NM_001032731                                                                | OAS2   |
| 240561_at   | 9.66  | 2.01  | muscleblind-like 3 (Drosophila)                   | NM_018388 ///<br>NM_133486                                                  | MBNL3  |
| 228507_at   | 9.52  | 6.67  | 2'-5'-oligoadenylate                              | NM_003733 ///                                                               | OASL   |
| 205660_at   | 9.33  | 8.59  | synthetase-like                                   | NM_198213                                                                   |        |
| 218400_at   | 9.11  | 10.49 | 2'-5'-oligoadenylate synthetase 3, 100kDa         | NM_006187                                                                   | OAS3   |
| 207836_s_at | 9.03  | 6.66  | RNA binding protein with multiple splicing        | NM_001008710<br>///<br>NM_001008711<br>///<br>NM_001008712<br>/// NM_006867 | RBPMS  |
| 228617_at   | 8.85  | 8.59  | XIAP associated factor 1                          | NM_017523 ///<br>NM_199139                                                  | XAF1   |
| 213797_at   | 8.37  | 7.69  | radical S-adenosyl methionine domain containing 2 | NM_080657                                                                   | RSAD2  |
| 211597_s_at | 8.19  | 7.84  | HOP homeobox                                      | NM_032495 ///<br>NM_139211 ///<br>NM_139212                                 | HOPX   |
| 215571_at   | 8.09  | 30.60 | neural cell adhesion molecule 2                   | NM_004540                                                                   | NCAM2  |
| 241897_at   | 8.02  | 8.22  | RNA binding protein with multiple splicing        | NM_001008710<br>///<br>NM_001008711<br>///<br>NM_001008712<br>/// NM_006867 | RBPMS  |
| 209487_at   | 7.73  | 6.83  | RNA binding protein with multiple splicing        | NM_001008710<br>///<br>NM_001008711<br>///<br>NM_001008712<br>/// NM_006867 | RBPMS  |
| 219737_s_at | 7.71  | 3.74  | protocadherin 9                                   | NM_020403 ///<br>NM_203487                                                  | PCDH9  |
| 212097_at   | 7.64  | 2.40  | caveolin 1, caveolae protein, 22kDa               | NM_001753                                                                   | CAV1   |
| 232979_at   | 7.56  | 3.22  | homeobox B6                                       | NM_018952                                                                   | HOXB6  |

|              |      |       |                                                                                  |                                                              |                  |
|--------------|------|-------|----------------------------------------------------------------------------------|--------------------------------------------------------------|------------------|
| 210797_s_at  | 7.50 | 6.66  | 2'-5'-oligoadenylate synthetase-like                                             | NM_003733 ///<br>NM_198213                                   | OASL             |
| 205844_at    | 7.23 | 6.68  | vanin 1                                                                          | NM_004666                                                    | VNN1             |
| 209498_at    | 7.14 | 2.08  | carcinoembryonic antigen-related cell adhesion molecule 1 (biliary glycoprotein) | NM_001024912<br>/// NM_001712                                | CEACAM1          |
| 220784_s_at  | 7.11 | 56.99 | urotensin 2                                                                      | NM_006786 ///<br>NM_021995                                   | UTS2             |
| 230047_at    | 6.98 | 1.78  |                                                                                  | XM_370651 ///<br>XM_925815 ///<br>XM_937450 ///<br>XM_943308 |                  |
| 205572_at    | 6.94 | 18.60 | angiopoietin 2                                                                   | NM_001147                                                    | ANGPT2           |
| 238919_at    | 6.93 | 3.47  | protocadherin 9                                                                  | NM_020403 ///<br>NM_203487                                   | PCDH9            |
| 235521_at    | 6.89 | 4.60  | homeobox A3                                                                      | NM_030661 ///<br>NM_153631 ///<br>NM_153632                  | HOXA3            |
| 213183_s_at  | 6.87 | 1.92  | cyclin-dependent kinase inhibitor 1C (p57, Kip2)                                 | NM_000076                                                    | CDKN1C           |
| 243342_at    | 6.81 | 6.15  | inositol 1,4,5-<br>interferon induced<br>transmembrane protein 2<br>(1-8D)       | NM_002223<br>NM_003641                                       | ITPR2<br>IFITM2  |
| 219677_at    | 6.53 | 2.35  | splA/ryanodine receptor domain and SOCS box containing 1                         | NM_025106                                                    | SPSB1            |
| 237058_x_at  | 6.47 | 6.46  | solute carrier family 6 (neurotransmitter transporter, GABA), member 13          | NM_016615                                                    | SLC6A13          |
| 32128_at     | 6.19 | 5.79  | chemokine (C-C motif) ligand 18 (pulmonary and activation-regulated)             | NM_002988                                                    | CCL18            |
| 243271_at    | 6.12 | 6.15  | sterile alpha motif protease, serine, 23                                         | NM_152703<br>NM_007173                                       | SAMD9L<br>PRSS23 |
| 202458_at    | 6.09 | 4.43  | cysteine-rich secretory protein 3                                                | NM_006061                                                    | CRISP3           |
| 215071_s_at  | 5.95 | 6.67  | histone cluster 1, H2ac                                                          | NM_003512                                                    | HIST1H2AC        |
| 204994_at    | 5.94 | 9.53  | myxovirus (influenza virus) resistance 2 (mouse)                                 | NM_002463                                                    | MX2              |
| 242234_at    | 5.94 | 6.74  | XIAP associated factor 1                                                         | NM_017523 ///<br>NM_199139                                   | XAF1             |
| 233072_at    | 5.93 | 2.42  | netrin G2                                                                        | NM_032536                                                    | NTNG2            |
| 237009_at    | 5.90 | 4.51  | CD69 molecule                                                                    | NM_001781                                                    | CD69             |
| 213369_at    | 5.89 | 2.62  | protocadherin 21                                                                 | NM_033100                                                    | PCDH21           |
| 1554524_a_at | 5.85 | 2.79  | olfactomedin 3                                                                   | NM_058170                                                    | OLFM3            |

|             |      |       |                                                                        |                                                                                                |         |
|-------------|------|-------|------------------------------------------------------------------------|------------------------------------------------------------------------------------------------|---------|
| 216020_at   | 5.80 | 3.76  | <i>interferon induced with helicase C domain 1</i>                     | NM_022168                                                                                      | IFIH1   |
| 205513_at   | 5.76 | 5.11  | <i>transcobalamin I (vitamin B12 binding protein, R binder family)</i> | NM_001062                                                                                      | TCN1    |
| 209795_at   | 5.74 | 4.45  | <i>CD69 molecule</i>                                                   | NM_001781                                                                                      | CD69    |
| 233944_at   | 5.69 | 9.30  | <i>contactin associated protein-like 2</i>                             | NM_014141                                                                                      | CNTNAP2 |
| 230036_at   | 5.66 | 5.98  | <i>sterile alpha motif ubiquitin specific peptidase 18</i>             | NM_152703                                                                                      | SAMD9L  |
| 219211_at   | 5.62 | 12.48 |                                                                        | NM_017414                                                                                      | USP18   |
| 209488_s_at | 5.57 | 5.59  | <i>RNA binding protein with multiple splicing</i>                      | NM_001008710<br>///<br>NM_001008711<br>///<br>NM_001008712<br>///<br>NM_006867                 | RBPM5   |
| 208557_at   | 5.56 | 2.46  | <i>homeobox A6</i>                                                     | NM_024014                                                                                      | HOXA6   |
| 226145_s_at | 5.53 | 8.92  | <i>Fraser syndrome 1</i>                                               | NM_025074                                                                                      | FRAS1   |
| 214341_at   | 5.43 | 3.15  | <i>adaptor-related protein complex 1, gamma 2 subunit</i>              | NM_003917 ///<br>NM_080545                                                                     | AP1G2   |
| 206382_s_at | 5.22 | 9.88  | <i>brain-derived neurotrophic factor</i>                               | NM_001709 ///<br>NM_170731 ///<br>NM_170732 ///<br>NM_170733 ///<br>NM_170734 ///<br>NM_170735 | BDNF    |
| 213348_at   | 5.22 | 3.61  | <i>cyclin-dependent kinase inhibitor 1C (p57, Kip2)</i>                | NM_000076                                                                                      | CDKN1C  |
| 228708_at   | 5.22 | 2.40  | <i>RAB27B, member RAS oncogene family</i>                              | NM_004163                                                                                      | RAB27B  |
| 236300_at   | 5.22 | 7.49  |                                                                        |                                                                                                |         |
| 204684_at   | 5.21 | 1.90  | <i>neuronal pentraxin I</i>                                            | NM_002522                                                                                      | NPTX1   |
| 205749_at   | 5.18 | 6.53  | <i>cytochrome P450, family 1, subfamily A, polypeptide 1</i>           | NM_000499                                                                                      | CYP1A1  |
| 206133_at   | 5.11 | 5.50  | <i>XIAP associated factor 1</i>                                        | NM_017523 ///<br>NM_199139                                                                     | XAF1    |
| 230383_x_at | 5.07 | 5.49  |                                                                        |                                                                                                |         |
| 226725_at   | 5.06 | 4.28  |                                                                        |                                                                                                |         |
| 232252_at   | 5.02 | 1.99  | <i>dual specificity phosphatase 27 (putative)</i>                      | XM_043739 ///<br>XM_935434 ///<br>XM_935435 ///<br>XM_942428 ///<br>XM_945966 ///<br>XM_945967 | DUSP27  |
| 231804_at   | 5.02 | 1.74  | <i>relaxin/insulin-like family</i>                                     | NM_021634                                                                                      | RXFP1   |
| 213844_at   | 5.00 | 4.38  | <i>homeobox A5</i>                                                     | NM_019102                                                                                      | HOXA5   |

|                    |      |       |                                                                      |                                                                                                                                                                |        |
|--------------------|------|-------|----------------------------------------------------------------------|----------------------------------------------------------------------------------------------------------------------------------------------------------------|--------|
| 206655_s_at        | 4.98 | 1.89  | glycoprotein Ib (platelet),<br>beta polypeptide                      | NM_000407 ///<br>NM_002688                                                                                                                                     | GP1BB  |
| 216215_s_at        | 4.93 | 1.93  | ribosomal protein L41                                                | NM_001035267<br>/// NM_021104                                                                                                                                  | RPL41  |
| 226603_at          | 4.90 | 5.58  | sterile alpha motif                                                  | NM_152703                                                                                                                                                      | SAMD9L |
| 231382_at          | 4.85 | 12.25 | fibroblast growth factor<br>18                                       | NM_003862                                                                                                                                                      | FGF18  |
| 232757_at          | 4.80 | 2.36  | metastasis suppressor 1                                              | NM_014751                                                                                                                                                      | MTSS1  |
| 228531_at          | 4.79 | 4.97  | sterile alpha motif<br>domain containing 9                           | NM_017654                                                                                                                                                      | SAMD9  |
| 202350_s_at        | 4.78 | 3.60  | matrilin 2                                                           | NM_002380 ///<br>NM_030583                                                                                                                                     | MATN2  |
| 1552715_a_at       | 4.74 | 1.82  | relaxin/insulin-like family                                          | NM_021634                                                                                                                                                      | RXFP1  |
| 218943_s_at        | 4.74 | 4.26  | DEAD (Asp-Glu-Ala-<br>Asp) box polypeptide 58                        | NM_014314                                                                                                                                                      | DDX58  |
| 205600_x_at        | 4.68 | 3.52  | homeobox B5                                                          | NM_002147                                                                                                                                                      | HOXB5  |
| 219106_s_at        | 4.63 | 3.26  | kelch repeat and BTB<br>(POZ) domain containing<br>10                | NM_006063                                                                                                                                                      | KBTD10 |
| 242416_at          | 4.55 | 2.19  | protein tyrosine<br>phosphatase, receptor<br>type, G                 | NM_002841                                                                                                                                                      | PTPRG  |
| 203596_s_at        | 4.53 | 20.02 | interferon-induced<br>protein with<br>tetratricopeptide repeats<br>5 | NM_012420                                                                                                                                                      | IFIT5  |
| 244503_at          | 4.51 | 9.32  | brain-derived<br>neurotrophic factor                                 | NM_001709 ///<br>NM_170731 ///<br>NM_170732 ///<br>NM_170733 ///<br>NM_170734 ///<br>NM_170735                                                                 | BDNF   |
| 210834_s_at        | 4.50 | 2.23  | prostaglandin E receptor<br>3 (subtype EP3)                          | NM_000957 ///<br>NM_198712 ///<br>NM_198713 ///<br>NM_198714 ///<br>NM_198715 ///<br>NM_198716 ///<br>NM_198717 ///<br>NM_198718 ///<br>NM_198719<br>NM_016459 | PTGER3 |
| 223565_at          | 4.40 | 2.18  |                                                                      |                                                                                                                                                                |        |
| AFFX-<br>HUMRGE/M1 | 4.36 | 1.84  |                                                                      |                                                                                                                                                                |        |
| 0098_M_at          |      |       |                                                                      |                                                                                                                                                                |        |
| 214022_s_at        | 4.32 | 5.56  | interferon induced<br>transmembrane protein 2<br>(1-8D)              | NM_003641                                                                                                                                                      | IFITM2 |
| 206446_s_at        | 4.29 | 3.10  |                                                                      | NM_033440                                                                                                                                                      |        |

|             |      |      |                                                                                                            |                                                                                  |           |
|-------------|------|------|------------------------------------------------------------------------------------------------------------|----------------------------------------------------------------------------------|-----------|
| 233888_s_at | 4.28 | 3.74 | SLIT-ROBO Rho GTPase activating protein 1                                                                  | NM_020762                                                                        | SRGAP1    |
| 203789_s_at | 4.22 | 3.50 | sema domain, immunoglobulin domain (Ig), short basic domain, secreted, (semaphorin) 3C                     | NM_006379                                                                        | SEMA3C    |
| 1554314_at  | 4.18 | 2.43 | chromosome 6 open reading frame 141                                                                        | NM_153344                                                                        | C6orf141  |
| 242907_at   | 4.17 | 6.21 | guanylate binding protein 2, interferon-inducible                                                          | NM_004120                                                                        | GBP2      |
| 232088_x_at | 4.15 | 1.77 | 2'-5'-oligoadenylate prostaglandin-endoperoxide synthase 2 (prostaglandin G/H synthase and cyclooxygenase) | NM_001032731                                                                     | OAS2      |
| 206553_at   | 4.14 | 7.67 |                                                                                                            | NM_000963                                                                        | PTGS2     |
| 204748_at   | 4.08 | 3.47 |                                                                                                            |                                                                                  |           |
| 218986_s_at | 4.08 | 6.10 | DEAD (Asp-Glu-Ala-Asp) box polypeptide 60                                                                  | NM_017631                                                                        | DDX60     |
| 212942_s_at | 4.07 | 2.97 | KIAA1199                                                                                                   | NM_018689                                                                        | KIAA1199  |
| 212224_at   | 4.05 | 4.22 | aldehyde dehydrogenase 1 family, member A1                                                                 | NM_000689                                                                        | ALDH1A1   |
| 1552908_at  | 4.04 | 2.01 | chromosome 1 open reading frame 150                                                                        | NM_145278                                                                        | C1orf150  |
| 218330_s_at | 3.96 | 2.18 | neuron navigator 2                                                                                         | NM_145117 ///<br>NM_182964                                                       | NAV2      |
| 219352_at   | 3.96 | 3.42 | hect domain and RLD 6                                                                                      | NM_017912                                                                        | HERC6     |
| 201508_at   | 3.93 | 1.84 | insulin-like growth factor binding protein 4                                                               | NM_001552                                                                        | IGFBP4    |
| 202145_at   | 3.87 | 3.64 | lymphocyte antigen 6 complex, locus E                                                                      | NM_002346                                                                        | LY6E      |
| 213362_at   | 3.85 | 2.03 | protein tyrosine phosphatase, receptor type, D                                                             | NM_001040712<br>/// NM_002839<br>/// NM_130391<br>/// NM_130392<br>/// NM_130393 | PTPRD     |
| 244764_at   | 3.84 | 5.14 | human immunodeficiency virus type 1 enhancer binding protein 3                                             | NM_024503                                                                        | HIVEP3    |
| 210666_at   | 3.79 | 1.94 | iduronate 2-sulfatase (Hunter syndrome)                                                                    | NM_000202 ///<br>NM_006123                                                       | IDS       |
| 230000_at   | 3.79 | 4.10 | ring finger protein 213                                                                                    | NM_020914                                                                        | RNF213    |
| 1553204_at  | 3.77 | 2.35 | chromosome 20 open reading frame 200                                                                       | NM_152757                                                                        | C20orf200 |

|                                    |      |      |                                                                                  |                                                              |              |
|------------------------------------|------|------|----------------------------------------------------------------------------------|--------------------------------------------------------------|--------------|
| 244625_at                          | 3.77 | 1.93 | arginine-glutamic acid dipeptide (RE) repeats                                    | NM_001042681<br>///<br>NM_001042682<br>///<br>NM_012102      | RERE         |
| 238649_at                          | 3.75 | 3.03 | phosphatidylinositol transfer protein, cytoplasmic 1                             | NM_012417 ///<br>NM_181671                                   | PITPNC1      |
| 219478_at                          | 3.74 | 4.73 | WAP four-disulfide core domain 1                                                 | NM_021197                                                    | WFDC1        |
| 1561292_at                         | 3.72 | 2.24 | signal transducer and activator of transcription 1, 91kDa                        | NM_007315 ///<br>NM_139266                                   | STAT1        |
| AFFX-<br>HUMISGF3A/<br>M97935_5_at | 3.71 | 4.90 |                                                                                  |                                                              |              |
| 238575_at                          | 3.71 | 1.98 | oxysterol binding protein-like 6                                                 | NM_032523 ///<br>NM_145739                                   | OSBPL6       |
| 219684_at                          | 3.68 | 5.40 | receptor (chemosensory) transporter protein 4                                    | NM_022147                                                    | RTP4         |
| 236949_at                          | 3.67 | 9.32 | RAR-related orphan receptor A                                                    | NM_002943 ///<br>NM_134260 ///<br>NM_134261 ///<br>NM_134262 | RORA         |
| 243923_at                          | 3.63 | 2.14 | 2'-5'-oligoadenylate synthetase 2, 69/71kDa                                      | NM_001032731<br>///<br>NM_002535<br>///<br>NM_016817         | OAS2         |
| 228607_at                          | 3.62 | 8.52 |                                                                                  |                                                              |              |
| 200887_s_at                        | 3.60 | 4.07 | signal transducer and activator of transcription 1, 91kDa                        | NM_007315 ///<br>NM_139266                                   | STAT1        |
| 214596_at                          | 3.60 | 5.95 | HEG homolog 1<br>early growth response 1                                         | XM_087386<br>NM_001964                                       | HEG1<br>EGR1 |
| 229199_at                          | 3.58 | 3.18 |                                                                                  |                                                              |              |
| 1559037_a_at                       | 3.57 | 5.51 |                                                                                  |                                                              |              |
| 201693_s_at                        | 3.57 | 1.76 |                                                                                  |                                                              |              |
| 222793_at                          | 3.57 | 3.24 | DEAD (Asp-Glu-Ala-Asp) box polypeptide 58                                        | NM_014314                                                    | DDX58        |
| 206493_at                          | 3.57 | 2.19 | integrin, alpha 2b (platelet glycoprotein IIb of IIb/IIIa complex, antigen CD41) | NM_000419                                                    | ITGA2B       |
| 44783_s_at                         | 3.56 | 7.08 | hairly/enhancer-of-split related with YRPW motif 1                               | NM_001040708<br>///<br>NM_012258                             | HEY1         |
| 209969_s_at                        | 3.56 | 4.87 | signal transducer and activator of transcription 1, 91kDa                        | NM_007315 ///<br>NM_139266                                   | STAT1        |
| 223220_s_at                        | 3.54 | 4.85 | poly (ADP-ribose) polymerase family, member 9                                    | NM_031458                                                    | PARP9        |
| 242488_at                          | 3.52 | 3.41 |                                                                                  |                                                              |              |



|             |      |      |                                                                                  |                                                                                                                                                                                                      |          |
|-------------|------|------|----------------------------------------------------------------------------------|------------------------------------------------------------------------------------------------------------------------------------------------------------------------------------------------------|----------|
| 227809_at   | 3.52 | 2.26 | zinc finger CCCH-type containing 6                                               | NM_198581                                                                                                                                                                                            | ZC3H6    |
| 211889_x_at | 3.50 | 2.57 | carcinoembryonic antigen-related cell adhesion molecule 1 (biliary glycoprotein) | NM_001024912<br>/// NM_001712                                                                                                                                                                        | CEACAM1  |
| 212062_at   | 3.48 | 2.45 | ATPase, class II, type 9A                                                        | NM_006045                                                                                                                                                                                            | ATP9A    |
| 235643_at   | 3.48 | 4.31 | sterile alpha motif                                                              | NM_152703                                                                                                                                                                                            | SAMD9L   |
| 210831_s_at | 3.48 | 8.86 | prostaglandin E receptor 3 (subtype EP3)                                         | NM_000957 ///<br>NM_198712 ///<br>NM_198713 ///<br>NM_198714 ///<br>NM_198715 ///<br>NM_198716 ///<br>NM_198717 ///<br>NM_198718 ///<br>NM_198719                                                    | PTGER3   |
| 228904_at   | 3.45 | 3.07 | homeobox B3                                                                      | NM_002146                                                                                                                                                                                            | HOXB3    |
| 220298_s_at | 3.43 | 2.13 | spermatogenesis associated 6                                                     | NM_019073                                                                                                                                                                                            | SPATA6   |
| 213058_at   | 3.41 | 2.05 | tetratricopeptide repeat domain 28                                               | XM_929318 ///<br>XM_939083                                                                                                                                                                           | TTC28    |
| 244605_at   | 3.41 | 3.19 |                                                                                  |                                                                                                                                                                                                      |          |
| 239555_at   | 3.39 | 2.01 | v-yes-1 Yamaguchi sarcoma viral related oncogene homolog                         | NM_002350                                                                                                                                                                                            | LYN      |
| 202526_at   | 3.39 | 2.97 | SMAD family member 4                                                             | NM_005359                                                                                                                                                                                            | SMAD4    |
| 215146_s_at | 3.39 | 2.73 | tetratricopeptide repeat domain 28                                               | XM_929318 ///<br>XM_939083                                                                                                                                                                           | TTC28    |
| 204981_at   | 3.37 | 2.57 | solute carrier family 22, member 18                                              | NM_002555 ///<br>NM_183233                                                                                                                                                                           | SLC22A18 |
| 228152_s_at | 3.36 | 5.69 | DEAD (Asp-Glu-Ala-Asp) box polypeptide 60-like                                   | XM_037817 ///<br>XM_930964 ///<br>XM_930969 ///<br>XM_930988 ///<br>XM_930996 ///<br>XM_931005 ///<br>XM_940236 ///<br>XM_944501 ///<br>XM_944502 ///<br>XM_944508 ///<br>XM_944511 ///<br>XM_944514 | DDX60L   |
| 219534_x_at | 3.36 | 2.67 | cyclin-dependent kinase inhibitor 1C (p57, Kip2)                                 | NM_000076                                                                                                                                                                                            | CDKN1C   |
| 203882_at   | 3.32 | 4.86 | interferon regulatory factor 9                                                   | NM_006084                                                                                                                                                                                            | IRF9     |
| 206289_at   | 3.31 | 2.05 | homeobox A4                                                                      | NM_002141                                                                                                                                                                                            | HOXA4    |
| 243846_x_at | 3.31 | 5.59 |                                                                                  | XM_926804                                                                                                                                                                                            |          |

|              |      |       |                                                                                                              |                                     |          |
|--------------|------|-------|--------------------------------------------------------------------------------------------------------------|-------------------------------------|----------|
| 336_at       | 3.31 | 1.96  | thromboxane A2<br>receptor                                                                                   | NM_001060 ///<br>NM_201636          | TBXA2R   |
| 231365_at    | 3.28 | 2.19  |                                                                                                              |                                     |          |
| 204187_at    | 3.27 | 2.41  | guanosine<br>monophosphate<br>reductase                                                                      | NM_006877                           | GMPR     |
| 1552783_at   | 3.25 | 3.31  | zinc finger protein 417                                                                                      | NM_152475                           | ZNF417   |
| 1559315_s_at | 3.25 | 2.11  |                                                                                                              | XM_931697 ///                       |          |
| 226065_at    | 3.25 | 2.58  | prickle homolog 1<br>(Drosophila)                                                                            | NM_153026                           | PRICKLE1 |
| 204918_s_at  | 3.24 | 2.02  | myeloid/lymphoid or<br>mixed-lineage leukemia<br>(trithorax homolog,<br>Drosophila); translocated<br>to, 3   | NM_004529                           | MLLT3    |
| 226189_at    | 3.24 | 8.17  | integrin, beta 8                                                                                             | NM_002214                           | ITGB8    |
| 235885_at    | 3.23 | 64.82 | purinergic receptor P2Y,<br>G-protein coupled, 12                                                            | NM_022788 ///<br>NM_176876          | P2RY12   |
| 209732_at    | 3.22 | 3.35  | C-type lectin domain<br>family 2, member B                                                                   | NM_005127                           | CLEC2B   |
| 206847_s_at  | 3.21 | 1.86  | homeobox A7                                                                                                  | NM_006896                           | HOXA7    |
| 202241_at    | 3.19 | 2.05  | tribbles homolog 1<br>(Drosophila)                                                                           | NM_025195                           | TRIB1    |
| 205352_at    | 3.18 | 2.31  | serpin peptidase<br>inhibitor, clade I<br>(neuroserpin), member 1                                            | NM_005025                           | SERPINI1 |
| 37802_r_at   | 3.18 | 2.39  | family with sequence<br>similarity 63, member B                                                              | NM_001040450<br>///<br>NM_001040453 | FAM63B   |
| 228886_at    | 3.18 | 1.75  | leucine rich repeat<br>containing 27                                                                         | NM_030626                           | LRRC27   |
| 223805_at    | 3.18 | 2.72  | oxysterol binding protein-<br>like 6                                                                         | NM_032523 ///<br>NM_145739          | OSBPL6   |
| 235157_at    | 3.17 | 6.30  | poly (ADP-ribose)<br>polymerase family,<br>member 14                                                         | NM_017554                           | PARP14   |
| 229309_at    | 3.14 | 3.31  |                                                                                                              |                                     |          |
| 238430_x_at  | 3.14 | 2.67  | schlafen family member<br>5                                                                                  | NM_144975                           | SLFN5    |
| 239698_at    | 3.13 | 2.74  |                                                                                                              |                                     |          |
| 204044_at    | 3.11 | 2.39  | quinolinate<br>phosphoribosyltransfera<br>se (nicotinate-nucleotide<br>pyrophosphorylase<br>(carboxylating)) | NM_014298                           | QPRT     |
| 212274_at    | 3.06 | 2.10  | lipin 1                                                                                                      | NM_145693                           | LPIN1    |
| 206447_at    | 3.06 | 1.76  |                                                                                                              | NM_033440                           |          |
| 209417_s_at  | 3.05 | 4.69  | interferon-induced<br>protein 35                                                                             | NM_005533                           | IFI35    |

|             |      |      |                                                                           |                                                                                                                                                   |          |
|-------------|------|------|---------------------------------------------------------------------------|---------------------------------------------------------------------------------------------------------------------------------------------------|----------|
| 227195_at   | 3.05 | 6.86 | zinc finger protein 503                                                   | NM_032772                                                                                                                                         | ZNF503   |
| 1554319_at  | 3.05 | 6.18 | ribosomal protein S6<br>kinase, 90kDa,<br>polypeptide 5                   | NM_004755 ///<br>NM_182398                                                                                                                        | RPS6KA5  |
| 231956_at   | 3.03 | 2.55 | KIAA1618                                                                  | NM_020954                                                                                                                                         | KIAA1618 |
| 219209_at   | 3.02 | 2.94 | interferon induced with<br>helicase C domain 1                            | NM_022168                                                                                                                                         | IFIH1    |
| 213182_x_at | 3.01 | 2.28 | cyclin-dependent kinase<br>inhibitor 1C (p57, Kip2)                       | NM_000076                                                                                                                                         | CDKN1C   |
| 223980_s_at | 2.99 | 3.11 | SP110 nuclear body<br>protein                                             | NM_004509 ///<br>NM_004510 ///<br>NM_080424                                                                                                       | SP110    |
| 240539_at   | 2.99 | 2.46 | autism susceptibility<br>candidate 2                                      | NM_015570                                                                                                                                         | AUTS2    |
| 204205_at   | 2.98 | 3.07 | apolipoprotein B mRNA<br>editing enzyme, catalytic<br>polypeptide-like 3G | NM_021822                                                                                                                                         | APOBEC3G |
| 203485_at   | 2.97 | 2.89 | reticulon 1                                                               | NM_021136 ///<br>NM_206852 ///<br>NM_206857                                                                                                       | RTN1     |
| 237483_at   | 2.97 | 3.12 | pleckstrin homology<br>domain containing,<br>family A member 5            | NM_019012                                                                                                                                         | PLEKHA5  |
| 209374_s_at | 2.95 | 3.58 | immunoglobulin heavy<br>constant mu                                       |                                                                                                                                                   | IGHM     |
| 231577_s_at | 2.95 | 4.29 | guanylate binding<br>protein 1, interferon-<br>inducible, 67kDa           | NM_002053                                                                                                                                         | GBP1     |
| 244579_at   | 2.95 | 2.13 | trichorhinophalangeal<br>syndrome 1                                       | NM_014112                                                                                                                                         | TRPS1    |
| 219863_at   | 2.95 | 3.21 | hect domain and RLD 5                                                     | NM_016323                                                                                                                                         | HERC5    |
| 209905_at   | 2.92 | 3.58 | homeobox A9                                                               | NM_152739                                                                                                                                         | HOXA9    |
| 212820_at   | 2.92 | 2.80 | Dmx-like 2                                                                | NM_015263                                                                                                                                         | DMXL2    |
| 230008_at   | 2.91 | 2.16 | thrombospondin, type I,<br>domain containing 7A                           | XM_371877 ///<br>XM_374404 ///<br>XM_928187 ///<br>XM_932697 ///<br>XM_935904 ///<br>XM_935905 ///<br>XM_937164 ///<br>XM_943202 ///<br>XM_943205 | THSD7A   |
| 202269_x_at | 2.91 | 3.30 | guanylate binding<br>protein 1, interferon-<br>inducible, 67kDa           | NM_002053                                                                                                                                         | GBP1     |
| 242961_x_at | 2.90 | 3.50 | DEAD (Asp-Glu-Ala-<br>Asp) box polypeptide 58                             | NM_014314                                                                                                                                         | DDX58    |
| 203373_at   | 2.89 | 1.81 | suppressor of cytokine<br>signaling 2                                     | NM_003877                                                                                                                                         | SOCS2    |

|              |      |      |                                                                                                            |                                                                                                                                                                    |          |
|--------------|------|------|------------------------------------------------------------------------------------------------------------|--------------------------------------------------------------------------------------------------------------------------------------------------------------------|----------|
| 209870_s_at  | 2.89 | 2.25 | amyloid beta (A4)<br>precursor protein-<br>binding, family A,<br>member 2 (X11-like)                       | NM_005503                                                                                                                                                          | APBA2    |
| 1570623_at   | 2.89 | 5.43 |                                                                                                            |                                                                                                                                                                    |          |
| 243473_at    | 2.89 | 1.93 |                                                                                                            | NM_025164                                                                                                                                                          |          |
| 215446_s_at  | 2.89 | 6.33 | lysyl oxidase                                                                                              | NM_002317                                                                                                                                                          | LOX      |
| 1562863_at   | 2.88 | 2.18 | exostoses (multiple) 1                                                                                     | NM_000127                                                                                                                                                          | EXT1     |
| 244424_at    | 2.88 | 2.00 |                                                                                                            |                                                                                                                                                                    |          |
| 227703_s_at  | 2.87 | 2.41 | synaptotagmin-like 4<br>(granuphilin-a)                                                                    | NM_080737                                                                                                                                                          | SYTL4    |
| 1554568_at   | 2.87 | 2.52 | dynein, light chain,<br>roadblock-type 1                                                                   | NM_014183                                                                                                                                                          | DYNLRB1  |
| 209640_at    | 2.87 | 1.96 | promyelocytic leukemia                                                                                     | NM_002675 ///<br>NM_033238 ///<br>NM_033239 ///<br>NM_033240 ///<br>NM_033244 ///<br>NM_033246 ///<br>NM_033247 ///<br>NM_033249 ///<br>NM_033250 ///<br>XM_941774 | PML      |
| 1552480_s_at | 2.87 | 2.05 | protein tyrosine<br>phosphatase, receptor<br>type, C                                                       | NM_002838 ///<br>NM_080921 ///<br>NM_080922 ///<br>NM_080923                                                                                                       | PTPRC    |
| 218675_at    | 2.86 | 2.52 | solute carrier family 22,<br>member 17                                                                     | NM_016609 ///<br>NM_020372                                                                                                                                         | SLC22A17 |
| 1562235_s_at | 2.85 | 3.18 | pre-B-cell leukemia                                                                                        | NM_002585                                                                                                                                                          | PBX1     |
| 227273_at    | 2.84 | 3.27 |                                                                                                            |                                                                                                                                                                    |          |
| 241347_at    | 2.81 | 2.94 | KIAA1618                                                                                                   | NM_020954                                                                                                                                                          | KIAA1618 |
| 1558871_at   | 2.80 | 2.15 |                                                                                                            |                                                                                                                                                                    |          |
| 212698_s_at  | 2.80 | 2.39 | septin 10                                                                                                  | NM_144710 ///<br>NM_178584                                                                                                                                         | 10-Sep   |
| 207018_s_at  | 2.80 | 2.05 | RAB27B, member RAS<br>oncogene family                                                                      | NM_001001713<br>/// NM_004163<br>/// NM_007341                                                                                                                     | RAB27B   |
| 1558990_at   | 2.79 | 2.22 | chromosome 18 open<br>reading frame 21                                                                     | NM_031446                                                                                                                                                          | C18orf21 |
| 1569652_at   | 2.79 | 2.61 | myeloid/lymphoid or<br>mixed-lineage leukemia<br>(trithorax homolog,<br>Drosophila); translocated<br>to, 3 | NM_004529                                                                                                                                                          | MLLT3    |
| 1561181_at   | 2.78 | 2.52 | AT rich interactive<br>domain 5B (MRF1-like)                                                               | NM_032199                                                                                                                                                          | ARID5B   |
| 216956_s_at  | 2.78 | 1.90 | integrin, alpha 2b<br>(platelet glycoprotein IIb<br>of IIb/IIIa complex,<br>antigen CD41)                  | NM_000419                                                                                                                                                          | ITGA2B   |

|             |      |       |                                                                                 |                                                              |         |
|-------------|------|-------|---------------------------------------------------------------------------------|--------------------------------------------------------------|---------|
| 218543_s_at | 2.77 | 2.83  | <i>poly (ADP-ribose) polymerase family, member 12</i>                           | NM_022750                                                    | PARP12  |
| 218999_at   | 2.77 | 3.12  | <i>transmembrane protein 140</i>                                                | NM_018295                                                    | TMEM140 |
| 232610_at   | 2.77 | 2.75  | <i>poly (ADP-ribose) polymerase family, member 14</i>                           | NM_017554                                                    | PARP14  |
| 205856_at   | 2.72 | 48.06 | <i>solute carrier family 14 (urea transporter), member 1 (Kidd blood group)</i> | NM_015865                                                    | SLC14A1 |
| 203595_s_at | 2.71 | 6.04  | <i>interferon-induced protein with tetratricopeptide repeats 5</i>              | NM_012420                                                    | IFIT5   |
| 206831_s_at | 2.71 | 4.80  | <i>arylsulfatase D</i>                                                          | NM_001669 ///<br>NM_009589                                   | ARSD    |
| 34408_at    | 2.70 | 2.35  | <i>reticulon 2</i>                                                              | NM_005619 ///<br>NM_206900 ///<br>NM_206901 ///<br>NM_206902 | RTN2    |
| 204141_at   | 2.70 | 2.11  | <i>tubulin, beta 2A</i>                                                         | NM_001069                                                    | TUBB2A  |
| 1565821_at  | 2.69 | 2.32  |                                                                                 |                                                              |         |
| 242172_at   | 2.69 | 1.81  | <i>Meis homeobox 1</i>                                                          | NM_002398                                                    | MEIS1   |
| 206310_at   | 2.68 | 2.75  | <i>serine peptidase inhibitor, Kazal type 2 (acrosin-trypsin inhibitor)</i>     | NM_021114                                                    | SPINK2  |
| 237409_at   | 2.67 | 2.67  | <i>death-associated protein kinase 1</i>                                        | NM_004938                                                    | DAPK1   |
| 212203_x_at | 2.67 | 2.69  | <i>interferon induced transmembrane protein 3 (1-8U)</i>                        | NM_021034                                                    | IFITM3  |
| 239336_at   | 2.66 | 2.04  | <i>thrombospondin 1</i>                                                         | NM_003246                                                    | THBS1   |
| 235046_at   | 2.66 | 1.90  |                                                                                 |                                                              |         |
| 236034_at   | 2.66 | 17.67 |                                                                                 |                                                              |         |
| 213578_at   | 2.65 | 2.37  | <i>bone morphogenetic protein receptor, type IA</i>                             | NM_004329                                                    | BMPR1A  |
| 241978_at   | 2.65 | 1.88  | <i>aldo-keto reductase family 1, member A1 (aldehyde reductase)</i>             | NM_006066 ///<br>NM_153326                                   | AKR1A1  |
| 235185_s_at | 2.64 | 2.67  | <i>sequestosome 1</i>                                                           | NM_003900                                                    | SQSTM1  |
| 223179_at   | 2.64 | 2.76  | <i>yippee-like 3 (Drosophila)</i>                                               | NM_031477                                                    | YPEL3   |
| 240439_at   | 2.63 | 4.08  |                                                                                 |                                                              |         |
| 226702_at   | 2.62 | 2.59  | <i>cytidine monophosphate (UMP-CMP) kinase 2, mitochondrial</i>                 | NM_207315                                                    | CMPK2   |

|              |      |      |                                                                                    |                                                                                                                                                                                                                                                                                                            |          |
|--------------|------|------|------------------------------------------------------------------------------------|------------------------------------------------------------------------------------------------------------------------------------------------------------------------------------------------------------------------------------------------------------------------------------------------------------|----------|
| 203304_at    | 2.62 | 2.35 | <i>BMP and activin membrane-bound inhibitor homolog (Xenopus laevis)</i>           | NM_012342                                                                                                                                                                                                                                                                                                  | BAMBI    |
| 1562591_a_at | 2.62 | 2.23 | <i>orofacial cleft 1</i>                                                           | NM_153003                                                                                                                                                                                                                                                                                                  | OFCC1    |
| 224559_at    | 2.61 | 2.10 | <i>metastasis associated lung adenocarcinoma transcript 1 (non-protein coding)</i> | NR_002819                                                                                                                                                                                                                                                                                                  | MALAT1   |
| 241501_at    | 2.61 | 2.19 | <i>Rho GTPase activating protein 25</i>                                            | NM_001007231<br>/// NM_014882                                                                                                                                                                                                                                                                              | ARHGAP25 |
| 219235_s_at  | 2.61 | 1.81 | <i>phosphatase and actin regulator 4</i>                                           | NM_023923                                                                                                                                                                                                                                                                                                  | PHACTR4  |
| 1554205_s_at | 2.60 | 2.67 | <i>islet cell autoantigen</i>                                                      | NM_138468 ///                                                                                                                                                                                                                                                                                              | ICA1L    |
| 225929_s_at  | 2.60 | 4.10 | <i>ring finger protein 213</i>                                                     | NM_020914                                                                                                                                                                                                                                                                                                  | RNF213   |
| 1556568_a_at | 2.60 | 1.98 | <i>nemo-like kinase</i>                                                            | NM_016231                                                                                                                                                                                                                                                                                                  | NLK      |
| 210461_s_at  | 2.60 | 2.06 | <i>actin binding LIM protein 1</i>                                                 | NM_001003407<br>///<br>NM_001003408<br>/// NM_002313<br>/// NM_006720                                                                                                                                                                                                                                      | ABLIM1   |
| 225239_at    | 2.59 | 1.81 |                                                                                    |                                                                                                                                                                                                                                                                                                            |          |
| 209859_at    | 2.58 | 4.84 | <i>tripartite motif-containing 9</i>                                               | NM_015163 ///<br>NM_052978                                                                                                                                                                                                                                                                                 | TRIM9    |
| 206381_at    | 2.58 | 2.30 | <i>sodium channel, voltage-gated, type II, alpha subunit</i>                       | NM_001040142<br>///<br>NM_001040143<br>/// NM_021007                                                                                                                                                                                                                                                       | SCN2A    |
| 1569238_a_at | 2.57 | 2.05 | <i>Rap guanine nucleotide exchange factor (GEF) 2</i>                              | XM_376350 ///<br>XM_930387 ///<br>XM_934710 ///<br>XM_934712 ///<br>XM_934714 ///<br>XM_934715 ///<br>XM_934716 ///<br>XM_934717 ///<br>XM_934718 ///<br>XM_939972 ///<br>XM_944390 ///<br>XM_944396 ///<br>XM_944398 ///<br>XM_944400 ///<br>XM_944402 ///<br>XM_944403 ///<br>XM_944410 ///<br>XM_944412 | RAPGEF2  |
| 206478_at    | 2.57 | 1.94 | <i>KIAA0125</i>                                                                    | NM_014792                                                                                                                                                                                                                                                                                                  | KIAA0125 |
| 227034_at    | 2.55 | 2.48 | <i>ankyrin repeat domain 57</i>                                                    | NM_023016                                                                                                                                                                                                                                                                                                  | ANKRD57  |

|                                    |      |       |                                                                                      |                                                                             |         |
|------------------------------------|------|-------|--------------------------------------------------------------------------------------|-----------------------------------------------------------------------------|---------|
| 237727_at                          | 2.55 | 2.34  | <i>FRAS1</i> related<br>extracellular matrix 1                                       | NM_144966                                                                   | FREM1   |
| 1553705_a_at                       | 2.55 | 2.78  | <i>guanylate binding<br/>protein 4</i>                                               | NM_052941                                                                   | GBP4    |
| 235175_at                          | 2.55 | 3.47  |                                                                                      |                                                                             |         |
| 228935_at                          | 2.54 | 2.00  | <i>solute carrier family 4,<br/>sodium bicarbonate<br/>cotransporter, member 8</i>   | NM_001039960<br>/// NM_004858                                               | SLC4A8  |
| 227062_at                          | 2.53 | 2.00  | <i>leucine rich repeat<br/>tubulin tyrosine ligase-<br/>like family, member 3</i>    | NR_002802                                                                   | LRRC43  |
| 1553729_s_at                       | 2.53 | 2.15  |                                                                                      | NM_152759                                                                   |         |
| 210129_s_at                        | 2.51 | 2.02  |                                                                                      | NM_001025930<br>/// NM_015644                                               |         |
| 225636_at                          | 2.51 | 2.86  | <i>signal transducer and<br/>activator of transcription<br/>2, 113kDa</i>            | NM_005419                                                                   | STAT2   |
| 229461_x_at                        | 2.51 | 2.97  | <i>neuronal growth<br/>regulator 1</i>                                               | NM_173808                                                                   | NEGR1   |
| 203662_s_at                        | 2.50 | 3.65  | <i>tropomodulin 1</i>                                                                | NM_003275                                                                   | TMOD1   |
| 202748_at                          | 2.50 | 3.45  | <i>guanylate binding<br/>protein 2, interferon-<br/>inducible</i>                    | NM_004120                                                                   | GBP2    |
| 225540_at                          | 2.50 | 8.28  | <i>microtubule-associated<br/>protein 2</i>                                          | NM_001039538<br>/// NM_002374<br>/// NM_031845<br>/// NM_031847             | MAP2    |
| 243999_at                          | 2.49 | 22.29 | <i>schlafen family member<br/>5</i>                                                  | NM_144975                                                                   | SLFN5   |
| 212827_at                          | 2.49 | 4.32  | <i>immunoglobulin heavy<br/>constant mu</i>                                          |                                                                             | IGHM    |
| 201236_s_at                        | 2.49 | 2.90  | <i>BTG family, member 2</i>                                                          | NM_006763                                                                   | BTG2    |
| 235478_at                          | 2.48 | 1.91  | <i>DNA cross-link repair 1C<br/>(PSO2 homolog, S.<br/>cerevisiae)</i>                | NM_001033855<br>///<br>NM_001033857<br>///<br>NM_001033858<br>/// NM_022487 | DCLRE1C |
| 204069_at                          | 2.48 | 1.85  | <i>Meis homeobox 1</i>                                                               | NM_002398                                                                   | MEIS1   |
| AFFX-<br>HUMISGF3A/<br>M97935_3_at | 2.46 | 3.61  | <i>signal transducer and<br/>activator of transcription<br/>1, 91kDa</i>             | NM_007315 ///<br>NM_139266                                                  | STAT1   |
| 240867_at                          | 2.46 | 2.14  | <i>regulatory factor X, 3<br/>(influences HLA class II<br/>expression)</i>           | NM_002919 ///<br>NM_134428                                                  | RFX3    |
| 219691_at                          | 2.45 | 4.25  | <i>sterile alpha motif<br/>domain containing 9</i>                                   | NM_017654                                                                   | SAMD9   |
| 201242_s_at                        | 2.45 | 2.40  | <i>ATPase, Na<sup>+</sup>/K<sup>+</sup><br/>transporting, beta 1<br/>polypeptide</i> | NM_001001787<br>/// NM_001677                                               | ATP1B1  |

|                             |      |       |                                                                                   |                                                                                                                                                                                                                                                                                                            |          |
|-----------------------------|------|-------|-----------------------------------------------------------------------------------|------------------------------------------------------------------------------------------------------------------------------------------------------------------------------------------------------------------------------------------------------------------------------------------------------------|----------|
| 224403_at                   | 2.45 | 13.91 | <i>Fc receptor-like 4</i>                                                         | NM_031282                                                                                                                                                                                                                                                                                                  | FCRL4    |
| 213294_at                   | 2.45 | 2.73  |                                                                                   |                                                                                                                                                                                                                                                                                                            |          |
| 207095_at                   | 2.44 | 3.41  | <i>solute carrier family 10 (sodium/bile acid cotransporter family), member 2</i> | NM_000452                                                                                                                                                                                                                                                                                                  | SLC10A2  |
| 201641_at                   | 2.44 | 3.35  | <i>bone marrow stromal cell antigen 2</i>                                         | NM_004335                                                                                                                                                                                                                                                                                                  | BST2     |
| 208012_x_at                 | 2.44 | 3.17  | <i>SP110 nuclear body protein</i>                                                 | NM_004509 ///<br>NM_004510 ///<br>NM_080424                                                                                                                                                                                                                                                                | SP110    |
| 218821_at                   | 2.43 | 2.50  | <i>aminopeptidase-like 1</i>                                                      | NM_024663                                                                                                                                                                                                                                                                                                  | NPEPL1   |
| 204082_at                   | 2.42 | 3.20  | <i>pre-B-cell leukemia homeobox 3</i>                                             | NM_006195                                                                                                                                                                                                                                                                                                  | PBX3     |
| 209459_s_at                 | 2.42 | 2.21  | <i>4-aminobutyrate aminotransferase</i>                                           | NM_000663 ///<br>NM_020686                                                                                                                                                                                                                                                                                 | ABAT     |
| 227839_at                   | 2.41 | 1.92  | <i>methyl-CpG binding domain protein 5</i>                                        | NM_018328                                                                                                                                                                                                                                                                                                  | MBD5     |
| 1562876_s_at                | 2.41 | 1.93  |                                                                                   | XR_001013                                                                                                                                                                                                                                                                                                  |          |
| 234033_at                   | 2.41 | 2.12  | <i>Rap guanine nucleotide exchange factor (GEF) 2</i>                             | XM_376350 ///<br>XM_930387 ///<br>XM_934710 ///<br>XM_934712 ///<br>XM_934714 ///<br>XM_934715 ///<br>XM_934716 ///<br>XM_934717 ///<br>XM_934718 ///<br>XM_939972 ///<br>XM_944390 ///<br>XM_944396 ///<br>XM_944398 ///<br>XM_944400 ///<br>XM_944402 ///<br>XM_944403 ///<br>XM_944410 ///<br>XM_944412 | RAPGEF2  |
| 232517_s_at                 | 2.40 | 2.25  |                                                                                   | NM_001037335<br>/// NM_033405                                                                                                                                                                                                                                                                              |          |
| 1557403_s_at                | 2.40 | 1.75  | <i>Rho guanine nucleotide exchange factor (GEF) 12</i>                            | NM_015313                                                                                                                                                                                                                                                                                                  | ARHGEF12 |
| 1564473_at                  | 2.40 | 2.03  | <i>establishment of cohesion 1 homolog 2 (S. cerevisiae)</i>                      | NM_001017420                                                                                                                                                                                                                                                                                               | ESCO2    |
| AFFX-HUMISGF3A/M97935_MA_at | 2.40 | 3.53  | <i>signal transducer and activator of transcription 1, 91kDa</i>                  | NM_007315 ///<br>NM_139266                                                                                                                                                                                                                                                                                 | STAT1    |
| 1559413_at                  | 2.38 | 3.82  | <i>t-complex 11 (mouse)-like 2</i>                                                | NM_152772                                                                                                                                                                                                                                                                                                  | TCP11L2  |



|             |      |      |                                                                       |                                                                                                                                                                                                                                                                                                            |         |
|-------------|------|------|-----------------------------------------------------------------------|------------------------------------------------------------------------------------------------------------------------------------------------------------------------------------------------------------------------------------------------------------------------------------------------------------|---------|
| 227807_at   | 2.38 | 2.63 | <i>poly (ADP-ribose) polymerase family, member 9</i>                  | NM_031458                                                                                                                                                                                                                                                                                                  | PARP9   |
| 225415_at   | 2.38 | 2.69 | <i>deltex 3-like (Drosophila)</i>                                     | NM_138287                                                                                                                                                                                                                                                                                                  | DTX3L   |
| 238210_at   | 2.38 | 1.80 | <i>RYK receptor-like tyrosine kinase</i>                              | NM_001005861<br>/// NM_002958                                                                                                                                                                                                                                                                              | RYK     |
| 238176_at   | 2.38 | 2.16 | <i>Rap guanine nucleotide exchange factor (GEF) 2</i>                 | XM_376350 ///<br>XM_930387 ///<br>XM_934710 ///<br>XM_934712 ///<br>XM_934714 ///<br>XM_934715 ///<br>XM_934716 ///<br>XM_934717 ///<br>XM_934718 ///<br>XM_939972 ///<br>XM_944390 ///<br>XM_944396 ///<br>XM_944398 ///<br>XM_944400 ///<br>XM_944402 ///<br>XM_944403 ///<br>XM_944410 ///<br>XM_944412 | RAPGEF2 |
| 204529_s_at | 2.36 | 4.03 | <i>thymocyte selection-associated high mobility group box</i>         | NM_014729                                                                                                                                                                                                                                                                                                  | TOX     |
| 1555474_at  | 2.36 | 1.80 | <i>tubulin tyrosine ligase-like family, member 3</i>                  | NM_001025930<br>/// NM_015644                                                                                                                                                                                                                                                                              | TTLL3   |
| 242079_at   | 2.35 | 1.86 | <i>regulator of G-protein signaling 12</i>                            | NM_002926 ///<br>NM_198227 ///<br>NM_198229                                                                                                                                                                                                                                                                | RGS12   |
| 213293_s_at | 2.34 | 2.60 | <i>tripartite motif-containing 22</i>                                 | NM_006074                                                                                                                                                                                                                                                                                                  | TRIM22  |
| 241508_at   | 2.34 | 1.80 | <i>ankyrin repeat domain 12</i>                                       | NM_015208                                                                                                                                                                                                                                                                                                  | ANKRD12 |
| 232375_at   | 2.34 | 3.53 | <i>signal transducer and activator of transcription 1, 91kDa</i>      | NM_007315 ///<br>NM_139266                                                                                                                                                                                                                                                                                 | STAT1   |
| 232213_at   | 2.34 | 2.15 | <i>pellino homolog 1 (Drosophila)</i>                                 | NM_020651                                                                                                                                                                                                                                                                                                  | PELI1   |
| 53720_at    | 2.33 | 3.18 |                                                                       | NM_018381                                                                                                                                                                                                                                                                                                  |         |
| 209392_at   | 2.33 | 2.29 | <i>ectonucleotide pyrophosphatase/phosphodiesterase 2 (autotaxin)</i> | NM_001040092<br>/// NM_006209                                                                                                                                                                                                                                                                              | ENPP2   |

|                             |      |      |                                                                    |                                                                                                                                                   |          |
|-----------------------------|------|------|--------------------------------------------------------------------|---------------------------------------------------------------------------------------------------------------------------------------------------|----------|
| 229280_s_at                 | 2.33 | 2.31 |                                                                    | XM_379398 ///<br>XM_932815 ///<br>XM_932820 ///<br>XM_944201 ///<br>XM_944203 ///<br>XM_944207                                                    |          |
| 204567_s_at                 | 2.33 | 1.78 | <i>ATP-binding cassette, sub-family G (WHITE), member 1</i>        | NM_004915 ///<br>NM_016818 ///<br>NM_207174 ///<br>NM_207627 ///<br>NM_207628 ///<br>NM_207629 ///<br>NM_207630                                   | ABCG1    |
| 1561158_at                  | 2.33 | 1.76 |                                                                    |                                                                                                                                                   |          |
| 1556462_a_at                | 2.33 | 1.95 | <i>Kruppel-like factor 12</i>                                      | NM_007249 ///                                                                                                                                     | KLF12    |
| 222134_at                   | 2.32 | 1.94 | <i>D-aspartate oxidase</i>                                         | NM_003649 ///                                                                                                                                     | DDO      |
| 213933_at                   | 2.32 | 2.73 | <i>prostaglandin E receptor 3 (subtype EP3)</i>                    | NM_000957 ///<br>NM_198712 ///<br>NM_198713 ///<br>NM_198714 ///<br>NM_198715 ///<br>NM_198716 ///<br>NM_198717 ///<br>NM_198718 ///<br>NM_198719 | PTGER3   |
| 243902_at                   | 2.32 | 2.10 | <i>SEC22 vesicle trafficking protein homolog B (S. cerevisiae)</i> | NM_004892                                                                                                                                         | SEC22B   |
| 212614_at                   | 2.32 | 1.98 | <i>AT rich interactive domain 5B (MRF1-like)</i>                   | NM_032199                                                                                                                                         | ARID5B   |
| 209762_x_at                 | 2.32 | 2.61 | <i>SP110 nuclear body protein</i>                                  | NM_004509 ///<br>NM_004510 ///<br>NM_080424                                                                                                       | SP110    |
| AFFX-HUMISGF3A/M97935_MB_at | 2.32 | 3.44 | <i>signal transducer and activator of transcription 1, 91kDa</i>   | NM_007315 ///<br>NM_139266                                                                                                                        | STAT1    |
| 202949_s_at                 | 2.32 | 1.85 | <i>four and a half LIM domains 2</i>                               | NM_001039492<br>/// NM_001450<br>/// NM_201555<br>/// NM_201557                                                                                   | FHL2     |
| 213358_at                   | 2.32 | 1.74 | <i>KIAA0802</i>                                                    | NM_001006114<br>/// NM_015210<br>/// NM_058181                                                                                                    | KIAA0802 |
| 209118_s_at                 | 2.32 | 2.21 | <i>tubulin, alpha 1a</i>                                           | NM_006009                                                                                                                                         | TUBA1A   |
| 1570198_x_at                | 2.31 | 2.48 | <i>bone marrow stromal cell antigen 2</i>                          | NM_004335                                                                                                                                         | BST2     |

|             |      |      |                                                                   |                                                            |            |
|-------------|------|------|-------------------------------------------------------------------|------------------------------------------------------------|------------|
| 238583_at   | 2.31 | 2.60 | methionine sulfoxide reductase B3                                 | NM_001031679<br>/// NM_198080                              | MSRB3      |
| 208392_x_at | 2.31 | 3.15 | SP110 nuclear body protein                                        | NM_004509 ///<br>NM_004510 ///<br>NM_080424                | SP110      |
| 210145_at   | 2.31 | 2.68 | phospholipase A2, group IVA (cytosolic, calcium-dependent)        | NM_024420                                                  | PLA2G4A    |
| 239999_at   | 2.28 | 1.77 | chromosome 21 open reading frame 34                               | NM_001005732<br>///<br>NM_001005733<br>///<br>NM_001005734 | C21orf34   |
| 232803_at   | 2.28 | 1.85 |                                                                   |                                                            |            |
| 202820_at   | 2.28 | 2.89 | aryl hydrocarbon receptor                                         | NM_001621                                                  | AHR        |
| 44673_at    | 2.28 | 1.87 | sialic acid binding Ig-like lectin 1, sialoadhesin                | NM_023068                                                  | SIGLEC1    |
| 241497_at   | 2.27 | 5.29 |                                                                   |                                                            |            |
| 214651_s_at | 2.27 | 2.84 | homeobox A9                                                       | NM_152739                                                  | HOXA9      |
| 206181_at   | 2.27 | 3.88 | signaling lymphocytic activation molecule family member 1         | NM_003037                                                  | SLAMF1     |
| 214290_s_at | 2.27 | 2.01 |                                                                   | NM_001040874<br>/// NM_003516<br>/// XM_928387             |            |
| 214688_at   | 2.26 | 2.13 | transducin-like enhancer of split 4 (E(sp1) homolog, Drosophila)  | NM_007005                                                  | TLE4       |
| 216813_at   | 2.26 | 2.50 |                                                                   |                                                            |            |
| 218429_s_at | 2.25 | 2.69 |                                                                   | NM_018381                                                  |            |
| 219049_at   | 2.24 | 1.74 | chondroitin sulfate N-acetylgalactosaminyltransferase 1           | NM_018371                                                  | CSGALNACT1 |
| 1559949_at  | 2.23 | 2.71 | trichorhinophalangeal syndrome I                                  | NM_014112                                                  | TRPS1      |
| 222146_s_at | 2.23 | 3.07 | transcription factor 4                                            | NM_003199                                                  | TCF4       |
| 201015_s_at | 2.23 | 2.38 | junction plakoglobin                                              | NM_002230 ///<br>NM_021991                                 | JUP        |
| 233152_x_at | 2.23 | 1.79 | tankyrase, TRF1-interacting ankyrin-related ADP-ribose polymerase | NM_003747                                                  | TNKS       |
| 209761_s_at | 2.21 | 3.07 | SP110 nuclear body protein                                        | NM_004509 ///<br>NM_004510 ///<br>NM_080424                | SP110      |
| 242197_x_at | 2.21 | 2.05 | CD36 molecule                                                     | NM_000072 ///                                              | CD36       |
| 241238_at   | 2.20 | 3.11 |                                                                   |                                                            |            |

|              |      |      |                                                                                                                  |                                                                                                                                                   |           |
|--------------|------|------|------------------------------------------------------------------------------------------------------------------|---------------------------------------------------------------------------------------------------------------------------------------------------|-----------|
| 1554712_a_at | 2.20 | 4.17 | glycine-N-                                                                                                       | NM_145016                                                                                                                                         | GLYATL2   |
| 228108_at    | 2.20 | 3.77 |                                                                                                                  |                                                                                                                                                   |           |
| 233465_at    | 2.20 | 1.86 | sprouty-related, EVH1                                                                                            | NM_152594                                                                                                                                         | SPRED1    |
| 223044_at    | 2.20 | 1.77 | solute carrier family 40<br>(iron-regulated<br>transporter), member 1                                            | NM_014585                                                                                                                                         | SLC40A1   |
| 241202_at    | 2.19 | 2.10 | UDP-N-acetyl-alpha-D-<br>galactosamine:polypepti<br>de N-<br>acetylgalactosaminyltran<br>sferase 10 (GalNAc-T10) | NM_017540 ///<br>NM_198321                                                                                                                        | GALNT10   |
| 239587_at    | 2.19 | 1.92 |                                                                                                                  |                                                                                                                                                   |           |
| 233887_at    | 2.19 | 4.63 | G protein-coupled<br>receptor 126                                                                                | NM_001032394<br>///<br>NM_001032395<br>/// NM_020455<br>/// NM_198569                                                                             | GPR126    |
| 234284_at    | 2.18 | 2.86 | guanine nucleotide<br>binding protein (G<br>protein), gamma 8                                                    | NM_033258                                                                                                                                         | GNG8      |
| 202074_s_at  | 2.18 | 1.96 | optineurin                                                                                                       | NM_001008211<br>///<br>NM_001008212<br>///<br>NM_001008213<br>/// NM_021980                                                                       | OPTN      |
| 209806_at    | 2.17 | 1.80 | histone cluster 1, H2bk                                                                                          | NM_080593                                                                                                                                         | HIST1H2BK |
| 235884_at    | 2.17 | 1.74 |                                                                                                                  |                                                                                                                                                   |           |
| 226069_at    | 2.17 | 7.59 | prickle homolog 1<br>(Drosophila)                                                                                | NM_153026                                                                                                                                         | PRICKLE1  |
| 210375_at    | 2.17 | 2.50 | prostaglandin E receptor<br>3 (subtype EP3)                                                                      | NM_000957 ///<br>NM_198712 ///<br>NM_198713 ///<br>NM_198714 ///<br>NM_198715 ///<br>NM_198716 ///<br>NM_198717 ///<br>NM_198718 ///<br>NM_198719 | PTGER3    |
| 228678_at    | 2.17 | 1.96 | cytochrome P450, family<br>2, subfamily U,<br>polypeptide 1                                                      | NM_001001794<br>/// NM_183075                                                                                                                     | CYP2U1    |
| 1559633_a_at | 2.17 | 1.77 | cholinergic receptor,<br>inhibitor of DNA binding                                                                | NM_000740                                                                                                                                         | CHRM3     |
| 213931_at    | 2.16 | 1.77 | 2, dominant negative<br>helix-loop-helix protein                                                                 | NM_001039082<br>/// NM_002166                                                                                                                     | ID2       |

|             |      |      |                                                                                                |                                                                                              |          |
|-------------|------|------|------------------------------------------------------------------------------------------------|----------------------------------------------------------------------------------------------|----------|
| 217788_s_at | 2.16 | 1.95 | UDP-N-acetyl-alpha-D-galactosamine:polypeptide N-acetylgalactosaminyltransferase 2 (GalNAc-T2) | NM_004481                                                                                    | GALNT2   |
| 240633_at   | 2.15 | 2.48 | docking protein 7                                                                              | NM_173660                                                                                    | DOK7     |
| 226756_at   | 2.15 | 2.87 |                                                                                                |                                                                                              |          |
| 1560396_at  | 2.15 | 1.77 | kelch-like 6 ( <i>Drosophila</i> )                                                             | NM_130446                                                                                    | KLHL6    |
| 201334_s_at | 2.14 | 1.99 | Rho guanine nucleotide exchange factor (GEF) 12                                                | NM_015313                                                                                    | ARHGEF12 |
| 213261_at   | 2.14 | 1.77 |                                                                                                | XM_047357 ///<br>XM_940627                                                                   |          |
| 229956_at   | 2.13 | 2.12 |                                                                                                |                                                                                              |          |
| 201315_x_at | 2.13 | 2.46 | interferon induced transmembrane protein 2 (1-8D)                                              | NM_006435                                                                                    | IFITM2   |
| 209763_at   | 2.12 | 2.60 | chordin-like 1                                                                                 | NM_145234                                                                                    | CHRDL1   |
| 1562484_at  | 2.12 | 1.79 |                                                                                                | NM_001033659                                                                                 |          |
| 241478_at   | 2.12 | 1.86 | MICAL-like 2                                                                                   | NM_024723 ///<br>NM_182924                                                                   | MICALL2  |
| 208886_at   | 2.12 | 2.22 | H1 histone family, member 0                                                                    | NM_005318                                                                                    | H1F0     |
| 1294_at     | 2.12 |      | ubiquitin-like modifier                                                                        | NM_003335                                                                                    | UBA7     |
| 239307_at   | 2.12 | 1.79 |                                                                                                |                                                                                              |          |
| 209327_s_at | 2.12 | 1.96 |                                                                                                | NM_016391                                                                                    |          |
| 233880_at   | 2.11 | 2.25 | ring finger protein 213                                                                        | NM_020914                                                                                    | RNF213   |
| 232155_at   | 2.11 | 2.71 | KIAA1618                                                                                       | NM_020954                                                                                    | KIAA1618 |
| 242681_at   | 2.11 | 3.59 | NAD(P)H dehydrogenase, quinone 1                                                               | NM_000903 ///<br>NM_001025433<br>///<br>NM_001025434                                         | NQO1     |
| 213388_at   | 2.11 | 2.59 | phosphodiesterase 4D interacting protein (myomegalin)                                          | NM_001002810<br>///<br>NM_001002811<br>///<br>NM_001002812<br>/// NM_014644<br>/// NM_022359 | PDE4DIP  |
| 203815_at   | 2.11 | 1.89 | glutathione S-transferase theta 1                                                              | NM_000853                                                                                    | GSTT1    |
| 1557113_at  | 2.11 | 2.51 |                                                                                                |                                                                                              |          |
| 217787_s_at | 2.10 | 2.33 | UDP-N-acetyl-alpha-D-galactosamine:polypeptide N-acetylgalactosaminyltransferase 2 (GalNAc-T2) | NM_004481                                                                                    | GALNT2   |

|              |      |      |                                                                                                         |                                                                               |               |
|--------------|------|------|---------------------------------------------------------------------------------------------------------|-------------------------------------------------------------------------------|---------------|
| 213069_at    | 2.10 | 1.94 | <i>HEG homolog 1 (zebrafish)</i>                                                                        | XM_087386                                                                     | HEG1          |
| 241803_s_at  | 2.10 | 1.94 | <i>cyldromatosis (turban tumor syndrome)</i>                                                            | NM_001042355                                                                  | CYLD          |
| 222142_at    | 2.09 | 3.23 |                                                                                                         | ///<br>NM_001042412<br>///<br>NM_015247                                       |               |
| 208782_at    | 2.09 | 2.47 | <i>follistatin-like 1</i>                                                                               | NM_007085                                                                     | FSTL1         |
| 219383_at    | 2.09 | 1.96 | <i>mastermind-like 2 (Drosophila)</i>                                                                   | NM_024841                                                                     | MAML2         |
| 242405_at    | 2.09 | 1.93 |                                                                                                         | NM_032427                                                                     |               |
| 236948_x_at  | 2.09 | 2.74 | <i>splicing factor, arginine/serine-rich 11</i>                                                         | NM_004768                                                                     | SFRS11        |
| 230906_at    | 2.08 | 2.07 | <i>UDP-N-acetyl-alpha-D-galactosamine:polypeptide N-acetylgalactosaminyltransferase 10 (GalNAc-T10)</i> | NM_017540 ///<br>NM_198321                                                    | GALNT10       |
| 204635_at    | 2.08 | 2.13 | <i>ribosomal protein S6 kinase, 90kDa, polypeptide 5</i>                                                | NM_004755 ///<br>NM_182398                                                    | RPS6KA5       |
| 240271_at    | 2.07 | 1.83 | <i>myotubularin related protein 3</i>                                                                   | NM_021090 ///<br>NM_153050 ///<br>NM_153051                                   | MTMR3         |
| 244404_at    | 2.07 | 3.02 | <i>syntaxin binding protein 4</i>                                                                       | NM_178509                                                                     | STXBP4        |
| 233377_at    | 2.07 | 2.64 | <i>AT rich interactive domain 5B (MRF1-like)</i>                                                        | NM_032199                                                                     | ARID5B        |
| 243952_at    | 2.07 | 2.25 | <i>ecotropic viral integration site 1</i>                                                               | NM_005241                                                                     | EVI1          |
| 226420_at    | 2.07 | 2.86 |                                                                                                         |                                                                               |               |
| 212822_at    | 2.07 | 2.57 | <i>HEG homolog 1 (zebrafish)</i>                                                                        | XM_087386                                                                     | HEG1          |
| 238297_at    | 2.07 | 2.16 | <i>phosphatase and actin regulator 1</i>                                                                | NM_030948                                                                     | PHACTR1       |
| 225875_s_at  | 2.06 | 1.77 | <i>NIPA-like domain containing 3</i>                                                                    | NM_020448                                                                     | NPAL3         |
| 1562403_a_at | 2.06 | 1.78 | <i>solute carrier family 8 (sodium-calcium exchanger), member 3</i>                                     | NM_033262 ///<br>NM_058240 ///<br>NM_182932 ///<br>NM_182936 ///<br>NM_183002 | SLC8A3        |
| 239600_at    | 2.06 | 3.34 | <i>signal-induced proliferation-associated 1 like 1</i>                                                 | NM_015556                                                                     | SIPA1L1       |
| 221286_s_at  | 2.05 | 2.31 | <i>F-box and WD repeat trophoblast glycoprotein</i>                                                     | NM_016459                                                                     | FBXW2<br>TPBG |
| 241736_at    | 2.05 | 5.55 |                                                                                                         | NM_012164                                                                     |               |
| 203476_at    | 2.05 | 3.55 |                                                                                                         | NM_006670                                                                     |               |
| 225344_at    | 2.05 | 2.25 | <i>nuclear receptor coactivator 7</i>                                                                   | NM_181782                                                                     | NCOA7         |

|              |      |      |                                                                                       |                                                                             |          |
|--------------|------|------|---------------------------------------------------------------------------------------|-----------------------------------------------------------------------------|----------|
| 205801_s_at  | 2.05 | 2.02 | RAS guanyl releasing protein 3 (calcium and DAG-regulated)                            | NM_170672                                                                   | RASGRP3  |
| 200923_at    | 2.05 | 3.52 | lectin, galactoside-binding, soluble, 3 binding protein                               | NM_005567                                                                   | LGALS3BP |
| 208891_at    | 2.04 | 1.97 | dual specificity phosphatase 6                                                        | NM_001946 ///<br>NM_022652                                                  | DUSP6    |
| 204546_at    | 2.04 | 3.59 | KIAA0513                                                                              | NM_014732                                                                   | KIAA0513 |
| 203657_s_at  | 2.04 | 2.25 | cathepsin F                                                                           | NM_003793                                                                   | CTSF     |
| 202270_at    | 2.04 | 2.24 | guanylate binding protein 1, interferon-inducible, 67kDa                              | NM_002053                                                                   | GBP1     |
| 230064_at    | 2.03 | 1.85 |                                                                                       | XM_926797                                                                   |          |
| 203217_s_at  | 2.03 | 2.91 | ST3 beta-galactoside alpha-2,3-sialyltransferase 5                                    | NM_001042437<br>/// NM_003896                                               | ST3GAL5  |
| 210084_x_at  | 2.03 | 1.91 | tryptase alpha/beta 1                                                                 | NM_003294                                                                   | TPSAB1   |
| 231310_at    | 2.03 | 3.27 |                                                                                       |                                                                             |          |
| 212385_at    | 2.03 | 1.91 |                                                                                       |                                                                             |          |
| 1552323_s_at | 2.03 | 2.73 | family with sequence similarity 122C                                                  | NM_138819                                                                   | FAM122C  |
| 204547_at    | 2.02 | 2.31 | RAB40B, member RAS oncogene family                                                    | NM_006822                                                                   | RAB40B   |
| 223000_s_at  | 2.02 | 1.78 | F11 receptor                                                                          | NM_016946 ///<br>NM_144502 ///<br>NM_144503 ///<br>NM_144504                | F11R     |
| 1554997_a_at | 2.02 | 3.48 | prostaglandin-endoperoxide synthase 2 (prostaglandin G/H synthase and cyclooxygenase) | NM_000963                                                                   | PTGS2    |
| 204217_s_at  | 2.02 | 4.36 | reticulon 2                                                                           | NM_005619 ///<br>NM_206900 ///<br>NM_206901 ///<br>NM_206902                | RTN2     |
| 65438_at     | 2.02 | 2.18 | KIAA1609                                                                              | NM_020947                                                                   | KIAA1609 |
| 231412_at    | 2.02 | 2.04 |                                                                                       |                                                                             |          |
| 202687_s_at  | 2.01 | 2.02 | tumor necrosis factor (ligand) superfamily, member 10                                 | NM_003810                                                                   | TNFSF10  |
| 212276_at    | 2.01 | 2.09 | lipin 1                                                                               | NM_145693                                                                   | LPIN1    |
| 207837_at    | 2.01 | 5.01 | RNA binding protein with multiple splicing                                            | NM_001008710<br>///<br>NM_001008711<br>///<br>NM_001008712<br>/// NM_006867 | RBPMS    |
| 203281_s_at  | 2.01 | 2.22 | ubiquitin-like modifier                                                               | NM_003335                                                                   | UBA7     |
| 227235_at    | 2.01 | 1.88 | guanylate cyclase 1, soluble, alpha 3                                                 | NM_000856                                                                   | GUCY1A3  |

|              |      |      |                                                                            |                                                                                                |          |
|--------------|------|------|----------------------------------------------------------------------------|------------------------------------------------------------------------------------------------|----------|
| 230708_at    | 2.00 | 2.01 | <i>prickle homolog 1 (Drosophila)</i>                                      | NM_153026                                                                                      | PRICKLE1 |
| 243476_at    | 2.00 | 1.82 |                                                                            |                                                                                                |          |
| 215288_at    | 2.00 | 1.87 | <i>transient receptor potential cation channel,</i>                        | NR_002720                                                                                      | TRPC2    |
| 1570375_at   | 2.00 | 2.57 | <i>protein tyrosine phosphatase, receptor type, N polypeptide 2</i>        | NM_002847 ///<br>NM_130842 ///<br>NM_130843                                                    | PTPRN2   |
| 216278_at    | 2.00 | 2.67 |                                                                            | NM_014701                                                                                      |          |
| 225273_at    | 1.99 | 1.97 | <i>WWC family member 3</i>                                                 | NM_015691                                                                                      | WWC3     |
| 200884_at    | 1.99 | 1.80 | <i>creatine kinase, brain</i>                                              | NM_001823                                                                                      | CKB      |
| 208965_s_at  | 1.99 | 2.69 | <i>interferon, gamma-inducible protein 16</i>                              | NM_005531                                                                                      | IFI16    |
| 220030_at    | 1.99 | 4.72 | <i>serine/threonine/tyrosine kinase 1</i>                                  | NM_018423                                                                                      | STYK1    |
| 1559375_s_at | 1.98 | 2.03 | <i>ATPase, H+ transporting, lysosomal V0 subunit a1</i>                    | NM_005177                                                                                      | ATP6V0A1 |
| 210377_at    | 1.98 | 2.08 | <i>acyl-CoA synthetase medium-chain family member 3</i>                    | NM_005622 ///<br>NM_202000                                                                     | ACSM3    |
| 241446_at    | 1.98 | 2.67 | <i>ADAM metallopeptidase domain 28</i>                                     | NM_014265 ///<br>NM_021777                                                                     | ADAM28   |
| 215615_x_at  | 1.98 | 3.18 | <i>arginine-glutamic acid dipeptide (RE) repeats</i>                       | NM_001042681<br>///<br>NM_001042682<br>/// NM_012102                                           | RERE     |
| 238164_at    | 1.98 | 1.77 | <i>USP6 N-terminal like</i>                                                | XM_374768 ///<br>XM_927409 ///<br>XM_932055 ///<br>XM_938665 ///<br>XM_943796 ///<br>XM_943800 | USP6NL   |
| 232370_at    | 1.97 | 2.25 |                                                                            |                                                                                                |          |
| 1561627_at   | 1.97 | 2.58 | <i>fragile X mental retardation 1</i>                                      | NM_002024                                                                                      | FMR1     |
| 207056_s_at  | 1.97 | 2.24 | <i>solute carrier family 4, sodium bicarbonate cotransporter, member 8</i> | NM_001039960<br>/// NM_004858                                                                  | SLC4A8   |
| 242216_at    | 1.96 | 1.86 | <i>DnaJ (Hsp40) homolog, subfamily C, member 1</i>                         | NM_022365                                                                                      | DNAJC1   |
| 226823_at    | 1.96 | 2.14 | <i>phosphatase and actin regulator 4</i>                                   | NM_023923                                                                                      | PHACTR4  |
| 235761_at    | 1.96 | 1.80 |                                                                            |                                                                                                |          |
| 243386_at    | 1.96 | 3.97 |                                                                            | NM_001039183                                                                                   |          |
| 1570021_at   | 1.96 | 2.55 |                                                                            |                                                                                                |          |



|             |      |      |                                                                                                 |                                                              |           |
|-------------|------|------|-------------------------------------------------------------------------------------------------|--------------------------------------------------------------|-----------|
| 204622_x_at | 1.96 | 4.62 | nuclear receptor subfamily 4, group A, member 2                                                 | NM_006186 ///<br>NM_173171 ///<br>NM_173172 ///<br>NM_173173 | NR4A2     |
| 215342_s_at | 1.96 | 2.33 | RAB GTPase activating protein 1-like                                                            | NM_001035230<br>/// NM_014857                                | RABGAP1L  |
| 211526_s_at | 1.96 | 2.90 | regulator of telomere                                                                           | NM_016434 ///                                                | RTEL1     |
| 235094_at   | 1.96 | 1.83 | tropomyosin 4                                                                                   | NM_003290                                                    | TPM4      |
| 1568592_at  | 1.96 | 2.47 | tripartite motif-containing 69                                                                  | NM_080745 ///<br>NM_182985                                   | TRIM69    |
| 238771_at   | 1.96 | 2.32 | fibrosin                                                                                        | NM_022452                                                    | FBRS      |
| 226677_at   | 1.95 | 1.75 | zinc finger protein 521                                                                         | NM_015461                                                    | ZNF521    |
| 240180_at   | 1.94 | 2.33 |                                                                                                 |                                                              |           |
| 223849_s_at | 1.94 | 1.79 | Mov10, Moloney leukemia virus 10, homolog (mouse)                                               | NM_020963                                                    | MOV10     |
| 230624_at   | 1.94 | 2.09 | solute carrier family 25, member 27                                                             | NM_004277                                                    | SLC25A27  |
| 209576_at   | 1.93 | 2.31 | guanine nucleotide binding protein (G protein), alpha inhibiting activity polypeptide 1         | NM_002069                                                    | GNAI1     |
| 235072_s_at | 1.93 | 1.88 |                                                                                                 |                                                              |           |
| 207111_at   | 1.92 | 2.46 | egf-like module containing, mucin-like, hormone receptor-like 1                                 | NM_001974                                                    | EMR1      |
| 239278_at   | 1.92 | 2.80 |                                                                                                 |                                                              |           |
| 231557_at   | 1.92 | 8.72 |                                                                                                 |                                                              |           |
| 202708_s_at | 1.92 | 2.91 | histone cluster 2, H2be                                                                         | NM_003528                                                    | HIST2H2BE |
| 219304_s_at | 1.92 | 1.79 | platelet derived growth factor D                                                                | NM_025208 ///<br>NM_033135                                   | PDGFD     |
| 220777_at   | 1.92 | 3.06 | kinesin family member 13A                                                                       | NM_022113                                                    | KIF13A    |
| 241982_at   | 1.91 | 1.87 | TAF1 RNA polymerase II, TATA box binding protein (TBP)-associated factor, 250kDa                | NM_004606 ///<br>NM_138923                                   | TAF1      |
| 206965_at   | 1.91 | 2.26 | Kruppel-like factor 12                                                                          | NM_007249 ///<br>NM_016285                                   | KLF12     |
| 226382_at   | 1.91 | 2.25 |                                                                                                 |                                                              |           |
| 242414_at   | 1.91 | 1.92 | quinolinate phosphoribosyltransferase (nicotinate-nucleotide pyrophosphorylase (carboxylating)) | NM_014298                                                    | QPRT      |

|             |      |      |                                                                                                |                                                              |          |
|-------------|------|------|------------------------------------------------------------------------------------------------|--------------------------------------------------------------|----------|
| 242407_at   | 1.91 | 2.75 | arginine-glutamic acid dipeptide (RE) repeats                                                  | NM_001042681<br>///<br>NM_001042682<br>///<br>NM_012102      | RERE     |
| 223991_s_at | 1.90 | 1.83 | UDP-N-acetyl-alpha-D-galactosamine:polypeptide N-acetylgalactosaminyltransferase 2 (GalNAc-T2) | NM_004481                                                    | GALNT2   |
| 205888_s_at | 1.90 | 1.96 | myelin transcription factor 1-like                                                             | NM_014790 ///<br>NM_015025                                   | MYT1L    |
| 204755_x_at | 1.90 | 1.77 | hepatic leukemia factor                                                                        | NM_002126                                                    | HLF      |
| 213982_s_at | 1.90 | 1.76 | RAB GTPase activating protein 1-like                                                           | NM_001035230<br>///<br>NM_014857                             | RABGAP1L |
| 203569_s_at | 1.90 | 1.88 | oral-facial-digital syndrome 1                                                                 | NM_003611                                                    | OFD1     |
| 1557718_at  | 1.90 | 1.80 | protein phosphatase 2, regulatory subunit B', gamma isoform                                    | NM_002719 ///<br>NM_178586 ///<br>NM_178587 ///<br>NM_178588 | PPP2R5C  |
| 204633_s_at | 1.89 | 2.21 | ribosomal protein S6 kinase, 90kDa, polypeptide 5                                              | NM_004755 ///<br>NM_182398                                   | RPS6KA5  |
| 202255_s_at | 1.89 | 2.37 | signal-induced proliferation-associated 1 like 1                                               | NM_015556                                                    | SIPA1L1  |
| 236565_s_at | 1.89 | 2.04 | La ribonucleoprotein domain family, member 6                                                   | NM_018357 ///<br>NM_197958                                   | LARP6    |
| 218718_at   | 1.89 | 1.96 | platelet derived growth factor C                                                               | NM_016205                                                    | PDGFC    |
| 226808_at   | 1.89 | 1.81 |                                                                                                | XM_376720 ///<br>XM_935653 ///<br>XM_937178                  |          |
| 243928_s_at | 1.88 | 1.95 | ATP-binding cassette, sub-family C (CFTR/MRP), member 4                                        | NM_005845                                                    | ABCC4    |
| 201649_at   | 1.88 | 2.01 | ubiquitin-conjugating enzyme E2L 6                                                             | NM_004223 ///<br>NM_198183                                   | UBE2L6   |
| 202769_at   | 1.88 | 2.09 | cyclin G2                                                                                      | NM_004354                                                    | CCNG2    |
| 212592_at   | 1.88 | 5.89 | immunoglobulin J polypeptide, linker protein for immunoglobulin alpha and mu polypeptides      | NM_144646                                                    | IGJ      |
| 232636_at   | 1.88 | 4.63 | SLIT and NTRK-like family, member 4                                                            | NM_173078                                                    | SLITRK4  |

|              |      |      |                                                                                                                  |                                                                                                                                                   |          |
|--------------|------|------|------------------------------------------------------------------------------------------------------------------|---------------------------------------------------------------------------------------------------------------------------------------------------|----------|
| 234276_at    | 1.88 | 2.15 | USP6 N-terminal like                                                                                             | XM_374768 ///<br>XM_927409 ///<br>XM_932055 ///<br>XM_938665 ///<br>XM_943796 ///<br>XM_943800                                                    | USP6NL   |
| 240399_at    | 1.87 | 4.53 | triple functional domain<br>(PTPRF interacting)                                                                  | NM_007118                                                                                                                                         | TRIO     |
| 1561763_at   | 1.87 | 1.78 | KIAA2026                                                                                                         | NM_001017969                                                                                                                                      | KIAA2026 |
| 212256_at    | 1.87 | 1.85 | UDP-N-acetyl-alpha-D-<br>galactosamine:polypepti<br>de N-<br>acetylgalactosaminyltran<br>sferase 10 (GalNAc-T10) | NM_017540 ///<br>NM_198321                                                                                                                        | GALNT10  |
| 212387_at    | 1.87 | 1.86 |                                                                                                                  |                                                                                                                                                   |          |
| 1564468_at   | 1.87 | 2.29 |                                                                                                                  | NM_017884                                                                                                                                         |          |
| 244716_x_at  | 1.86 | 2.15 | transmembrane and<br>immunoglobulin domain<br>containing 2                                                       | NM_144615                                                                                                                                         | TMIGD2   |
| 235538_at    | 1.86 | 1.85 | pre-B-cell leukemia<br>homeobox 1                                                                                | NM_002585                                                                                                                                         | PBX1     |
| 203372_s_at  | 1.86 | 1.80 | suppressor of cytokine<br>signaling 2                                                                            | NM_003877                                                                                                                                         | SOCS2    |
| 216474_x_at  | 1.85 | 1.88 | tryptase alpha/beta 1                                                                                            | NM_003294                                                                                                                                         | TPSAB1   |
| 213894_at    | 1.85 | 2.14 | thrombospondin, type I,<br>domain containing 7A                                                                  | XM_371877 ///<br>XM_374404 ///<br>XM_928187 ///<br>XM_932697 ///<br>XM_935904 ///<br>XM_935905 ///<br>XM_937164 ///<br>XM_943202 ///<br>XM_943205 | THSD7A   |
| 224701_at    | 1.85 | 2.64 | poly (ADP-ribose)<br>polymerase family,<br>member 14                                                             | NM_017554                                                                                                                                         | PARP14   |
| 202988_s_at  | 1.85 | 4.87 | regulator of G-protein<br>signaling 1                                                                            | NM_002922                                                                                                                                         | RGS1     |
| 1553155_x_at | 1.85 | 2.41 | ATPase, H+<br>transporting, lysosomal<br>38kDa, V0 subunit d2                                                    | NM_152565                                                                                                                                         | ATP6V0D2 |
| 215017_s_at  | 1.85 | 1.79 | formin binding protein 1-<br>like                                                                                | NM_001024948<br>/// NM_017737                                                                                                                     | FNBP1L   |
| 1563573_at   | 1.85 | 2.02 | Rho guanine nucleotide<br>exchange factor (GEF) 3                                                                | NM_019555                                                                                                                                         | ARHGEF3  |
| 205942_s_at  | 1.85 | 1.88 | acyl-CoA synthetase<br>medium-chain family<br>member 3                                                           | NM_005622 ///<br>NM_202000                                                                                                                        | ACSM3    |

|             |      |      |                                                                              |                                                                                                                                                                                                                       |          |
|-------------|------|------|------------------------------------------------------------------------------|-----------------------------------------------------------------------------------------------------------------------------------------------------------------------------------------------------------------------|----------|
| 218501_at   | 1.84 | 2.05 | <i>Rho guanine nucleotide exchange factor (GEF) 3</i>                        | NM_019555                                                                                                                                                                                                             | ARHGEF3  |
| 239300_at   | 1.84 | 1.90 | <i>phosphoinositide-3-kinase, class 3</i>                                    | NM_002647                                                                                                                                                                                                             | PIK3C3   |
| 206385_s_at | 1.84 | 3.50 | <i>ankyrin 3, node of Ranvier (ankyrin G)</i>                                | NM_001149 ///<br>NM_020987                                                                                                                                                                                            | ANK3     |
| 221816_s_at | 1.84 | 1.88 |                                                                              | NM_001017435<br>///<br>NM_001040443<br>///<br>NM_001040444<br>/// NM_152582                                                                                                                                           |          |
| 243277_x_at | 1.84 | 2.23 | <i>ecotropic viral integration site 1</i>                                    | NM_005241                                                                                                                                                                                                             | EVI1     |
| 202124_s_at | 1.83 | 1.89 | <i>trafficking protein, kinesin binding 2</i>                                | NM_015049                                                                                                                                                                                                             | TRAK2    |
| 218085_at   | 1.83 | 1.98 | <i>chromatin modifying protein 5</i>                                         | NM_016410                                                                                                                                                                                                             | CHMP5    |
| 209426_s_at | 1.83 | 1.84 | <i>alpha-methylacyl-CoA racemase</i>                                         | NM_014324 ///<br>NM_203382                                                                                                                                                                                            | AMACR    |
| 236285_at   | 1.83 | 2.63 |                                                                              |                                                                                                                                                                                                                       |          |
| 204612_at   | 1.83 | 1.84 | <i>protein kinase (cAMP-dependent, catalytic) inhibitor alpha</i>            | NM_006823 ///<br>NM_181839                                                                                                                                                                                            | PKIA     |
| 207017_at   | 1.83 | 3.01 | <i>RAB27B, member RAS oncogene family</i>                                    | NM_001001713<br>/// NM_004163<br>/// NM_007341                                                                                                                                                                        | RAB27B   |
| 229739_s_at | 1.83 | 2.42 | <i>family with sequence similarity 116, member B</i>                         | NM_001001794                                                                                                                                                                                                          | FAM116B  |
| 201243_s_at | 1.83 | 2.19 | <i>ATPase, Na<sup>+</sup>/K<sup>+</sup> transporting, beta 1 polypeptide</i> | NM_001001787<br>/// NM_001677                                                                                                                                                                                         | ATP1B1   |
| 215881_x_at | 1.83 | 3.49 | <i>synovial sarcoma, X breakpoint 3</i>                                      | NM_003147 ///<br>NM_005636 ///<br>NM_021014 ///<br>NM_173358 ///<br>NM_174962 ///<br>NM_175698 ///<br>NM_175711 ///<br>NM_175729 ///<br>XM_925889 ///<br>XM_930735 ///<br>XM_937466 ///<br>XM_941508 ///<br>XM_942177 | SSX3     |
| 44790_s_at  | 1.83 | 4.69 | <i>chromosome 13 open reading frame 18</i>                                   | NM_025113                                                                                                                                                                                                             | C13orf18 |
| 227243_s_at | 1.83 | 2.96 | <i>early B-cell factor 3</i>                                                 | NM_001005463                                                                                                                                                                                                          | EBF3     |

|              |      |       |                                                                                        |                            |         |
|--------------|------|-------|----------------------------------------------------------------------------------------|----------------------------|---------|
| 228003_at    | 1.81 | 1.85  | <i>RAB30, member RAS oncogene family</i>                                               | NM_014488                  | RAB30   |
| 241421_at    | 1.81 | 2.34  |                                                                                        |                            |         |
| 203921_at    | 1.81 | 2.11  | <i>carbohydrate (N-acetylglucosamine-6-O) sulfotransferase 2</i>                       | NM_004267                  | CHST2   |
| 202808_at    | 1.80 | 1.81  |                                                                                        |                            |         |
| 209636_at    | 1.80 | 6.14  | <i>nuclear factor of kappa light polypeptide gene enhancer in B-cells 2 (p49/p100)</i> | NM_002502                  | NFKB2   |
| 212599_at    | 1.80 | 2.13  | <i>autism susceptibility candidate 2</i>                                               | NM_015570                  | AUTS2   |
| 1565723_at   | 1.80 | 1.80  | <i>LSM domain containing 1</i>                                                         | NM_032356                  | LSMD1   |
| 1554335_at   | 1.80 | 2.12  | <i>pleckstrin homology, Sec7 and coiled-coil domains 4</i>                             | NM_013385                  | PSCD4   |
| 237124_at    | 1.79 | 2.59  |                                                                                        |                            |         |
| 1560994_x_at | 1.79 | 2.83  |                                                                                        | XR_000581 ///<br>XR_000654 |         |
| 1564567_at   | 1.79 | 2.14  |                                                                                        |                            |         |
| 204530_s_at  | 1.79 | 2.81  | <i>thymocyte selection-associated high mobility group box</i>                          | NM_014729                  | TOX     |
| 229530_at    | 1.79 | 1.80  | <i>guanylate cyclase 1, soluble, alpha 3</i>                                           | NM_000856                  | GUCY1A3 |
| 241216_at    | 1.79 | 3.12  | <i>kinesin family member 1B</i>                                                        | NM_015074 ///<br>NM_183416 | KIF1B   |
| 229506_at    | 1.78 | 2.43  |                                                                                        |                            |         |
| 214860_at    | 1.78 | 2.82  | <i>solute carrier family 9 (sodium/hydrogen exchanger), member 7</i>                   | NM_032591                  | SLC9A7  |
| 205091_x_at  | 1.78 | 1.80  | <i>RecQ protein-like (DNA helicase Q1-like)</i>                                        | NM_002907 ///<br>NM_032941 | RECQL   |
| 1555122_at   | 1.78 | 2.16  | <i>G protein-coupled receptor 125</i>                                                  | NM_145290                  | GPR125  |
| 241762_at    | 1.77 | 32.63 | <i>F-box protein 32</i>                                                                | NM_058229 ///<br>NM_148177 | FBXO32  |
| 226675_s_at  | 1.77 | 1.76  | <i>metastasis associated lung adenocarcinoma transcript 1 (non-protein coding)</i>     | NR_002819                  | MALAT1  |
| 212045_at    | 1.77 | 1.79  | <i>golgi apparatus protein 1</i>                                                       | NM_012201                  | GLG1    |
| 1569540_at   | 1.77 | 2.01  |                                                                                        |                            |         |
| 202889_x_at  | 1.77 | 1.83  | <i>microtubule-associated protein 7</i>                                                | NM_003980                  | MAP7    |

|              |      |      |                                                      |                                                                                                                                                   |          |                            |        |
|--------------|------|------|------------------------------------------------------|---------------------------------------------------------------------------------------------------------------------------------------------------|----------|----------------------------|--------|
| 244689_at    | 1.76 | 2.25 | peroxisome proliferator-activated receptor alpha     | NM_001001928<br>///<br>NM_001001929<br>///<br>NM_001001930<br>///<br>NM_005036<br>///<br>NM_032644                                                | PPARA    |                            |        |
| 1553611_s_at | 1.76 | 3.32 | cadherin 3, type 1, P-cadherin (placental)           | NM_001039548                                                                                                                                      | CDH3     |                            |        |
| 241818_at    | 1.76 | 2.47 |                                                      | NM_133458                                                                                                                                         |          |                            |        |
| 201468_s_at  | 1.76 | 1.84 |                                                      | NM_000903 ///<br>NM_001025433<br>///<br>NM_001025434                                                                                              |          | NQO1                       |        |
| 202600_s_at  | 1.76 | 1.75 | nuclear receptor interacting protein 1               | NM_003489                                                                                                                                         | NRIP1    |                            |        |
| 201418_s_at  | 1.76 | 1.77 | SRY (sex determining region Y)-box 4                 | NM_003107                                                                                                                                         | SOX4     |                            |        |
| 243463_s_at  | 1.76 | 1.81 | Ras-like without CAAX 1                              | NM_006912                                                                                                                                         | RIT1     |                            |        |
| 1561310_at   | 1.75 | 2.23 | USP6 N-terminal like                                 | XM_374768 ///<br>XM_927409 ///<br>XM_932055 ///<br>XM_938665 ///<br>XM_943796 ///<br>XM_943800                                                    | USP6NL   |                            |        |
| 241750_x_at  | 1.75 | 1.79 |                                                      |                                                                                                                                                   |          |                            |        |
| 209060_x_at  | 1.75 | 2.14 |                                                      | nuclear receptor coactivator 3                                                                                                                    |          | NM_006534 ///<br>NM_181659 | NCOA3  |
| 1556682_s_at | 1.75 | 3.03 |                                                      | autism susceptibility                                                                                                                             |          | NM_015570                  | AUTS2  |
| 228243_at    | 1.75 | 2.04 |                                                      | PAX interacting (with transcription-activation domain) protein 1                                                                                  |          | NM_007349                  | PAXIP1 |
| 205411_at    | 1.75 | 1.97 | serine/threonine kinase 4                            | NM_006282                                                                                                                                         | STK4     |                            |        |
| 223595_at    | 1.75 | 7.26 | transmembrane protein 133                            | NM_032021                                                                                                                                         | TMEM133  |                            |        |
| 244611_at    | 1.75 | 1.74 | mediator complex subunit 13                          | NM_005121                                                                                                                                         | MED13    |                            |        |
| 224378_x_at  | 1.75 | 1.95 | microtubule-associated protein 1 light chain 3 alpha | NM_032514 ///<br>NM_181509                                                                                                                        | MAP1LC3A |                            |        |
| 235508_at    | 1.75 | 1.91 | promyelocytic leukemia                               | NM_002675 ///<br>NM_033238 ///<br>NM_033239 ///<br>NM_033240 ///<br>NM_033244 ///<br>NM_033246 ///<br>NM_033247 ///<br>NM_033249 ///<br>NM_033250 | PML      |                            |        |

|              |       |       |                                                           |                                                              |         |
|--------------|-------|-------|-----------------------------------------------------------|--------------------------------------------------------------|---------|
| 226029_at    | 1.75  | 4.33  | <i>vang-like 2 (van gogh, Drosophila)</i>                 | NM_020335                                                    | VANGL2  |
| 235173_at    | 1.74  | 1.87  |                                                           | XM_379228 ///<br>XM_944985                                   |         |
| 213665_at    | 1.74  | 2.69  | <i>SRY (sex determining region Y)-box 4</i>               | NM_003107                                                    | SOX4    |
| 208268_at    | 1.74  | 2.70  | <i>ADAM metallopeptidase domain 28</i>                    | NM_014265 ///<br>NM_021777                                   | ADAM28  |
| 237100_at    | 1.74  | 2.50  | <i>janus kinase and microtubule interacting protein 2</i> | NM_014790                                                    | JAKMIP2 |
| 216129_at    | 1.74  | 2.58  | <i>ATPase, class II, type 9A</i>                          | NM_006045                                                    | ATP9A   |
| 1554768_a_at | -1.74 | -2.12 | <i>MAD2 mitotic arrest</i>                                | NM_002358                                                    | MAD2L1  |
| 217948_at    | -1.74 | -4.36 |                                                           |                                                              |         |
| 241846_at    | -1.75 | -2.05 | <i>HLA complex group 18</i>                               | XM_933653 ///<br>XM_936164 ///<br>XM_944855                  | HCG18   |
| 1554892_a_at | -1.75 | -2.68 | <i>membrane-spanning 4-domains, subfamily A,</i>          | NM_001031666<br>///                                          | MS4A3   |
| 1553849_at   | -1.76 | -2.23 | <i>coiled-coil domain containing 26</i>                   |                                                              | CCDC26  |
| 1562940_at   | -1.76 | -3.50 |                                                           |                                                              |         |
| 230266_at    | -1.77 | -1.85 | <i>RAB7B, member RAS oncogene family</i>                  | NM_177403                                                    | RAB7B   |
| 1569189_at   | -1.78 | -2.60 | <i>tetratricopeptide repeat domain 9C</i>                 | NM_173810                                                    | TTC9C   |
| 222462_s_at  | -1.78 | -1.75 | <i>beta-site APP-cleaving enzyme 1</i>                    | NM_012104 ///<br>NM_138971 ///<br>NM_138972 ///<br>NM_138973 | BACE1   |
| 244049_at    | -1.78 | -1.75 |                                                           |                                                              |         |
| 220926_s_at  | -1.80 | -1.88 |                                                           | NM_025191 ///<br>XM_930112 ///<br>XM_940489                  |         |
| 218445_at    | -1.80 | -2.04 | <i>H2A histone family, member Y2</i>                      | NM_018649                                                    | H2AFY2  |
| 211745_x_at  | -1.80 | -1.87 | <i>hemoglobin, alpha 1</i>                                | NM_000558                                                    | HBA1    |
| 204446_s_at  | -1.80 | -2.48 | <i>arachidonate 5-lipoxygenase</i>                        | NM_000698                                                    | ALOX5   |
| 209201_x_at  | -1.81 | -1.92 | <i>chemokine (C-X-C motif) receptor 4</i>                 | NM_001008540<br>/// NM_003467                                | CXCR4   |
| 1553725_s_at | -1.81 | -1.88 | <i>zinc finger protein 644</i>                            | NM_016620 ///                                                | ZNF644  |
| 213744_at    | -1.83 | -2.85 | <i>attractin-like 1</i>                                   | NM_207303                                                    | ATRNL1  |
| 223452_s_at  | -1.84 | -1.81 |                                                           | NM_015459                                                    |         |
| 1554676_at   | -1.84 | -2.04 | <i>serglycin</i>                                          | NM_002727                                                    | SRGN    |
| 209458_x_at  | -1.84 | -1.99 | <i>hemoglobin, alpha 1</i>                                | NM_000517 ///<br>NM_000558                                   | HBA1    |
| 214627_at    | -1.84 | -2.74 | <i>eosinophil peroxidase</i>                              | NM_000502                                                    | EPX     |

|              |       |        |                                                                            |                                                                               |          |
|--------------|-------|--------|----------------------------------------------------------------------------|-------------------------------------------------------------------------------|----------|
| 212478_at    | -1.86 | -1.94  | required for meiotic nuclear division 5 homolog A ( <i>S. cerevisiae</i> ) | NM_022780                                                                     | RMND5A   |
| 217369_at    | -1.86 | -14.55 | immunoglobulin heavy constant gamma 1 (G1m marker)                         | XM_370973                                                                     | IGHG1    |
| 230645_at    | -1.86 | -2.01  | FERM domain containing 3                                                   | NM_174938                                                                     | FRMD3    |
| 206034_at    | -1.86 | -2.37  | serpin peptidase inhibitor, clade B (ovalbumin), member 8                  | NM_001031848<br>/// NM_002640<br>/// NM_198833                                | SERPINB8 |
| 238596_at    | -1.87 | -1.84  | chromosome 10 open reading frame 4                                         | NM_145246 ///<br>NM_203438 ///<br>NM_203439 ///<br>NM_203440 ///<br>NM_203441 | C10orf4  |
| 231234_at    | -1.87 | -2.07  | cathepsin C                                                                | NM_001814 ///<br>NM_148170                                                    | CTSC     |
| 1569362_at   | -1.88 | -2.81  | activated leukocyte cell                                                   | NM_001627                                                                     | ALCAM    |
| 1569114_at   | -1.89 | -1.83  |                                                                            |                                                                               |          |
| 217414_x_at  | -1.89 | -1.85  | hemoglobin, alpha 1                                                        | NM_000517 ///<br>NM_000558                                                    | HBA1     |
| 205786_s_at  | -1.89 | -1.75  | integrin, alpha M (complement component 3 receptor 3 subunit)              | NM_000632                                                                     | ITGAM    |
| 229485_x_at  | -1.89 | -3.19  | shisa homolog 3 ( <i>Xenopus laevis</i> )                                  | XM_496688 ///<br>XM_941105                                                    | SHISA3   |
| 206277_at    | -1.90 | -1.87  | purinergic receptor P2Y, G-protein coupled, 2                              | NM_002564 ///<br>NM_176071 ///<br>NM_176072                                   | P2RY2    |
| 224799_at    | -1.90 | -2.82  | Nedd4 family interacting protein 2                                         | NM_019080                                                                     | NDFIP2   |
| 1558230_at   | -1.91 | -1.75  | splicing factor 3b, subunit 2, 145kDa                                      | NM_006842                                                                     | SF3B2    |
| 1569629_x_at | -1.91 | -2.04  |                                                                            | XM_928240 ///<br>XM_942518                                                    |          |
| 214414_x_at  | -1.92 | -2.26  | hemoglobin, alpha 2                                                        | NM_000517                                                                     | HBA2     |
| 213174_at    | -1.92 | -1.86  | tetratricopeptide repeat domain 9                                          | XM_027236 ///<br>XM_938197                                                    | TTC9     |
| 207219_at    | -1.92 | -1.99  | zinc finger protein 643                                                    | NM_023070                                                                     | ZNF643   |
| 1556735_at   | -1.93 | -8.56  |                                                                            |                                                                               |          |
| 234624_at    | -1.93 | -2.03  | HERV-H LTR-associating 2                                                   | NM_007072                                                                     | HHLA2    |
| 230170_at    | -1.93 | -1.88  | oncostatin M                                                               | NM_020530                                                                     | OSM      |
| 236199_at    | -1.93 | -2.79  | arachidonate 5-lipoxygenase                                                | NM_000698                                                                     | ALOX5    |
| 201404_x_at  | -1.96 | -1.91  | proteasome (prosome, macropain) subunit, beta type, 2                      | NM_002794                                                                     | PSMB2    |



|              |       |        |                                                                         |                                                         |         |
|--------------|-------|--------|-------------------------------------------------------------------------|---------------------------------------------------------|---------|
| 235220_at    | -1.97 | -1.78  | <i>Yip1 domain family, member 4</i>                                     | NM_032312                                               | YIPF4   |
| 242170_at    | -1.97 | -2.68  | <i>zinc finger protein 154</i>                                          |                                                         | ZNF154  |
| 223758_s_at  | -1.98 | -1.85  | <i>general transcription factor IIH, polypeptide 2, 44kDa</i>           | NM_001515                                               | GTF2H2  |
| 1557775_a_at | -1.98 | -3.48  | <i>RAN binding protein 17</i>                                           | NM_022897                                               | RANBP17 |
| 236655_at    | -1.99 | -2.01  | <i>tumor protein D52</i>                                                | NM_001025252<br>///<br>NM_001025253<br>///<br>NM_005079 | TPD52   |
| 1558807_at   | -1.99 | -2.25  | <i>ATPase family, AAA</i>                                               | XM_039676 ///                                           | ATAD2B  |
| 229352_at    | -1.99 | -16.50 | <i>NADPH oxidase, EF-hand calcium binding domain 5</i>                  | NM_145658                                               | NOX5    |
| 213561_at    | -2.01 | -1.88  | <i>ASF1 anti-silencing function 1 homolog A (S. cerevisiae)</i>         | NM_014034                                               | ASF1A   |
| 1554367_at   | -2.01 | -2.10  | <i>family with sequence similarity 26, member C</i>                     | NM_001001412                                            | FAM26C  |
| 231992_x_at  | -2.02 | -1.82  |                                                                         | NR_002933                                               |         |
| 234807_x_at  | -2.03 | -1.97  |                                                                         |                                                         |         |
| 205919_at    | -2.05 | -5.67  | <i>hemoglobin, epsilon 1</i>                                            | NM_005330                                               | HBE1    |
| 217364_x_at  | -2.05 | -1.95  | <i>eukaryotic translation initiation factor 3, subunit J</i>            | NM_003758                                               | EIF3J   |
| 1560001_at   | -2.06 | -28.04 |                                                                         | NM_001012988                                            |         |
| 214575_s_at  | -2.06 | -1.94  | <i>azurocidin 1 (cationic antimicrobial protein 37)</i>                 | NM_001700                                               | AZU1    |
| 238407_at    | -2.07 | -4.82  | <i>capping protein (actin filament) muscle Z-line, alpha 1</i>          | NM_006135                                               | CAPZA1  |
| 1563445_x_at | -2.07 | -2.07  | <i>cathepsin L-like 3</i>                                               |                                                         | CTSLL3  |
| 220859_at    | -2.08 | -2.77  |                                                                         |                                                         |         |
| 211298_s_at  | -2.08 | -9.06  | <i>albumin</i>                                                          | NM_000477                                               | ALB     |
| 238748_at    | -2.09 | -9.20  | <i>RAD18 homolog (S. cerevisiae)</i>                                    | NM_020165                                               | RAD18   |
| 1555963_x_at | -2.09 | -2.17  | <i>UDP-GlcNAc:betaGal beta-1,3-N-acetylglucosaminyltransferase 7</i>    | NM_145236                                               | B3GNT7  |
| 212009_s_at  | -2.10 | -1.83  | <i>stress-induced-phosphoprotein 1 (Hsp70/Hsp90-organizing protein)</i> | NM_006819                                               | STIP1   |
| 1560774_at   | -2.10 | -1.91  | <i>ribosomal protein SA</i>                                             | NM_001012321<br>///<br>NM_002295                        | RPSA    |

|              |       |        |                                                                          |                                             |         |
|--------------|-------|--------|--------------------------------------------------------------------------|---------------------------------------------|---------|
| 230931_at    | -2.12 | -26.11 |                                                                          |                                             |         |
| 210870_s_at  | -2.13 | -2.66  | <i>epilepsy, progressive myoclonus type 2A, Lafora disease (laforin)</i> | NM_001018041<br>/// NM_005670               | EPM2A   |
| 226171_at    | -2.15 | -1.92  |                                                                          | XM_933464 ///<br>XM_944968                  |         |
| 230147_at    | -2.15 | -2.62  | <i>coagulation factor II (thrombin) receptor-like 2</i>                  | NM_004101                                   | F2RL2   |
| 244009_at    | -2.16 | -17.43 | <i>calcium modulating ligand</i>                                         | NM_001745                                   | CAMLG   |
| 217696_at    | -2.17 | -1.96  | <i>fucosyltransferase 7 (alpha (1,3) fucosyltransferase)</i>             | NM_004479                                   | FUT7    |
| 221212_x_at  | -2.22 | -1.74  | <i>polybromo 1</i>                                                       | NM_018165 ///<br>NM_018313 ///<br>NM_181042 | PBRM1   |
| 1567081_x_at | -2.24 | -1.89  | <i>calmodulin-like 4</i>                                                 | NM_017882                                   | CALML4  |
| 232589_at    | -2.24 | -2.09  |                                                                          |                                             |         |
| 230659_at    | -2.25 | -2.00  | <i>ER degradation enhancer, mannosidase alpha-like 1</i>                 | NM_014674                                   | EDEM1   |
| 1559293_x_at | -2.28 | -1.85  | <i>chromosome 9 open reading frame 14</i>                                | XM_376821 ///<br>XM_938938                  | C9orf14 |
| 214366_s_at  | -2.29 | -2.95  | <i>arachidonate 5-lipoxygenase</i>                                       | NM_000698                                   | ALOX5   |
| 242630_at    | -2.30 | -1.83  | <i>coiled-coil domain containing 138</i>                                 | NM_144978                                   | CCDC138 |
| 212230_at    | -2.30 | -2.42  | <i>phosphatidic acid phosphatase type 2B</i>                             | NM_003713 ///<br>NM_177414                  | PPAP2B  |
| 1557703_at   | -2.31 | -4.22  | <i>membrane-associated ring finger (C3HC4) 7</i>                         | NM_022826                                   | 7-Mar   |
| 1558014_s_at | -2.34 | -2.20  | <i>male sterility domain</i>                                             | NM_032228                                   | MLSTD2  |
| 228268_at    | -2.35 | -2.46  | <i>flavin containing monooxygenase 2 (non-functional)</i>                | NM_001460                                   | FMO2    |
| 216063_at    | -2.36 | -3.07  | <i>hemoglobin, beta pseudogene 1</i>                                     | NR_001589                                   | HBBP1   |
| 208116_s_at  | -2.41 | -1.84  | <i>mannosidase, alpha, class 1A, member 1</i>                            | NM_005907                                   | MAN1A1  |
| 206871_at    | -2.46 | -2.42  | <i>elastase 2, neutrophil</i>                                            | NM_001972                                   | ELA2    |
| 207247_s_at  | -2.47 | -2.09  | <i>zinc finger protein, X-linked</i>                                     | NM_003410 ///<br>NM_003411                  | ZFX     |
| 243948_at    | -2.56 | -2.43  |                                                                          |                                             |         |
| 1562904_s_at | -2.58 | -1.91  |                                                                          | XM_496963 ///                               |         |
| 1555970_at   | -2.59 | -2.15  |                                                                          |                                             |         |
| 204848_x_at  | -2.60 | -2.28  | <i>hemoglobin, gamma A</i>                                               | NM_000184 ///<br>NM_000559                  | HBG1    |
| 204419_x_at  | -2.63 | -2.31  | <i>hemoglobin, gamma A</i>                                               | NM_000184 ///<br>NM_000559                  | HBG1    |
| 1555775_a_at | -2.65 | -1.76  | <i>zygote arrest 1</i>                                                   | NM_175619 ///                               | ZAR1    |

|             |       |        |                                                                       |                                                                                                                                                                                     |           |
|-------------|-------|--------|-----------------------------------------------------------------------|-------------------------------------------------------------------------------------------------------------------------------------------------------------------------------------|-----------|
| 214462_at   | -2.71 | -1.91  | suppressor of cytokine signaling 6                                    | NM_004232                                                                                                                                                                           | SOCS6     |
| 221634_at   | -2.73 | -1.82  | ribosomal protein L23a pseudogene 7                                   | NR_000029                                                                                                                                                                           | RPL23AP7  |
| 241060_x_at | -2.75 | -1.93  | tetraspanin 5                                                         | NM_005723                                                                                                                                                                           | TSPAN5    |
| 213515_x_at | -2.76 | -2.02  | hemoglobin, gamma A                                                   | NM_000184 ///<br>NM_000559                                                                                                                                                          | HBG1      |
| 214539_at   | -2.79 | -6.70  | serpin peptidase inhibitor, clade B (ovalbumin), member 10            | NM_005024                                                                                                                                                                           | SERPINB10 |
| 219915_s_at | -2.91 | -1.80  | solute carrier family 16, member 10 (aromatic amino acid transporter) | NM_018593                                                                                                                                                                           | SLC16A10  |
| 1552910_at  | -2.94 | -2.71  | sialic acid binding Ig-like lectin 11                                 | NM_052884                                                                                                                                                                           | SIGLEC11  |
| 206390_x_at | -3.01 | -3.06  | platelet factor 4 (chemokine (C-X-C motif) ligand 4)                  | NM_002619                                                                                                                                                                           | PF4       |
| 220811_at   | -3.22 | -20.39 | proteoglycan 3                                                        | NM_006093                                                                                                                                                                           | PRG3      |
| 235754_at   | -3.34 | -3.42  | hemochromatosis                                                       | NM_000410 ///<br>NM_139002 ///<br>NM_139003 ///<br>NM_139004 ///<br>NM_139005 ///<br>NM_139006 ///<br>NM_139007 ///<br>NM_139008 ///<br>NM_139009 ///<br>NM_139010 ///<br>NM_139011 | HFE       |
| 242753_x_at | -3.37 | -2.46  | chromosome 4 open reading frame 16                                    | NM_018569                                                                                                                                                                           | C4orf16   |
| 242284_at   | -3.50 | -3.48  |                                                                       | XM_378866 ///<br>XM_945515                                                                                                                                                          |           |
| 205987_at   | -3.62 | -2.15  | CD1c molecule                                                         | NM_001765                                                                                                                                                                           | CD1C      |
| 207717_s_at | -3.72 | -3.22  | plakophilin 2                                                         | NM_001005242<br>/// NM_004572                                                                                                                                                       | PKP2      |
| 215784_at   | -3.87 | -1.85  | CD1e molecule                                                         | NM_001042583<br>///<br>NM_001042584<br>///<br>NM_001042585<br>///<br>NM_001042586<br>///<br>NM_001042587<br>/// NM_030893                                                           | CD1E      |
| 239751_at   | -3.91 | -2.57  |                                                                       |                                                                                                                                                                                     |           |
| 220726_at   | -3.97 | -3.16  |                                                                       |                                                                                                                                                                                     |           |

|              |        |        |                                                                                                    |               |          |
|--------------|--------|--------|----------------------------------------------------------------------------------------------------|---------------|----------|
| 205863_at    | -4.02  | -2.46  | S100 calcium binding protein A12                                                                   | NM_005621     | S100A12  |
| 241005_at    | -4.29  | -7.03  |                                                                                                    |               |          |
| 226188_at    | -4.34  | -2.51  |                                                                                                    | NM_014181     |          |
| 240609_at    | -4.48  | -1.95  |                                                                                                    |               |          |
| 206682_at    | -4.69  | -1.99  | C-type lectin domain                                                                               | NM_006344 /// | CLEC10A  |
| 242618_at    | -4.76  | -2.09  | HLA complex group 18                                                                               | XM_933653 /// | HCG18    |
|              |        |        |                                                                                                    | XM_936164 /// |          |
|              |        |        |                                                                                                    | XM_944855     |          |
| 206647_at    | -4.84  | -27.94 | hemoglobin, zeta                                                                                   | NM_005332     | HBZ      |
| 216317_x_at  | -5.39  | -8.92  | Rh blood group, CcEe antigens                                                                      | NM_020485 /// | RHCE     |
|              |        |        |                                                                                                    | NM_138616 /// |          |
|              |        |        |                                                                                                    | NM_138617 /// |          |
|              |        |        |                                                                                                    | NM_138618     |          |
| 222943_at    | -5.50  | -14.07 | glucosidase, beta, acid 3 (cytosolic)                                                              | NM_020973     | GBA3     |
| 237835_at    | -5.56  | -3.11  |                                                                                                    |               |          |
| 217537_x_at  | -5.56  | -2.98  |                                                                                                    |               |          |
| 215415_s_at  | -5.66  | -1.78  | lysosomal trafficking regulator                                                                    | NM_000081 /// | LYST     |
|              |        |        |                                                                                                    | NM_001005736  |          |
| 207096_at    | -6.31  | -1.78  | serum amyloid A4, constitutive                                                                     | NM_006512     | SAA4     |
| 241104_at    | -6.41  | -8.64  | sorbin and SH3 domain containing 2                                                                 | NM_003603 /// | SORBS2   |
|              |        |        |                                                                                                    | NM_021069     |          |
| 232546_at    | -6.85  | -2.03  | tumor protein p73                                                                                  | NM_005427     | TP73     |
| 230503_at    | -7.69  | -1.80  | sterile alpha motif domain containing 4A                                                           | NM_015589     | SAMD4A   |
| 226697_at    | -9.76  | -2.61  | family with sequence similarity 114, member A1                                                     | NM_138389     | FAM114A1 |
| 1555340_x_at | -10.49 | -11.86 | RAP1A, member of RAS                                                                               | NM_001010935  | RAP1A    |
| 211551_at    | -10.70 | -8.95  | epidermal growth factor receptor (erythroblastic leukemia viral (v-erb-b) oncogene homolog, avian) | NM_005228 /// | EGFR     |
|              |        |        |                                                                                                    | NM_201282 /// |          |
|              |        |        |                                                                                                    | NM_201283 /// |          |
|              |        |        |                                                                                                    | NM_201284     |          |
| 244762_at    | -10.71 | -2.10  | Down syndrome critical region gene 3                                                               | NM_006052     | DSCR3    |
| 1555339_at   | -11.40 | -13.48 | RAP1A, member of RAS                                                                               | NM_001010935  | RAP1A    |
| 242860_at    | -13.59 | -1.81  |                                                                                                    |               |          |
| 224533_s_at  | -14.25 | -4.84  |                                                                                                    |               |          |
| 1561340_at   | -16.13 | -1.89  |                                                                                                    |               |          |
| 1569786_at   | -45.59 | -4.94  |                                                                                                    |               |          |

---
