# Supplementary material for: Dissection of the Transformation of Primary Human Hematopoietic Cells by the Oncogene NUP98-HOXA9
Source: PubMed Central journal article supplement (PMC2725295; doi:10.1371/journal.pone.0006719), 2009-08-21
Supplement: pone.0006719.s003.pdf [file pone.0006719.s003.pdf]

**Table S3. Genes dysregulated by NUP98-HOXA9/N51S**

| Probeset I.D. | Fold Change |       | Gene Name                                                                                    | Accession Number                                     | Gene Symbol |
|---------------|-------------|-------|----------------------------------------------------------------------------------------------|------------------------------------------------------|-------------|
|               | Exp.1       | Exp.2 |                                                                                              |                                                      |             |
| 241676_x_at   | 35.43       | 4.27  |                                                                                              |                                                      |             |
| 1565920_at    | 17.29       | 2.42  |                                                                                              |                                                      |             |
| 221577_x_at   | 15.65       | 3.15  | <i>growth differentiation factor 15</i>                                                      | NM_004864                                            | GDF15       |
| 227834_at     | 14.84       | 70.14 | <i>taxilin beta</i>                                                                          | NM_153235                                            | TXLNB       |
| 240878_at     | 12.89       | 7.20  | <i>fibroblast growth factor 11</i>                                                           | NM_199339                                            | FGF11       |
| 1558404_at    | 9.67        | 4.75  |                                                                                              | XM_927425 ///<br>XM_939517 ///<br>XM_939537          |             |
| 209841_s_at   | 7.13        | 2.65  | <i>leucine rich repeat neuronal 3</i>                                                        | NM_018334                                            | LRRN3       |
| 211341_at     | 6.26        | 1.84  | <i>POU class 4 homeobox 1</i>                                                                | NM_006237                                            | POU4F1      |
| 236892_s_at   | 6.03        | 2.48  |                                                                                              |                                                      |             |
| 1557647_a_at  | 5.75        | 2.29  |                                                                                              |                                                      |             |
| 1556842_at    | 5.14        | 2.15  |                                                                                              |                                                      |             |
| 207589_at     | 4.71        | 2.79  | <i>adrenergic, alpha-1B-, receptor</i>                                                       | NM_000679                                            | ADRA1B      |
| 226279_at     | 4.23        | 1.96  | <i>protease, serine, 23</i>                                                                  | NM_007173                                            | PRSS23      |
| 229309_at     | 4.11        | 2.57  |                                                                                              |                                                      |             |
| 224156_x_at   | 4.06        | 4.07  | <i>interleukin 17 receptor B</i>                                                             | NM_018725                                            | IL17RB      |
| 1560723_at    | 3.81        | 3.58  |                                                                                              |                                                      |             |
| 234520_at     | 3.71        | 14.41 |                                                                                              |                                                      |             |
| 1569551_at    | 3.66        | 2.41  | <i>GRAM domain containing 1C</i>                                                             | NM_017577                                            | GRAMD1C     |
| 204748_at     | 3.62        | 4.16  | <i>prostaglandin-endoperoxide synthase 2 (prostaglandin G/H synthase and cyclooxygenase)</i> | NM_000963                                            | PTGS2       |
| 231909_x_at   | 3.61        | 1.74  | <i>outer dense fiber of sperm tails 2-like</i>                                               | NM_001007022<br>/// NM_020729                        | ODF2L       |
| 209870_s_at   | 3.52        | 2.10  | <i>amyloid beta (A4) precursor protein-binding, family A, member 2 (X11-like)</i>            | NM_005503                                            | APBA2       |
| 233701_at     | 3.38        | 1.92  | <i>neuropilin 1</i>                                                                          | NM_001024628<br>///<br>NM_001024629<br>/// NM_003873 | NRP1        |
| 223900_s_at   | 3.34        | 3.27  | <i>polybromo 1</i>                                                                           | NM_018165 ///<br>NM_018313 ///<br>NM_181042          | PBRM1       |

|              |      |      |                                                                                              |                                                              |          |
|--------------|------|------|----------------------------------------------------------------------------------------------|--------------------------------------------------------------|----------|
| 229756_at    | 3.32 | 2.51 | <i>inhibitor of DNA binding 2, dominant negative helix-loop-helix protein</i>                | NM_002166                                                    | ID2      |
| 1561486_at   | 3.29 | 1.89 |                                                                                              |                                                              |          |
| 206962_x_at  | 3.23 | 6.27 |                                                                                              |                                                              |          |
| 216692_at    | 3.20 | 2.34 | <i>zinc finger protein 337</i>                                                               | NM_015655                                                    | ZNF337   |
| 1554997_a_at | 3.13 | 4.59 | <i>prostaglandin-endoperoxide synthase 2 (prostaglandin G/H synthase and cyclooxygenase)</i> | NM_000963                                                    | PTGS2    |
| 211269_s_at  | 3.10 | 2.60 | <i>interleukin 2 receptor, alpha</i>                                                         | NM_000417                                                    | IL2RA    |
| 225056_at    | 3.08 | 2.32 | <i>signal-induced proliferation-associated 1 like 2</i>                                      | NM_020808                                                    | SIPA1L2  |
| 231473_at    | 3.02 | 3.22 |                                                                                              |                                                              |          |
| 233944_at    | 2.97 | 4.36 | <i>contactin associated protein-like 2</i>                                                   | NM_014141                                                    | CNTNAP2  |
| 232499_at    | 2.90 | 1.76 | <i>inositol 1,4,5-trisphosphate 3-kinase B</i>                                               | NM_002221                                                    | ITPKB    |
| 238301_at    | 2.87 | 2.36 |                                                                                              |                                                              |          |
| 215368_at    | 2.86 | 2.58 | <i>nebulin</i>                                                                               | NM_004543                                                    | NEB      |
| 231804_at    | 2.81 | 2.15 | <i>relaxin/insulin-like family peptide receptor 1</i>                                        | NM_021634                                                    | RXFP1    |
| 223884_at    | 2.75 | 1.80 | <i>opticin</i>                                                                               | NM_014359                                                    | OPTC     |
| 206401_s_at  | 2.69 | 2.84 | <i>microtubule-associated protein tau</i>                                                    | NM_005910 ///<br>NM_016834 ///<br>NM_016835 ///<br>NM_016841 | MAPT     |
| 205600_x_at  | 2.63 | 1.88 | <i>homeobox B5</i>                                                                           | NM_002147                                                    | HOXB5    |
| 238733_at    | 2.59 | 2.74 | <i>carboxypeptidase M</i>                                                                    | NM_001005502<br>/// NM_001874<br>/// NM_198320               | CPM      |
| 1561405_s_at | 2.59 | 1.98 | <i>cation channel, sperm associated 2</i>                                                    | NM_054020 ///<br>NM_172095 ///<br>NM_172097                  | CATSPER2 |
| 208436_s_at  | 2.56 | 2.02 | <i>interferon regulatory factor 7</i>                                                        | NM_001572 ///<br>NM_004029 ///<br>NM_004031                  | IRF7     |
| 204622_x_at  | 2.56 | 2.77 | <i>nuclear receptor subfamily 4, group A, member 2</i>                                       | NM_006186 ///<br>NM_173171 ///<br>NM_173172 ///<br>NM_173173 | NR4A2    |
| 213010_at    | 2.55 | 2.32 | <i>protein kinase C, delta binding protein</i>                                               | NM_145040                                                    | PRKCDBP  |
| 205749_at    | 2.55 | 2.31 | <i>cytochrome P450, family 1, subfamily A, polypeptide 1</i>                                 | NM_000499                                                    | CYP1A1   |
| 1561740_at   | 2.54 | 2.23 |                                                                                              |                                                              |          |
| 227174_at    | 2.54 | 2.89 | <i>WD repeat domain 72</i>                                                                   | NM_182758                                                    | WDR72    |

|              |      |       |                                                                   |                                                                                                |            |
|--------------|------|-------|-------------------------------------------------------------------|------------------------------------------------------------------------------------------------|------------|
| 216823_at    | 2.52 | 1.94  |                                                                   | XM_495839 ///<br>XM_926528 ///<br>XM_931362 ///<br>XM_937069 ///<br>XM_943171 ///<br>XM_943177 |            |
| 219049_at    | 2.51 | 4.00  | chondroitin sulfate N-acetylgalactosaminyltransferase 1           | NM_018371                                                                                      | CSGALNACT1 |
| 222227_at    | 2.45 | 3.94  | zinc finger protein 236                                           | NM_007345                                                                                      | ZNF236     |
| 204811_s_at  | 2.44 | 3.23  | calcium channel, voltage-dependent, alpha 2/delta subunit 2       | NM_001005505<br>/// NM_006030                                                                  | CACNA2D2   |
| 1552669_at   | 2.44 | 7.88  | protein phosphatase 1, regulatory (inhibitor) subunit 3B          | NM_024607                                                                                      | PPP1R3B    |
| 202284_s_at  | 2.41 | 2.87  | cyclin-dependent kinase inhibitor 1A (p21, Cip1)                  | NM_000389 ///<br>NM_078467                                                                     | CDKN1A     |
| 239036_at    | 2.40 | 1.85  | eukaryotic translation initiation factor 2C, 1                    | NM_012199                                                                                      | EIF2C1     |
| 242002_at    | 2.38 | 1.95  | Na <sup>+</sup> /K <sup>+</sup> transporting ATPase interacting 2 | NM_001040214                                                                                   | NKAIN2     |
| 228766_at    | 2.35 | 1.86  |                                                                   |                                                                                                |            |
| 203158_s_at  | 2.32 | 2.05  | glutaminase                                                       | NM_014905                                                                                      | GLS        |
| 214180_at    | 2.30 | 1.77  | mannosidase, alpha, class 1C, member 1                            | NM_020379                                                                                      | MAN1C1     |
| 1555122_at   | 2.28 | 2.05  | G protein-coupled receptor 125                                    | NM_145290                                                                                      | GPR125     |
| 226232_at    | 2.22 | 1.89  |                                                                   |                                                                                                |            |
| 1552715_a_at | 2.22 | 4.34  | relaxin/insulin-like family peptide receptor 1                    | NM_021634                                                                                      | RXFP1      |
| 220014_at    | 2.21 | 2.16  | proline rich 16                                                   | NM_016644                                                                                      | PRR16      |
| 244235_at    | 2.18 | 2.07  | influenza virus NS1A binding protein                              | NM_006469 ///<br>NM_016389                                                                     | IVNS1ABP   |
| 230594_at    | 2.18 | 3.06  | leucine-rich PPR-motif containing                                 | NM_133259                                                                                      | LRPPRC     |
| 211000_s_at  | 2.17 | 1.79  | interleukin 6 signal transducer (gp130, oncostatin M receptor)    | NM_002184 ///<br>NM_175767                                                                     | IL6ST      |
| 242805_at    | 2.16 | 1.99  | cyclin C                                                          | NM_001013399<br>/// NM_005190                                                                  | CCNC       |
| 227553_at    | 2.16 | 2.77  | nudE nuclear distribution gene E homolog (A. nidulans)-like 1     | NM_001025579<br>/// NM_030808                                                                  | NDEL1      |
| 217581_at    | 2.13 | 24.28 | pyruvate kinase, muscle                                           | NM_002654 ///<br>NM_182470 ///<br>NM_182471                                                    | PKM2       |
| 204439_at    | 2.13 | 6.80  | interferon-induced protein 44-like                                | NM_006820                                                                                      | IFI44L     |

|              |      |       |                                                                        |                                                              |          |
|--------------|------|-------|------------------------------------------------------------------------|--------------------------------------------------------------|----------|
| 211597_s_at  | 2.13 | 3.53  | HOP homeobox                                                           | NM_032495 ///<br>NM_139211 ///<br>NM_139212                  | HOPX     |
| 240728_at    | 2.12 | 4.06  | phospholipase C, beta 4                                                | NM_000933 ///<br>NM_182797                                   | PLCB4    |
| 242134_at    | 2.11 | 2.16  | transducin-like enhancer of<br>split 4 (E(sp1) homolog,<br>Drosophila) | NM_007005                                                    | TLE4     |
| 214688_at    | 2.09 | 2.82  |                                                                        |                                                              |          |
| 1568889_at   | 2.09 | 1.76  | Fanconi anemia,                                                        | NM_001018115                                                 | FANCD2   |
| 241604_at    | 2.09 | 6.31  | ATPase, class VI, type 11A                                             | NM_015205 ///<br>NM_032189                                   | ATP11A   |
| 214888_at    | 2.08 | 2.58  | calpain 2, (m/II) large subunit                                        | NM_001748                                                    | CAPN2    |
| 209555_s_at  | 2.07 | 2.42  | CD36 molecule<br>(thrombospondin receptor)                             | NM_000072 ///<br>NM_001001547<br>///<br>NM_001001548         | CD36     |
| 218675_at    | 2.07 | 3.04  | solute carrier family 22,<br>member 17                                 | NM_016609 ///<br>NM_020372                                   | SLG22A17 |
| 230011_at    | 2.06 | 2.14  | meiosis inhibitor 1                                                    | NM_152513                                                    | MEI1     |
| 211722_s_at  | 2.06 | 1.99  | histone deacetylase 6                                                  | NM_006044                                                    | HDAC6    |
| 233587_s_at  | 2.06 | 2.31  | signal-induced proliferation-<br>associated 1 like 2                   | NM_020808                                                    | SIPA1L2  |
| 1569688_at   | 2.05 | 2.07  | flavin containing<br>monooxygenase 5                                   | NM_001461                                                    | FMO5     |
| 224895_at    | 2.05 | 3.37  | Yes-associated protein 1,<br>65kDa                                     | NM_006106                                                    | YAP1     |
| 231412_at    | 2.05 | 1.84  | triggering receptor<br>expressed on myeloid cells 1                    | NM_018643                                                    | TREM1    |
| 219434_at    | 2.04 | 2.81  |                                                                        |                                                              |          |
| 211753_s_at  | 2.04 | 2.47  | relaxin 1                                                              | NM_006911                                                    | RLN1     |
| 1556212_x_at | 2.03 | 1.94  |                                                                        | XM_929541 ///<br>XM_941868                                   |          |
| 1563166_at   | 2.02 | 1.96  | geranylgeranyl diphosphate<br>synthase 1                               | NM_001037277<br>///<br>NM_001037278<br>/// NM_004837         | GGPS1    |
| 236799_at    | 2.01 | 1.89  | serine/threonine/tyrosine<br>kinase 1                                  | NM_020961                                                    | STYK1    |
| 221696_s_at  | 2.01 | 1.86  |                                                                        | NM_018423                                                    |          |
| 243846_x_at  | 2.01 | 1.96  |                                                                        | XM_926804                                                    |          |
| 1561328_at   | 1.99 | 11.50 |                                                                        | XM_934514 ///<br>XM_934516 ///<br>XM_945782 ///<br>XM_945783 |          |
| 233541_at    | 1.97 | 2.51  |                                                                        |                                                              |          |

|             |      |      |                                                                                                                         |                                                              |                |
|-------------|------|------|-------------------------------------------------------------------------------------------------------------------------|--------------------------------------------------------------|----------------|
| 230942_at   | 1.96 | 1.93 | CKLF-like MARVEL<br>transmembrane domain<br>containing 5                                                                | NM_001037288<br>/// NM_138460                                | CMTM5          |
| 1553080_at  | 1.94 | 9.88 | casein alpha s2-like A                                                                                                  | XM_379270 ///<br>XM_934777 ///<br>XM_943519 ///<br>XM_943523 | CSN1S2A        |
| 221679_s_at | 1.92 | 2.11 | abhydrolase domain<br>containing 6                                                                                      | NM_020676                                                    | ABHD6          |
| 206341_at   | 1.91 | 2.10 | interleukin 2 receptor, alpha                                                                                           | NM_000417                                                    | IL2RA          |
| 207486_x_at | 1.90 | 3.50 | chimerin (chimaerin) 2                                                                                                  | NM_001039936<br>/// NM_004067                                | CHN2           |
| 44783_s_at  | 1.88 | 2.60 | hairy/enhancer-of-split<br>related with YRPW motif 1                                                                    | NM_001040708<br>/// NM_012258                                | HEY1           |
| 1559573_at  | 1.86 | 2.15 | insulin-like growth factor<br>binding protein 5                                                                         | NM_000599                                                    | IGFBP5         |
| 211959_at   | 1.85 | 1.82 |                                                                                                                         |                                                              |                |
| 206932_at   | 1.85 | 3.33 | cholesterol 25-hydroxylase<br>chemokine (C-C motif)<br>ligand 28                                                        | NM_003956<br>NM_148672                                       | CH25H<br>CCL28 |
| 224240_s_at | 1.85 | 1.97 |                                                                                                                         |                                                              |                |
| 226029_at   | 1.85 | 2.59 | vang-like 2 (van gogh,<br>Drosophila)                                                                                   | NM_020335                                                    | VANGL2         |
| 240038_at   | 1.84 | 2.79 | elongation factor, RNA<br>polymerase II, 2                                                                              | NM_012081                                                    | ELL2           |
| 210200_at   | 1.84 | 1.78 | WW domain containing E3<br>ubiquitin protein ligase 2                                                                   | NM_007014 ///<br>NM_199423 ///<br>NM_199424                  | WWP2           |
| 234486_at   | 1.84 | 2.15 | olfactory receptor, family 51,<br>subfamily B, member 2                                                                 | NM_033180                                                    | OR51B2         |
| 235684_s_at | 1.83 | 1.75 | sestrin 3<br>deoxynucleotidyltransferase,<br>terminal                                                                   | NM_144665<br>NM_001017520<br>/// NM_004088                   | SESN3<br>DNMT  |
| 1566363_at  | 1.82 | 2.04 |                                                                                                                         |                                                              |                |
| 216813_at   | 1.81 | 1.76 | zinc finger protein 192<br>myxovirus (influenza virus)<br>resistance 1, interferon-<br>inducible protein p78<br>(mouse) | NM_006298<br>NM_002462                                       | ZNF192<br>MX1  |
| 206579_at   | 1.80 | 2.04 |                                                                                                                         |                                                              |                |
| 202086_at   | 1.80 | 5.88 |                                                                                                                         |                                                              |                |
| 1557120_at  | 1.80 | 7.21 | eukaryotic translation<br>elongation factor 1 alpha 1                                                                   | NM_001402                                                    | EEF1A1         |
| 206488_s_at | 1.78 | 2.41 | CD36 molecule<br>(thrombospondin receptor)                                                                              | NM_000072 ///<br>NM_001001547<br>///<br>NM_001001548         | CD36           |
| 1562103_at  | 1.78 | 2.36 | Janus kinase 1 (a protein<br>tyrosine kinase)                                                                           | NM_002227                                                    | JAK1           |

|              |       |        |                                                                                               |                                                                               |                 |
|--------------|-------|--------|-----------------------------------------------------------------------------------------------|-------------------------------------------------------------------------------|-----------------|
| 1568876_a_at | 1.77  | 3.68   |                                                                                               |                                                                               |                 |
| 242938_s_at  | 1.77  | 1.79   | forkhead box K2                                                                               | NM_004514                                                                     | FOXK2           |
| 204735_at    | 1.76  | 2.07   | phosphodiesterase 4A,<br>cAMP-specific<br>(phosphodiesterase E2<br>dunce homolog, Drosophila) | NM_006202                                                                     | PDE4A           |
| 244150_at    | 1.76  | 2.68   | structural maintenance of<br>chromosomes 1A                                                   | NM_006306                                                                     | SMC1A           |
| 215071_s_at  | 1.76  | 2.42   | histone cluster 1, H2ac                                                                       | NM_003512                                                                     | HIST1H2AC       |
| 1561181_at   | 1.75  | 2.18   | AT rich interactive domain<br>5B (MRF1-like)                                                  | NM_032199                                                                     | ARID5B          |
| 1554319_at   | 1.75  | 3.43   | ribosomal protein S6 kinase,<br>90kDa, polypeptide 5                                          | NM_004755 ///<br>NM_182398                                                    | RPS6KA5         |
| 237009_at    | 1.75  | 1.78   | CD69 molecule                                                                                 | NM_001781                                                                     | CD69            |
| 237891_at    | 1.75  | 1.96   | Mdm2 p53 binding protein<br>homolog (mouse)                                                   | NM_002392 ///<br>NM_006878 ///<br>NM_006879 ///<br>NM_006881 ///<br>NM_006882 | MDM2            |
| 222802_at    | 1.74  | 4.68   | endothelin 1                                                                                  | NM_001955                                                                     | EDN1            |
| 243724_at    | -1.75 | -2.17  |                                                                                               |                                                                               |                 |
| 219788_at    | -1.75 | -1.77  | paired immunoglobulin-like<br>type 2 receptor alpha                                           | NM_013439 ///<br>NM_178272 ///<br>NM_178273                                   | PILRA           |
| 238607_at    | -1.76 | -11.64 | zinc finger protein 342                                                                       | NM_145288                                                                     | ZNF342          |
| 204848_x_at  | -1.76 | -2.34  | hemoglobin, gamma A                                                                           | NM_000184 ///<br>NM_000559                                                    | HBG1            |
| 1555205_at   | -1.77 | -2.00  |                                                                                               |                                                                               |                 |
| 244190_at    | -1.79 | -1.77  | THAP domain containing 5                                                                      | NM_182529                                                                     | THAP5           |
| 239602_at    | -1.80 | -1.93  |                                                                                               |                                                                               |                 |
| 232760_at    | -1.80 | -1.864 | testis expressed 15<br>WD repeats and SOF1<br>domain containing                               | NM_031271<br>NM_015420                                                        | TEX15<br>WDSOF1 |
| 220843_s_at  | -1.81 | -2.57  |                                                                                               |                                                                               |                 |
| 238726_at    | -1.81 | -1.97  | ubiquitin specific peptidase<br>46                                                            | NM_022832                                                                     | USP46           |
| 1569022_a_at | -1.82 | -2.10  | phosphoinositide-3-kinase,<br>class 2, alpha polypeptide                                      | NM_002645                                                                     | PIK3C2A         |
| 205025_at    | -1.82 | -1.89  | zinc finger and BTB domain<br>containing 48                                                   | NM_005341                                                                     | ZBTB48          |
| 235675_at    | -1.82 | -2.13  | dihydrofolate reductase-like<br>1                                                             | NM_176815                                                                     | DHFRL1          |
| 1557126_a_at | -1.83 | -2.50  | phospholipase D1,<br>phosphatidylcholine-specific                                             | NM_002662                                                                     | PLD1            |
| 241104_at    | -1.83 | -2.16  | sorbin and SH3 domain<br>containing 2                                                         | NM_003603 ///<br>NM_021069                                                    | SORBS2          |
| 1570528_at   | -1.84 | -2.96  | xylosyltransferase II                                                                         | NM_022167                                                                     | XYLT2           |
| 223680_at    | -1.84 | -1.76  |                                                                                               | NM_032689 ///<br>XM_927632 ///<br>XM_940452                                   |                 |

|              |       |        |                                                                                                  |                                                      |          |
|--------------|-------|--------|--------------------------------------------------------------------------------------------------|------------------------------------------------------|----------|
| 1556783_a_at | -1.84 | -1.93  | chromosome 12 open reading frame 62                                                              | NM_032901                                            | C12orf62 |
| 213515_x_at  | -1.85 | -2.43  | hemoglobin, gamma A                                                                              | NM_000184 ///<br>NM_000559                           | HBG1     |
| 1559462_at   | -1.85 | -2.31  | protein kinase, AMP-activated, alpha 1 catalytic subunit                                         | NM_006251 ///<br>NM_206907                           | PRKAA1   |
| 214917_at    | -1.86 | -1.82  |                                                                                                  |                                                      |          |
| 202490_at    | -1.87 | -1.87  | inhibitor of kappa light polypeptide gene enhancer in B-cells, kinase complex-associated protein | NM_003640                                            | IKBKAP   |
| 1564215_at   | -1.87 | -10.47 | myosin XIX                                                                                       | NM_001033579<br>///<br>NM_001033580<br>/// NM_025109 | MYO19    |
| 204120_s_at  | -1.87 | -1.98  | adenosine kinase                                                                                 | NM_001123 ///<br>NM_006721                           | ADK      |
| 211101_x_at  | -1.89 | -2.48  | leukocyte immunoglobulin-like receptor, subfamily B (with TM and ITIM domains), member 1         | NM_006866                                            | LILRB1   |
| 221212_x_at  | -1.90 | -2.16  | polybromo 1                                                                                      | NM_018165 ///<br>NM_018313 ///<br>NM_181042          | PBRM1    |
| 1553644_at   | -1.94 | -3.34  | chromosome 14 open reading frame 49                                                              | NM_152592                                            | C14orf49 |
| 1557744_at   | -1.95 | -1.89  | hemoglobin, beta pseudogene 1                                                                    | NR_001589                                            | HBBP1    |
| 216063_at    | -1.97 | -3.08  |                                                                                                  |                                                      |          |
| 1552910_at   | -1.99 | -3.13  | sialic acid binding Ig-like lectin 11                                                            | NM_052884                                            | SIGLEC11 |
| 217369_at    | -2.01 | -6.12  | immunoglobulin heavy constant gamma 1 (G1m marker)                                               | XM_370973                                            | IGHG1    |
| 222881_at    | -2.01 | -1.90  | heparanase                                                                                       | NM_006665                                            | HPSE     |
| 211905_s_at  | -2.02 | -2.15  | integrin, beta 4                                                                                 | NM_000213 ///<br>NM_001005619<br>///<br>NM_001005731 | ITGB4    |
| 244818_at    | -2.03 | -1.91  | regulatory factor X, 3 (influences HLA class II expression)                                      | NM_002919 ///<br>NM_134428                           | RFX3     |
| 238810_at    | -2.03 | -1.74  |                                                                                                  |                                                      |          |
| 236510_at    | -2.12 | -1.93  | HLA complex group 18                                                                             | XM_933653 ///<br>XM_936164 ///<br>XM_944855          | HCG18    |
| 204589_at    | -2.15 | -3.82  | NUAK family, SNF1-like kinase, 1                                                                 | NM_014840                                            | NUAK1    |
| 1559528_at   | -2.21 | -1.79  |                                                                                                  | XM_937486                                            |          |

|              |       |        |                                                                        |                                                                                                                                                     |         |
|--------------|-------|--------|------------------------------------------------------------------------|-----------------------------------------------------------------------------------------------------------------------------------------------------|---------|
| 229157_at    | -2.31 | -3.70  | <i>amiloride binding protein 1 (amine oxidase (copper-containing))</i> | NM_001091                                                                                                                                           | ABP1    |
| 241060_x_at  | -2.31 | -3.08  | <i>tetraspanin 5</i>                                                   | NM_005723                                                                                                                                           | TSPAN5  |
| 1569566_at   | -2.32 | -3.23  | <i>TBC1 (tre-2/USP6, BUB2, cdc16) domain family, member 1</i>          | NM_015173                                                                                                                                           | TBC1D1  |
| 217662_x_at  | -2.34 | -2.31  | <i>B-cell receptor-associated protein 29</i>                           | NM_001008405<br>///<br>NM_001008406<br>///<br>NM_001008407<br>///<br>NM_018844                                                                      | BCAP29  |
| 230768_at    | -2.35 | -2.60  | <i>FERM, RhoGEF and pleckstrin domain protein 2</i>                    | NM_014808                                                                                                                                           | FARP2   |
| 1556743_at   | -2.35 | -1.96  | <i>family with sequence similarity 104, member B</i>                   | NM_138362                                                                                                                                           | FAM104B |
| 232990_at    | -2.41 | -1.86  |                                                                        |                                                                                                                                                     |         |
| 244193_at    | -2.43 | -1.82  | <i>histamine N-methyltransferase</i>                                   | NM_024902                                                                                                                                           | HNMT    |
| 228772_at    | -2.51 | -2.93  |                                                                        | NM_001024074<br>///<br>NM_001024075<br>///<br>NM_006895                                                                                             |         |
| 237835_at    | -2.66 | -5.38  | <i>Williams-Beuren syndrome chromosome region 23</i>                   | NM_001039145                                                                                                                                        | WBSCR23 |
| 221176_x_at  | -2.75 | -6.04  |                                                                        |                                                                                                                                                     |         |
| 231166_at    | -2.92 | -2.34  | <i>G protein-coupled receptor 155</i>                                  | NM_001033045<br>///<br>NM_152529                                                                                                                    | GPR155  |
| 1556697_at   | -2.93 | -10.64 | <i>GPRIN family member 3 tetraspanin 4</i>                             | NM_198281                                                                                                                                           | GPRIN3  |
| 217670_at    | -2.97 | -5.09  |                                                                        | NM_001025234<br>///<br>NM_001025235<br>///<br>NM_001025236<br>///<br>NM_001025237<br>///<br>NM_001025238<br>///<br>NM_001025239<br>///<br>NM_003271 | TSPAN4  |
| 213744_at    | -3.03 | -2.08  | <i>attractin-like 1</i>                                                | NM_207303                                                                                                                                           | ATRNL1  |
| 216377_x_at  | -3.13 | -2.74  | <i>alkaline phosphatase, placental-like 2</i>                          | NM_031313                                                                                                                                           | ALPPL2  |
| 230535_s_at  | -3.35 | -2.61  | <i>chymotrypsin-like</i>                                               | NM_001907                                                                                                                                           | CTRL    |
| 214377_s_at  | -3.54 | -2.88  |                                                                        |                                                                                                                                                     |         |
| 1560973_a_at | -3.62 | -10.32 |                                                                        |                                                                                                                                                     |         |



|              |        |        |                                                                                       |                                                                               |          |
|--------------|--------|--------|---------------------------------------------------------------------------------------|-------------------------------------------------------------------------------|----------|
| 220474_at    | -3.75  | -2.72  | solute carrier family 25<br>(mitochondrial<br>oxodicarboxylate carrier),<br>member 21 | NM_030631                                                                     | SLC25A21 |
| 242868_at    | -4.12  | -4.22  | endothelial PAS domain<br>protein 1                                                   | NM_001430                                                                     | EPAS1    |
| 229316_at    | -4.17  | -1.78  | chromosome 19 open<br>reading frame 50                                                | NM_024069                                                                     | C19orf50 |
| 235372_at    | -4.63  | -1.79  | Fc receptor-like A                                                                    | NM_032738                                                                     | FCRLA    |
| 215868_x_at  | -4.80  | -12.05 | SRY (sex determining region<br>Y)-box 5                                               | NM_006940 ///<br>NM_152989 ///<br>NM_178010                                   | SOX5     |
| 235874_at    | -4.93  | -3.06  | protease, serine, 35                                                                  | NM_153362                                                                     | PRSS35   |
| 217552_x_at  | -5.39  | -2.09  | complement component<br>(3b/4b) receptor 1 (Knops<br>blood group)                     | NM_000573 ///<br>NM_000651                                                    | CR1      |
| 207633_s_at  | -5.44  | -1.77  | muscle, skeletal, receptor<br>tyrosine kinase                                         | NM_005592                                                                     | MUSK     |
| 240609_at    | -6.23  | -2.49  |                                                                                       |                                                                               |          |
| 220931_at    | -9.85  | -4.19  |                                                                                       | XM_930060 ///<br>XM_941452                                                    |          |
| 236805_at    | -10.05 | -5.49  | chromosome 9 open reading<br>frame 96                                                 | NM_153710                                                                     | C9orf96  |
| 244767_at    | -10.39 | -12.77 |                                                                                       |                                                                               |          |
| 1557703_at   | -10.65 | -9.72  | membrane-associated ring                                                              | NM_022826                                                                     | 7-Mar    |
| 220811_at    | -10.82 | -2.57  | proteoglycan 3                                                                        | NM_006093                                                                     | PRG3     |
| 243855_at    | -13.15 | -2.73  | small nuclear<br>ribonucleoprotein<br>polypeptide N                                   | NM_003097 ///<br>NM_022805 ///<br>NM_022806 ///<br>NM_022807 ///<br>NM_022808 | SNRPN    |
| 233051_at    | -13.26 | -4.75  | SLIT and NTRK-like family,<br>member 2                                                | NM_032539                                                                     | SLITRK2  |
| 1570006_at   | -14.44 | -2.22  |                                                                                       | XM_379100 ///<br>XM_945436                                                    |          |
| 1555339_at   | -15.58 | -7.05  | RAP1A, member of RAS<br>oncogene family                                               | NM_001010935<br>/// NM_002884                                                 | RAP1A    |
| 1566046_at   | -19.53 | -1.76  | DEAH (Asp-Glu-Ala-His) box                                                            | NM_019030                                                                     | DHX29    |
| 1555340_x_at | -21.53 | -7.98  | RAP1A, member of RAS<br>oncogene family                                               | NM_001010935<br>/// NM_002884                                                 | RAP1A    |
| 206647_at    | -29.82 | -3.78  | hemoglobin, zeta                                                                      | NM_005332                                                                     | HBZ      |

---
