# Supplementary material for: Dissection of the Transformation of Primary Human Hematopoietic Cells by the Oncogene NUP98-HOXA9
Source: PubMed Central journal article supplement (PMC2725295; doi:10.1371/journal.pone.0006719), 2009-08-21
Supplement: pone.0006719.s004.pdf [file pone.0006719.s004.pdf]

**Table S4. Genes dysregulated by wild-type HOXA9**

| Probeset I.D. | Fold Change |       | Gene Name                                              | Accession Number                                                                                                                                                                                                                                                         | Gene Symbol |
|---------------|-------------|-------|--------------------------------------------------------|--------------------------------------------------------------------------------------------------------------------------------------------------------------------------------------------------------------------------------------------------------------------------|-------------|
|               | Exp.1       | Exp.2 |                                                        |                                                                                                                                                                                                                                                                          |             |
| 1552323_s_at  | 2.37        | 2.16  | family with sequence similarity 122C                   | NM_002995 ///<br>NM_003175                                                                                                                                                                                                                                               | FAM122C     |
| 1552480_s_at  | 2.70        | 2.13  | protein tyrosine phosphatase, receptor                 | NM_001753                                                                                                                                                                                                                                                                | PTPRC       |
| 1552497_a_at  | 2.96        | 3.03  | SLAM family member 6                                   | NM_003175                                                                                                                                                                                                                                                                | SLAMF6      |
| 1552732_at    | 4.38        | 1.92  | actin-binding Rho activating protein                   |                                                                                                                                                                                                                                                                          | ABRA        |
| 1552783_at    | 2.35        | 1.84  | zinc finger protein 417                                | NM_030801 ///<br>NM_177535 ///<br>NM_177537 ///<br>XM_927162 ///<br>XM_931877 ///<br>XM_931884 ///<br>XM_931888 ///<br>XM_931897 ///<br>XM_931904 ///<br>XM_931909 ///<br>XM_931916 ///<br>XM_931919 ///<br>XM_931924 ///<br>XM_931929 ///<br>XM_931936 ///<br>XM_931943 | ZNF417      |
| 1553453_at    | 1.94        | 2.95  | ankyrin repeat and Tctex1 domain containing 1          | NM_002523                                                                                                                                                                                                                                                                | ASB14       |
| 1553635_s_at  | 2.48        | 3.14  | coiled-coil domain containing 141                      | NM_000550                                                                                                                                                                                                                                                                | TCTEX1D1    |
| 1553645_at    | 20.50       | 7.29  | islet cell autoantigen 1,69kDa-like                    | NM_001649                                                                                                                                                                                                                                                                | CCDC141     |
| 1553705_a_at  | 1.98        | 2.22  | WD repeat domain 20                                    | NM_032866                                                                                                                                                                                                                                                                | ICA1L       |
| 1554205_s_at  | 2.57        | 2.57  |                                                        |                                                                                                                                                                                                                                                                          |             |
| 1554549_a_at  | 2.28        | 1.81  |                                                        | NM_001017372 ///<br>NM_014031                                                                                                                                                                                                                                            | WDR20       |
| 1554564_a_at  | 1.98        | 1.94  | coiled-coil domain containing 100                      | NM_018327                                                                                                                                                                                                                                                                | CCDC100     |
| 1554606_at    | 2.00        | 2.68  | G protein-coupled receptor 125                         | NM_001753                                                                                                                                                                                                                                                                | GPR125      |
| 1555122_at    | 3.52        | 3.07  | ATP-binding cassette, sub-family B (MDR/TAP), member 9 | NM_024336                                                                                                                                                                                                                                                                | ABCB9       |
| 1555323_at    | -1.79       | -2.02 | tubulin tyrosine ligase-anthrax toxin receptor 2       |                                                                                                                                                                                                                                                                          | TLL3        |
| 1555474_at    | 1.94        | 2.01  |                                                        | NM_153235                                                                                                                                                                                                                                                                | ANTXR2      |
| 1555536_at    | 2.27        | 2.88  |                                                        | NM_002126                                                                                                                                                                                                                                                                |             |
| 1555681_at    | 2.12        | 1.79  |                                                        |                                                                                                                                                                                                                                                                          |             |

|              |       |       |                                                           |                                                                                  |           |
|--------------|-------|-------|-----------------------------------------------------------|----------------------------------------------------------------------------------|-----------|
| 1555728_a_at | 1.79  | 2.73  | membrane-spanning 4-<br>domains, subfamily A,<br>member 4 | NM_173648                                                                        | MS4A4A    |
| 1555775_a_at | -1.96 | -2.42 | zygote arrest 1                                           | NM_001031692 ///<br>NM_005824                                                    | ZAR1      |
| 1555897_at   | 2.90  | 2.41  | amine oxidase (flavin<br>containing) domain 2             | NM_031455                                                                        | AOF2      |
| 1555932_at   | 3.18  | 6.99  | testis specific, 10                                       |                                                                                  | TSGA10    |
| 1556122_at   | 1.92  | 1.76  |                                                           | NM_001032409 ///<br>NM_002534 ///<br>NM_016816                                   |           |
| 1556170_at   | -2.15 | -2.28 | mastermind-like 3<br>(Drosophila)                         | NM_001015055 ///<br>NM_001015056 ///<br>NM_033046                                | MAML3     |
| 1556212_x_at | 2.03  | 2.46  |                                                           | NM_001040142 ///<br>NM_001040143 ///<br>NM_021007                                |           |
| 1556462_a_at | 2.36  | 3.07  | Kruppel-like factor 12                                    | NM_147189                                                                        | KLF12     |
| 1556607_at   | -5.61 | -3.11 | EH-domain containing 4                                    |                                                                                  | EHD4      |
| 1556698_a_at | 1.76  | 2.48  | GPRIN family member 3                                     | NM_001037339 ///<br>NM_001037340 ///<br>NM_001037341 ///<br>NM_002600            | GPRIN3    |
| 1556898_at   | 2.56  | 1.97  |                                                           | XM_497731                                                                        |           |
| 1556905_at   | 2.18  | 2.49  | zinc finger protein 577                                   | NM_013230 ///<br>XM_942808 ///<br>XM_942813 ///<br>XM_942817                     | ZNF577    |
| 1557113_at   | 2.66  | 2.46  |                                                           | NM_002546                                                                        |           |
| 1557126_a_at | -2.00 | -2.02 | phospholipase D1,<br>phosphatidylcholine-<br>specific     | NM_001033053 ///<br>NM_014922 ///<br>NM_033004 ///<br>NM_033006 ///<br>NM_033007 | PLD1      |
| 1557366_at   | -2.01 | -2.48 | coiled-coil domain<br>containing 144B                     | NM_013230                                                                        | CCDC144B  |
| 1557386_at   | 1.90  | 7.21  | lactase                                                   | NM_022467                                                                        | LCT       |
| 1557664_at   | 2.50  | 2.47  |                                                           | NM_014677                                                                        |           |
| 1557673_at   | 2.65  | 2.22  | leucine rich repeat<br>containing 16A                     |                                                                                  | LRRC16A   |
| 1557756_a_at | 1.94  | 1.77  | chromosome 14 open<br>reading frame 145                   | NM_031909                                                                        | C14orf145 |
| 1558371_a_at | -2.14 | -2.25 | glutamate-rich 1                                          | NM_002522                                                                        | ERICH1    |
| 1558754_at   | 2.22  | 2.36  | zinc finger protein 763                                   | NM_013230                                                                        | ZNF763    |
| 1559580_at   | 2.35  | 3.38  | leucine rich repeat<br>containing 39                      | NM_020642 ///<br>NM_030952 ///<br>NM_182901                                      | LRRC39    |
| 1559633_a_at | 1.83  | 2.65  | cholinergic receptor,<br>muscarinic 3                     | NM_006045                                                                        | CHRM3     |

|              |        |        |                                                                     |               |         |
|--------------|--------|--------|---------------------------------------------------------------------|---------------|---------|
| 1559867_at   | 2.01   | 2.13   |                                                                     | NM_001723 /// |         |
|              |        |        |                                                                     | NM_015548 /// |         |
|              |        |        |                                                                     | NM_020388 /// |         |
|              |        |        |                                                                     | NM_183380     |         |
| 1559975_at   | 2.12   | 1.84   | <i>B-cell translocation</i>                                         | NM_025113     | BTG1    |
| 1560075_at   | -5.73  | -1.79  | <i>zinc finger protein 622</i>                                      | NM_007128     | ZNF622  |
| 1560169_at   | 2.75   | 9.84   | <i>phosphatidylinositol-4-phosphate 5-kinase, type I, beta</i>      | NM_018357 /// | PIP5K1B |
|              |        |        |                                                                     | NM_197958     |         |
| 1561181_at   | 3.98   | 3.58   | <i>AT rich interactive domain 5B (MRF1-like)</i>                    | NM_001882     | ARID5B  |
| 1561292_at   | 3.85   | 1.97   |                                                                     | NM_017970 /// |         |
|              |        |        |                                                                     | NM_199043     |         |
| 1561310_at   | 2.05   | 3.21   |                                                                     | NM_013230     |         |
| 1561340_at   | -86.00 | -16.23 |                                                                     | NM_013230     |         |
| 1562386_s_at | 2.89   | 1.75   | <i>zinc finger protein 501</i>                                      | XM_166132 /// | ZNF501  |
|              |        |        |                                                                     | XM_929312 /// |         |
|              |        |        |                                                                     | XM_933582 /// |         |
|              |        |        |                                                                     | XM_933586 /// |         |
|              |        |        |                                                                     | XM_940811 /// |         |
|              |        |        |                                                                     | XM_944813 /// |         |
|              |        |        |                                                                     | XM_944815 /// |         |
|              |        |        |                                                                     | XM_944819     |         |
| 1562403_a_at | 2.17   | 2.25   | <i>solute carrier family 8 (sodium-calcium exchanger), member 3</i> | NM_005503     | SLC8A3  |
| 1562546_at   | 13.50  | 1.87   |                                                                     | NM_025113     |         |
| 1562904_s_at | -2.78  | -2.18  |                                                                     |               |         |
| 1563445_x_at | -2.66  | -3.06  | <i>cathepsin L-like 3</i>                                           | NM_014988     | CTSLL3  |
| 1563469_at   | 2.58   | 2.65   | <i>AT rich interactive domain 5B (MRF1-like)</i>                    | NM_199339     | ARID5B  |
| 1563495_at   | 1.85   | 3.03   | <i>solute carrier family 9, member 11</i>                           | NM_003667     | SLC9A11 |
| 1563646_a_at | 1.83   | 1.76   | <i>transmembrane protein</i>                                        | NM_007173     | TMEM67  |
| 1563833_at   | 3.93   | 2.34   |                                                                     | NM_001147     |         |
| 1564077_at   | 2.37   | 3.00   | <i>GPRIN family member 3</i>                                        | NM_000689     | GPRIN3  |
| 1565016_at   | 1.88   | 2.01   | <i>protein arginine methyltransferase 1</i>                         | NM_006614     | PRMT1   |
| 1565804_at   | 2.06   | 1.93   | <i>ataxin 1</i>                                                     | NM_006820     | ATXN1   |
| 1565898_at   | -11.28 | -2.05  | <i>methyltransferase 5 domain containing 1</i>                      | NM_020808     | METT5D1 |
| 1566557_at   | 1.87   | 2.12   |                                                                     | NM_001001887  |         |
| 1566852_at   | 3.02   | 11.13  | <i>tripartite motif-containing 42</i>                               | NM_015595     | TRIM42  |
| 1566966_at   | 1.90   | 1.91   | <i>dihydropyrimidine dehydrogenase</i>                              |               | DPYD    |
| 1567008_at   | -5.27  | -2.35  |                                                                     | NM_000921     |         |
| 1568646_x_at | 2.04   | 2.75   | <i>zinc finger protein 208</i>                                      | NM_002977     | ZNF208  |
| 1568807_a_at | 1.79   | 2.41   |                                                                     | NM_013431     |         |
| 1568892_at   | 2.12   | 2.00   |                                                                     | NM_173808     |         |
| 1569003_at   | 1.82   | 2.56   | <i>transmembrane protein</i>                                        | NM_018328     | TMEM49  |

|              |       |       |                                                                                  |                                                                                           |          |
|--------------|-------|-------|----------------------------------------------------------------------------------|-------------------------------------------------------------------------------------------|----------|
| 1569136_at   | 2.25  | 2.30  | mannosyl (alpha-1,3)-glycoprotein beta-1,4-N-                                    | NM_015032                                                                                 | MGAT4A   |
| 1569208_a_at | 6.92  | 2.22  | LIM and calponin homology domains 1                                              |                                                                                           | LIMCH1   |
| 1569318_at   | -6.69 | -1.93 |                                                                                  | NM_001461                                                                                 |          |
| 1569542_at   | 2.99  | 2.04  | G protein-coupled receptor 125                                                   | NM_002164                                                                                 | GPR125   |
| 1569688_at   | 2.74  | 3.37  | flavin containing monooxygenase 5                                                | NM_003118                                                                                 | FMO5     |
| 1569690_at   | 1.75  | 2.28  | coiled-coil domain containing 36                                                 | NM_014682                                                                                 | CCDC36   |
| 1569934_at   | 1.99  | 1.88  | DEP domain containing                                                            | NM_138554                                                                                 | DEPDC2   |
| 1570021_at   | 2.40  | 1.88  |                                                                                  | NM_020808                                                                                 |          |
| 1570111_at   | 1.88  | 5.83  | chromosome 14 open reading frame 48                                              | NM_001197                                                                                 | C14orf48 |
| 1570119_at   | 5.51  | 1.75  | PDS5, regulator of cohesion maintenance, homolog B (S. cerevisiae)               | NM_001001924 ///<br>NM_001001925 ///<br>NM_001001927 ///<br>NM_001001931 ///<br>NM_020749 | PDS5B    |
| 1570375_at   | 1.95  | 1.80  | protein tyrosine phosphatase, receptor                                           | XM_927616                                                                                 | PTPRN2   |
| 1570505_at   | 2.66  | 2.39  | ATP-binding cassette, sub-family B (MDR/TAP), member 4                           | NM_003107                                                                                 | ABCB4    |
| 1570621_at   | 2.05  | 2.16  | AF4/FMR2 family, member 1                                                        | NM_031282                                                                                 | AFF1     |
| 1570623_at   | 4.57  | 3.31  |                                                                                  | NM_002483                                                                                 |          |
| 200923_at    | 2.44  | 2.93  | lectin, galactoside-binding, soluble, 3                                          | NM_031282                                                                                 | LGALS3BP |
| 201034_at    | 1.91  | 2.12  | adducin 3 (gamma)                                                                | NM_005503                                                                                 | ADD3     |
| 201147_s_at  | -1.80 | -2.86 | TIMP metallopeptidase inhibitor 3 (Sorsby fundus dystrophy, pseudo-inflammatory) | NM_002228                                                                                 | TIMP3    |
| 201242_s_at  | 1.90  | 1.82  | ATPase, Na <sup>+</sup> /K <sup>+</sup> transporting, beta 1 polypeptide         |                                                                                           | ATP1B1   |
| 201324_at    | 1.84  | 6.78  | epithelial membrane                                                              | NM_004210                                                                                 | EMP1     |
| 201325_s_at  | 1.83  | 6.21  | epithelial membrane                                                              | NM_012342                                                                                 | EMP1     |
| 201416_at    | 4.89  | 3.14  | SRY (sex determining region Y)-box 4                                             |                                                                                           | SOX4     |
| 201417_at    | 2.04  | 2.87  | SRY (sex determining region Y)-box 4                                             |                                                                                           | SOX4     |
| 201418_s_at  | 2.68  | 2.61  | SRY (sex determining region Y)-box 4                                             | NM_139166                                                                                 | SOX4     |
| 201427_s_at  | 1.91  | 2.49  | selenoprotein P, plasma, 1                                                       | NM_012417 ///<br>NM_181671                                                                | SEPP1    |
| 201464_x_at  | 2.79  | 4.27  | jun oncogene                                                                     |                                                                                           | JUN      |
| 201466_s_at  | 4.60  | 3.67  | jun oncogene                                                                     | NM_000204                                                                                 | JUN      |

|             |       |       |                                                                                             |                               |         |
|-------------|-------|-------|---------------------------------------------------------------------------------------------|-------------------------------|---------|
| 201601_x_at | 2.32  | 2.82  | <i>interferon induced transmembrane protein 2 (1-8D)</i>                                    | NM_173078                     | IFITM2  |
| 201752_s_at | 1.75  | 1.80  | <i>adducin 3 (gamma)</i>                                                                    | NM_006144                     | ADD3    |
| 201753_s_at | 1.85  | 2.33  | <i>adducin 3 (gamma)</i>                                                                    | NM_021202                     | ADD3    |
| 201888_s_at | 1.80  | 2.79  | <i>interleukin 13 receptor, alpha 1</i>                                                     | NM_033502                     | IL13RA1 |
| 201939_at   | 2.44  | 2.00  | <i>polo-like kinase 2 (Drosophila)</i>                                                      | NM_000199                     | PLK2    |
| 202086_at   | 3.42  | 6.81  | <i>myxovirus (influenza virus) resistance 1, interferon-inducible</i>                       | NM_025074                     | MX1     |
| 202254_at   | 2.79  | 3.36  | <i>signal-induced proliferation-associated</i>                                              | NM_002077                     | SIPA1L1 |
| 202350_s_at | 3.35  | 4.24  | <i>matrilin 2</i>                                                                           | XM_929318 ///<br>XM_939083    | MATN2   |
| 202464_s_at | 1.78  | 1.91  | <i>6-phosphofructo-2-kinase/fructose-2,6-biphosphatase 3</i>                                | NM_017565                     | PFKFB3  |
| 202769_at   | 1.83  | 2.01  | <i>cyclin G2</i>                                                                            | NM_005771 ///<br>NM_199204    | CCNG2   |
| 202980_s_at | 2.13  | 2.39  | <i>seven in absentia homolog 1 (Drosophila)</i>                                             | NM_032199                     | SIAH1   |
| 203060_s_at | 1.79  | 1.83  | <i>3'-phosphoadenosine 5'-phosphosulfate</i>                                                | NM_001002295 ///<br>NM_002051 | PAPSS2  |
| 203065_s_at | 22.32 | 21.77 | <i>caveolin 1, caveolae protein, 22kDa</i>                                                  |                               | CAV1    |
| 203153_at   | 6.27  | 15.42 | <i>interferon-induced protein with</i>                                                      | NM_003512                     | IFIT1   |
| 203217_s_at | 1.80  | 2.07  | <i>ST3 beta-galactoside alpha-2,3-sialyltransferase 5</i>                                   | NM_000933 ///<br>NM_182797    | ST3GAL5 |
| 203232_s_at | 2.32  | 2.19  | <i>ataxin 1</i>                                                                             | NM_020469                     | ATXN1   |
| 203304_at   | 4.54  | 4.05  | <i>BMP and activin membrane-bound inhibitor homolog</i>                                     | NM_000933 ///<br>NM_182797    | BAMBI   |
| 203417_at   | 1.88  | 29.18 | <i>microfibrillar-associated protein 2</i>                                                  |                               | MFAP2   |
| 203476_at   | 2.11  | 4.83  | <i>trophoblast glycoprotein</i>                                                             | NM_032772                     | TPBG    |
| 203485_at   | 2.53  | 2.32  | <i>reticulon 1</i>                                                                          |                               | RTN1    |
| 203657_s_at | 1.77  | 1.78  | <i>cathepsin F</i>                                                                          | NM_002483                     | CTSF    |
| 203708_at   | 1.94  | 2.49  | <i>phosphodiesterase 4B, cAMP-specific (phosphodiesterase E4 dunce homolog, Drosophila)</i> | NM_001007022 ///<br>NM_020729 | PDE4B   |
| 203717_at   | -1.76 | -2.43 | <i>dipeptidyl-peptidase 4 (CD26, adenosine deaminase complexing</i>                         | NM_002126                     | DPP4    |

|             |        |       |                                                                                  |                               |          |
|-------------|--------|-------|----------------------------------------------------------------------------------|-------------------------------|----------|
| 203735_x_at | 2.16   | 1.84  | <i>PTPRF</i> interacting protein, binding protein 1 (liprin beta 1)              | NM_030756                     | PPFIBP1  |
| 203739_at   | 1.84   | 1.87  | zinc finger protein 217                                                          | NM_001039183                  | ZNF217   |
| 203757_s_at | 3.76   | 3.38  | carcinoembryonic antigen-related cell adhesion molecule 5                        | NM_001839                     | CEACAM5  |
| 203821_at   | 2.51   | 3.10  | heparin-binding EGF-like growth factor                                           |                               | HBEGF    |
| 203854_at   | 4.31   | 6.87  | complement factor I                                                              | NM_003326                     | CFI      |
| 203895_at   | 3.87   | 3.32  | phospholipase C, beta 4                                                          |                               | PLCB4    |
| 203896_s_at | 3.90   | 4.48  | phospholipase C, beta 4                                                          |                               | PLCB4    |
| 203910_at   | -36.23 | -6.36 | Rho GTPase activating protein 29                                                 | NM_004120                     | ARHGAP29 |
| 204001_at   | 1.77   | 1.87  | small nuclear RNA activating complex, polypeptide 3, 50kDa                       | NM_145290                     | SNAPC3   |
| 204018_x_at | -1.79  | -7.70 | hemoglobin, alpha 1                                                              | NM_002126                     | HBA1     |
| 204070_at   | 1.94   | 1.84  | retinoic acid receptor responder (tazarotene induced) 3                          |                               | RARRES3  |
| 204201_s_at | 1.93   | 2.03  | protein tyrosine phosphatase, non-receptor type 13 (APO-1/CD95 (Fas)-associated) |                               | PTPN13   |
| 204205_at   | 2.58   | 2.63  | apolipoprotein B mRNA editing enzyme, catalytic polypeptide-like                 | NM_203459                     | APOBEC3G |
| 204217_s_at | 2.05   | 2.76  | reticulum 2                                                                      | NM_006343                     | RTN2     |
| 204221_x_at | 3.21   | 3.53  | GLI pathogenesis-related 1 (glioma)                                              |                               | GLIPR1   |
| 204271_s_at | 1.91   | 2.95  | endothelin receptor type                                                         | NM_003866                     | EDNRB    |
| 204304_s_at | 1.99   | 2.05  | prominin 1                                                                       | NM_002462                     | PROM1    |
| 204415_at   | 2.82   | 3.14  | interferon, alpha-inducible protein 6                                            | NM_001002264 ///<br>NM_033255 | IFI6     |
| 204419_x_at | -2.31  | -6.00 | hemoglobin, gamma A                                                              | NM_013230                     | HBG1     |
| 204439_at   | 6.40   | 11.88 | interferon-induced protein 44-like                                               | NM_015976 ///<br>NM_152238    | IFI44L   |
| 204455_at   | 9.31   | 8.24  | dystonin                                                                         | NM_002380 ///<br>NM_030583    | DST      |
| 204567_s_at | 2.12   | 1.88  | ATP-binding cassette, sub-family G (WHITE),                                      |                               | ABCG1    |
| 204591_at   | 6.40   | 21.57 | cell adhesion molecule with homology to L1CAM (close homolog                     | NM_002718 ///<br>NM_181897    | CHL1     |
| 204633_s_at | 1.84   | 2.03  | ribosomal protein S6 kinase, 90kDa, polypeptide 5                                |                               | RPS6KA5  |

|             |       |       |                                                              |                                                                                                               |           |
|-------------|-------|-------|--------------------------------------------------------------|---------------------------------------------------------------------------------------------------------------|-----------|
| 204635_at   | 1.84  | 2.35  | ribosomal protein S6<br>kinase, 90kDa,<br>polypeptide 5      | NM_032738                                                                                                     | RPS6KA5   |
| 204684_at   | 9.92  | 2.33  | neuronal pentraxin I                                         | NM_006851                                                                                                     | NPTX1     |
| 204747_at   | 2.96  | 2.44  | interferon-induced<br>protein with                           | NM_000499                                                                                                     | IFIT3     |
| 204753_s_at | 3.72  | 3.76  | hepatic leukemia factor                                      | NM_001033569 ///<br>NM_001033570 ///<br>NM_001033571 ///<br>NM_001033572 ///<br>NM_001033574 ///<br>NM_016627 | HLF       |
| 204754_at   | 21.30 | 4.48  | hepatic leukemia factor                                      | NM_025244 ///<br>NM_182911                                                                                    | HLF       |
| 204755_x_at | 3.51  | 3.61  | hepatic leukemia factor                                      |                                                                                                               | HLF       |
| 204848_x_at | -1.98 | -5.38 | hemoglobin, gamma A                                          | NM_000933 ///<br>NM_182797                                                                                    | HBG1      |
| 204889_s_at | 4.57  | 3.17  | neuralized homolog<br>(Drosophila)                           | NM_032199                                                                                                     | NEURL     |
| 204932_at   | 13.06 | 1.85  | tumor necrosis factor<br>receptor superfamily,<br>member 11b | NM_153046                                                                                                     | TNFRSF11B |

|             |        |       |                                                                               |                                                                                                                                                                                                                                                                                                                                                                                                                                                                                                                                                              |         |
|-------------|--------|-------|-------------------------------------------------------------------------------|--------------------------------------------------------------------------------------------------------------------------------------------------------------------------------------------------------------------------------------------------------------------------------------------------------------------------------------------------------------------------------------------------------------------------------------------------------------------------------------------------------------------------------------------------------------|---------|
| 204967_at   | 29.64  | 2.30  | shroom family member<br>2                                                     | XM_496237 ///<br>XM_930513 ///<br>XM_935185 ///<br>XM_935186 ///<br>XM_935187 ///<br>XM_935188 ///<br>XM_935189 ///<br>XM_935190 ///<br>XM_935191 ///<br>XM_935192 ///<br>XM_935193 ///<br>XM_935194 ///<br>XM_935195 ///<br>XM_935196 ///<br>XM_935197 ///<br>XM_935198 ///<br>XM_935200 ///<br>XM_935201 ///<br>XM_940040 ///<br>XM_942463 ///<br>XM_945997 ///<br>XM_945998 ///<br>XM_945999 ///<br>XM_946000 ///<br>XM_946001 ///<br>XM_946002 ///<br>XM_946003 ///<br>XM_946004 ///<br>XM_946005 ///<br>XM_946007 ///<br>XM_946008 ///<br>XM_946009 /// | SHROOM2 |
| 204972_at   | 2.45   | 3.34  | 2'-5'-oligoadenylate<br>synthetase 2, 69/71kDa                                | NM_000856                                                                                                                                                                                                                                                                                                                                                                                                                                                                                                                                                    | OAS2    |
| 205016_at   | -2.08  | -1.98 | transforming growth<br>factor, alpha                                          | NM_005814                                                                                                                                                                                                                                                                                                                                                                                                                                                                                                                                                    | TGFA    |
| 205159_at   | -2.08  | -2.72 | colony stimulating factor<br>2 receptor, beta, low-<br>affinity (granulocyte- | NM_174926                                                                                                                                                                                                                                                                                                                                                                                                                                                                                                                                                    | CSF2RB  |
| 205376_at   | 3.44   | 3.83  | inositol polyphosphate-4-<br>phosphatase, type II,<br>105kDa                  | NM_019012                                                                                                                                                                                                                                                                                                                                                                                                                                                                                                                                                    | INPP4B  |
| 205381_at   | 18.11  | 5.87  | leucine rich repeat<br>containing 17                                          | NM_152616                                                                                                                                                                                                                                                                                                                                                                                                                                                                                                                                                    | LRRC17  |
| 205383_s_at | 2.00   | 1.94  | zinc finger and BTB<br>domain containing 20                                   | NM_005771 ///<br>NM_199204                                                                                                                                                                                                                                                                                                                                                                                                                                                                                                                                   | ZBTB20  |
| 205390_s_at | -14.26 | -2.17 | ankyrin 1, erythrocytic                                                       | NM_000903 ///<br>NM_001025433 ///<br>NM_001025434                                                                                                                                                                                                                                                                                                                                                                                                                                                                                                            | ANK1    |



|             |       |       |                                                                                        |                                                                               |          |
|-------------|-------|-------|----------------------------------------------------------------------------------------|-------------------------------------------------------------------------------|----------|
| 205466_s_at | 1.88  | 1.98  | heparan sulfate<br>(glucosamine) 3-O-<br>sulfotransferase 1                            | NM_005771 ///<br>NM_199204                                                    | HS3ST1   |
| 205483_s_at | 1.87  | 2.36  | ISG15 ubiquitin-like<br>modifier                                                       |                                                                               | ISG15    |
| 205488_at   | 4.23  | 3.97  | granzyme A (granzyme<br>1, cytotoxic T-<br>lymphocyte-associated<br>serine esterase 3) | NM_004318 ///<br>NM_020164 ///<br>NM_032466 ///<br>NM_032467 ///<br>NM_032468 | GZMA     |
| 205513_at   | 1.74  | 2.11  | transcobalamin I<br>(vitamin B12 binding<br>protein, R binder family)                  | NM_145290                                                                     | TCN1     |
| 205552_s_at | 16.89 | 26.56 | 2',5'-oligoadenylate<br>synthetase 1, 40/46kDa                                         | NM_018165 ///<br>NM_018313 ///<br>NM_181042                                   | OAS1     |
| 205572_at   | 6.69  | 21.32 | angiopoietin 2                                                                         | NM_001031683 ///<br>NM_001549                                                 | ANGPT2   |
| 205573_s_at | 3.36  | 3.87  | sorting nexin 7                                                                        | NM_052931                                                                     | SNX7     |
| 205609_at   | 2.47  | 1.79  | angiopoietin 1                                                                         | NM_003196                                                                     | ANGPT1   |
| 205624_at   | -2.92 | -2.22 | carboxypeptidase A3<br>(mast cell)                                                     | NM_015013                                                                     | CPA3     |
| 205626_s_at | 2.68  | 3.04  | calbindin 1, 28kDa                                                                     | NM_032495 ///<br>NM_139211 ///<br>NM_139212                                   | CALB1    |
| 205653_at   | 2.13  | 1.94  | cathepsin G                                                                            | NM_145044                                                                     | CTSG     |
| 205694_at   | 30.54 | 21.46 | tyrosinase-related                                                                     | NM_003107                                                                     | TYRP1    |
| 205749_at   | 3.19  | 5.52  | cytochrome P450,<br>family 1, subfamily A,<br>polypeptide 1                            | NM_001547                                                                     | CYP1A1   |
| 205780_at   | 5.12  | 12.58 | BCL2-interacting killer<br>(apoptosis-inducing)                                        | XM_376281 ///<br>XM_941354                                                    | BIK      |
| 205882_x_at | 1.81  | 1.93  | adducin 3 (gamma)                                                                      | NM_032199                                                                     | ADD3     |
| 205929_at   | 3.07  | 4.66  | glycoprotein A33<br>(transmembrane)                                                    | NM_001001132 ///<br>NM_003024                                                 | GPA33    |
| 205967_at   | -1.77 | -1.82 | histone cluster 1, H4c                                                                 | NM_152588                                                                     | HIST1H4C |
| 205984_at   | 8.66  | 3.63  | corticotropin releasing<br>hormone binding protein                                     | NM_017644                                                                     | CRHBP    |
| 205991_s_at | -2.36 | -2.84 | paired related                                                                         | NM_024614                                                                     | PRRX1    |
| 206009_at   | 2.31  | 3.93  | integrin, alpha 9                                                                      | NM_002038 ///<br>NM_022872 ///<br>NM_022873                                   | ITGA9    |
| 206135_at   | 5.23  | 33.43 | suppression of<br>tumorigenicity 18<br>(breast carcinoma) (zinc)                       | NM_002228                                                                     | ST18     |
| 206207_at   | -2.20 | -1.90 | Charcot-Leyden crystal<br>protein                                                      | NM_015556                                                                     | CLC      |
| 206310_at   | 2.45  | 2.24  | serine peptidase<br>inhibitor, Kazal type 2<br>(acrosin-trypsin                        | NM_030756                                                                     | SPINK2   |

|             |       |        |                                                                                          |                                                              |               |
|-------------|-------|--------|------------------------------------------------------------------------------------------|--------------------------------------------------------------|---------------|
| 206318_at   | 2.76  | 3.46   | serine peptidase inhibitor-like, with Kunitz and WAP domains 1                           | NM_020398 ///<br>NM_181502                                   | SPINLW1       |
| 206366_x_at | 79.77 | 25.07  | chemokine (C motif) ligand 2                                                             | NM_001040214                                                 | XCL2          |
| 206385_s_at | 2.52  | 3.52   | ankyrin 3, node of Ranvier (ankyrin G)                                                   | NM_001031687 ///<br>NM_003558                                | ANK3          |
| 206390_x_at | -2.14 | -4.00  | platelet factor 4 (chemokine (C-X-C motif) ligand 4)                                     | NM_001461                                                    | PF4           |
| 206548_at   | 3.01  | 2.09   |                                                                                          | NM_031435                                                    |               |
| 206579_at   | 1.78  | 1.90   | zinc finger protein 192                                                                  |                                                              | ZNF192        |
| 206618_at   | -2.66 | -1.96  | interleukin 18 receptor 1                                                                | NM_032427                                                    | IL18R1        |
| 206647_at   | -1.99 | -12.99 | hemoglobin, zeta                                                                         | NM_013313                                                    | HBZ           |
| 206707_x_at | 1.79  | 1.79   | chromosome 6 open reading frame 32                                                       | NM_000452                                                    | C6orf32       |
| 206828_at   | 2.45  | 1.78   | TXK tyrosine kinase                                                                      | NM_001001132 ///<br>NM_003024                                | TXK           |
| 206834_at   | -2.03 | -3.79  | hemoglobin, delta                                                                        | NM_014600                                                    | HBD           |
| 206932_at   | -2.28 | -2.24  | cholesterol 25-hydroxylase                                                               | NM_002838 ///<br>NM_080921 ///<br>NM_080922 ///<br>NM_080923 | CH25H         |
| 206950_at   | 5.96  | 5.89   | sodium channel, voltage-gated, type IX, alpha subunit                                    | NM_182758                                                    | SCN9A         |
| 207067_s_at | -2.56 | -2.52  | histidine decarboxylase                                                                  |                                                              | HDC           |
| 207095_at   | 2.72  | 2.89   | solute carrier family 10 (sodium/bile acid cotransporter family), member 2               | NM_003107                                                    | SLC10A2       |
| 207111_at   | 2.23  | 3.79   | egf-like module containing, mucin-like, hormone receptor-like 1                          | NM_004929                                                    | EMR1          |
| 207161_at   | 21.87 | 13.11  | KIAA0087                                                                                 | NM_001198 ///<br>NM_182907                                   | KIAA0087      |
| 207284_s_at | 3.00  | 3.31   | aspartate beta-phosphodiesterase 1C, calmodulin-dependent 70kDa                          | NM_000076                                                    | ASPH<br>PDE1C |
| 207303_at   | -3.75 | -3.66  |                                                                                          |                                                              |               |
| 207408_at   | 1.83  | 2.02   | solute carrier family 22, member 14                                                      | NM_000443 ///<br>NM_018849 ///<br>NM_018850                  | SLC22A14      |
| 207426_s_at | 3.59  | 3.25   | tumor necrosis factor (ligand) superfamily, member 4 (tax-transcriptionally              | NM_013313                                                    | TNFSF4        |
| 207496_at   | 2.61  | 1.84   | membrane-spanning 4-domains, subfamily A, member 2 (Fc fragment of IgE, high affinity I, | NM_017640                                                    | MS4A2         |

|             |       |       |                                                                        |                                                                                                |        |
|-------------|-------|-------|------------------------------------------------------------------------|------------------------------------------------------------------------------------------------|--------|
| 207764_s_at | 2.10  | 1.77  | homeodomain interacting protein                                        | NM_006417                                                                                      | HIPK3  |
| 207777_s_at | 1.77  | 4.11  | SP140 nuclear body protein                                             | NM_001012755                                                                                   | SP140  |
| 207793_s_at | 2.48  | 1.77  | erythrocyte membrane protein band 4.1 (elliptocytosis 1, RH-linked)    | NM_007118                                                                                      | EPB41  |
| 207857_at   | 2.01  | 3.44  | leukocyte immunoglobulin-like receptor, subfamily B (with TM and ITIM) | NM_000139                                                                                      | LILRB1 |
| 208436_s_at | 2.37  | 2.35  | interferon regulatory factor 7                                         | XM_043739 ///<br>XM_935434 ///<br>XM_935435 ///<br>XM_942428 ///<br>XM_945966 ///<br>XM_945967 | IRF7   |
| 208488_s_at | -2.06 | -1.83 | complement component (3b/4b) receptor 1 (Knops blood group)            |                                                                                                | CR1    |
| 208498_s_at | 1.93  | 1.77  | amylase, alpha 1A (salivary)                                           |                                                                                                | AMY1A  |
| 208544_at   | 2.37  | 1.96  | adrenergic, alpha-2B-, receptor                                        | NM_005294                                                                                      | ADRA2B |
| 208650_s_at | 13.42 | 10.66 |                                                                        | NM_032199                                                                                      |        |
| 208651_x_at | 11.40 | 13.81 | CD24 molecule                                                          | NM_021822                                                                                      | CD24   |
| 208782_at   | 1.79  | 2.34  | folistatin-like 1                                                      | NM_138468 ///<br>NM_178231                                                                     | FSTL1  |
| 208891_at   | 2.50  | 2.50  | dual specificity phosphatase 6                                         | NM_000856                                                                                      | DUSP6  |
| 208892_s_at | 2.50  | 2.18  | dual specificity phosphatase 6                                         | NM_006866                                                                                      | DUSP6  |
| 209010_s_at | 2.62  | 10.58 | triple functional domain                                               |                                                                                                | TRIO   |
| 209047_at   | -1.82 | -2.19 | aquaporin 1 (Colton blood group)                                       |                                                                                                | AQP1   |
| 209116_x_at | -2.54 | -5.24 | hemoglobin, beta                                                       |                                                                                                | HBB    |
| 209118_s_at | 2.31  | 2.55  | tubulin, alpha 1a                                                      | NM_032199                                                                                      | TUBA1A |
| 209147_s_at | -2.38 | -2.47 | phosphatidic acid phosphatase type 2A                                  | NM_021136 ///<br>NM_206852 ///<br>NM_206857                                                    | PPAP2A |
| 209160_at   | 2.08  | 2.14  | aldo-keto reductase family 1, member C3 (3-)                           | NM_001149 ///<br>NM_020987                                                                     | AKR1C3 |
| 209298_s_at | 2.85  | 3.12  | intersectin 1 (SH3 domain protein)                                     | NM_015493                                                                                      | ITSN1  |
| 209348_s_at | 1.92  | 2.28  | v-maf musculoaponeurotic fibrosarcoma oncogene                         | NM_001945                                                                                      | MAF    |
| 209356_x_at | 2.38  | 2.08  | EGF-containing fibulin-like extracellular matrix protein 2             | NM_000076                                                                                      | EFEMP2 |

|             |       |       |                                                                                      |                                                                                                                                                   |         |
|-------------|-------|-------|--------------------------------------------------------------------------------------|---------------------------------------------------------------------------------------------------------------------------------------------------|---------|
| 209458_x_at | -2.12 | -7.47 | hemoglobin, alpha 1                                                                  | NM_002077                                                                                                                                         | HBA1    |
| 209459_s_at | 2.44  | 5.45  | 4-aminobutyrate<br>aminotransferase                                                  | NM_017691                                                                                                                                         | ABAT    |
| 209514_s_at | 1.79  | 2.16  | RAB27A, member RAS<br>oncogene family                                                |                                                                                                                                                   | RAB27A  |
| 209515_s_at | 1.82  | 2.21  | RAB27A, member RAS<br>oncogene family                                                | NM_001946 ///<br>NM_022652                                                                                                                        | RAB27A  |
| 209555_s_at | -1.76 | -2.19 | CD36 molecule<br>(thrombospondin                                                     | NM_001946 ///<br>NM_022652                                                                                                                        | CD36    |
| 209604_s_at | 3.95  | 8.15  | GATA binding protein 3                                                               | NM_033514 ///<br>XM_290985 ///<br>XM_496582 ///<br>XM_934628 ///<br>XM_934629 ///<br>XM_934630 ///<br>XM_934631 ///<br>XM_934633 ///<br>XM_934634 | GATA3   |
| 209632_at   | 3.32  | 2.84  | protein phosphatase 2<br>(formerly 2A), regulatory<br>subunit B", alpha              | NM_004437 ///<br>NM_203342 ///<br>NM_203343                                                                                                       | PPP2R3A |
| 209771_x_at | 7.84  | 10.63 | CD24 molecule                                                                        | NM_152665                                                                                                                                         | CD24    |
| 209772_s_at | 3.37  | 7.00  | CD24 molecule                                                                        | NM_006045                                                                                                                                         | CD24    |
| 209829_at   | 1.97  | 1.95  | chromosome 6 open<br>reading frame 32                                                | NM_018165 ///<br>NM_018313 ///<br>NM_181042                                                                                                       | C6orf32 |
| 209870_s_at | 4.68  | 4.66  | amyloid beta (A4)<br>precursor protein-<br>binding, family A,<br>member 2 (X11-like) | NM_001146                                                                                                                                         | APBA2   |
| 209871_s_at | 7.34  | 16.34 | amyloid beta (A4)<br>precursor protein-<br>binding, family A,<br>member 2 (X11-like) | NM_002242                                                                                                                                         | APBA2   |
| 209994_s_at | 1.76  | 1.98  | ATP-binding cassette,<br>sub-family B<br>(MDR/TAP), member 1                         |                                                                                                                                                   | ABCB1   |
| 210029_at   | 5.36  | 2.32  | indoleamine-pyrrole 2,3<br>dioxygenase                                               | NM_080672 ///<br>NM_183244 ///<br>NM_183246                                                                                                       | INDO    |
| 210036_s_at | -1.89 | -2.41 | potassium voltage-<br>gated channel,<br>subfamily H (eag-                            | NM_024989                                                                                                                                         | KCNH2   |
| 210179_at   | 2.47  | 5.94  | potassium inwardly-<br>rectifying channel,<br>subfamily J, member 13                 | NM_022824                                                                                                                                         | KCNJ13  |
| 210279_at   | 2.04  | 2.54  | G protein-coupled<br>receptor 18                                                     | NM_017523 ///<br>NM_199139                                                                                                                        | GPR18   |
| 210414_at   | 2.24  | 10.26 | fibronectin leucine rich<br>transmembrane protein                                    | NM_003328                                                                                                                                         | FLRT1   |

|             |       |       |                                                                                           |                                                                                                |          |
|-------------|-------|-------|-------------------------------------------------------------------------------------------|------------------------------------------------------------------------------------------------|----------|
| 210504_at   | -1.87 | -2.72 | Kruppel-like factor 1<br>(erythroid)                                                      | NM_001032731 ///<br>NM_002535 ///<br>NM_016817                                                 | KLF1     |
| 210517_s_at | -2.50 | -1.96 | A kinase (PRKA) anchor<br>protein (gravin) 12                                             | NM_021114                                                                                      | AKAP12   |
| 210803_at   | 2.15  | 4.02  | thioredoxin reductase 2                                                                   | NM_000663 ///<br>NM_020686                                                                     | TXNRD2   |
| 210946_at   | -2.69 | -1.98 | phosphatidic acid<br>phosphatase type 2A                                                  | NM_005567                                                                                      | PPAP2A   |
| 210951_x_at | 2.15  | 2.40  | RAB27A, member RAS<br>oncogene family                                                     | NM_006622                                                                                      | RAB27A   |
| 210954_s_at | -2.41 | -7.08 | TSC22 domain family,<br>member 2                                                          | NM_014602                                                                                      | TSC22D2  |
| 211066_x_at | 1.80  | 2.10  | protocadherin gamma<br>subfamily A, 12                                                    | NM_173690                                                                                      | PCDHGA12 |
| 211100_x_at | 1.79  | 2.95  | leukocyte<br>immunoglobulin-like<br>receptor, subfamily B<br>(with TM and ITIM            | NM_002207                                                                                      | LILRB1   |
| 211102_s_at | 2.57  | 3.43  | leukocyte<br>immunoglobulin-like<br>receptor, subfamily B<br>(with TM and ITIM            |                                                                                                | LILRB1   |
| 211298_s_at | -1.98 | -4.95 | albumin                                                                                   | NM_020397 ///<br>NM_153498                                                                     | ALB      |
| 211597_s_at | 2.90  | 3.00  | HOP homeobox                                                                              | NM_015263                                                                                      | HOPX     |
| 211657_at   | 4.73  | 4.21  | carcinoembryonic<br>antigen-related cell<br>adhesion molecule 5                           | NM_016938                                                                                      | CEACAM5  |
| 211696_x_at | -2.44 | -4.16 | hemoglobin, beta                                                                          | NM_003369                                                                                      | HBB      |
| 211699_x_at | -2.09 | -6.70 | hemoglobin, alpha 1                                                                       | XM_379398 ///<br>XM_932815 ///<br>XM_932820 ///<br>XM_944201 ///<br>XM_944203 ///<br>XM_944207 | HBA1     |
| 211745_x_at | -2.30 | -7.51 | hemoglobin, alpha 1                                                                       | NM_198281                                                                                      | HBA1     |
| 211883_x_at | 1.98  | 2.05  | carcinoembryonic<br>antigen-related cell<br>adhesion molecule 1<br>(biliary glycoprotein) | NM_016205                                                                                      | CEACAM1  |
| 212062_at   | 9.43  | 11.83 | ATPase, class II, type                                                                    | NM_138819                                                                                      | ATP9A    |
| 212096_s_at | 5.05  | 3.79  | mitochondrial tumor<br>suppressor 1                                                       | NM_000682                                                                                      | MTUS1    |
| 212097_at   | 99.14 | 31.15 | caveolin 1, caveolae<br>protein, 22kDa                                                    |                                                                                                | CAV1     |
| 212224_at   | 6.56  | 8.09  | aldehyde<br>dehydrogenase 1<br>family, member A1                                          | NM_001572 ///<br>NM_004029 ///<br>NM_004031                                                    | ALDH1A1  |
| 212614_at   | 2.87  | 3.09  | AT rich interactive<br>domain 5B (MRF1-like)                                              |                                                                                                | ARID5B   |

|             |       |       |                                                           |                                                                                                                                                                                                                                                                                                                                                                                                                                                                                                                                                                 |           |
|-------------|-------|-------|-----------------------------------------------------------|-----------------------------------------------------------------------------------------------------------------------------------------------------------------------------------------------------------------------------------------------------------------------------------------------------------------------------------------------------------------------------------------------------------------------------------------------------------------------------------------------------------------------------------------------------------------|-----------|
| 212667_at   | 5.24  | 1.90  | secreted protein, acidic, cysteine-rich                   |                                                                                                                                                                                                                                                                                                                                                                                                                                                                                                                                                                 | SPARC     |
| 212761_at   | 1.99  | 2.64  | transcription factor 7-like 2 (T-cell specific,           | NM_007249 ///<br>NM_016285                                                                                                                                                                                                                                                                                                                                                                                                                                                                                                                                      | TCF7L2    |
| 212765_at   | 3.46  | 3.18  | calmodulin regulated spectrin-associated protein 1-like 1 | NM_144620                                                                                                                                                                                                                                                                                                                                                                                                                                                                                                                                                       | CAMSAP1L1 |
| 212820_at   | 2.38  | 3.49  | Dmx-like 2                                                | NM_000856                                                                                                                                                                                                                                                                                                                                                                                                                                                                                                                                                       | DMXL2     |
| 213032_at   | -3.35 | -2.00 | nuclear factor I/B                                        | NM_152475                                                                                                                                                                                                                                                                                                                                                                                                                                                                                                                                                       | NFIB      |
| 213058_at   | 2.05  | 1.90  | tetratricopeptide repeat domain 28                        | NM_001001132 ///<br>NM_003024                                                                                                                                                                                                                                                                                                                                                                                                                                                                                                                                   | TTC28     |
| 213082_s_at | 1.88  | 2.40  | solute carrier family 35, member D2                       | NM_001037501 ///<br>XM_496391 ///<br>XM_929808 ///<br>XM_933968 ///<br>XM_933971 ///<br>XM_933974 ///<br>XM_933975 ///<br>XM_933976 ///<br>XM_933977 ///<br>XM_933978 ///<br>XM_933980 ///<br>XM_933982 ///<br>XM_933984 ///<br>XM_933989 ///<br>XM_933993 ///<br>XM_933996 ///<br>XM_934000 ///<br>XM_934003 ///<br>XM_934004 ///<br>XM_934007 ///<br>XM_934010 ///<br>XM_934014 ///<br>XM_934016 ///<br>XM_934017 ///<br>XM_934019 ///<br>XM_934021 ///<br>XM_934022 ///<br>XM_934023 ///<br>XM_934025 ///<br>XM_934026 ///<br>XM_934028 ///<br>XM_934029 /// | SLC35D2   |
| 213094_at   | 1.95  | 2.09  | G protein-coupled receptor 126                            | NM_003107                                                                                                                                                                                                                                                                                                                                                                                                                                                                                                                                                       | GPR126    |
| 213135_at   | 1.76  | 2.58  | T-cell lymphoma invasion and metastasis                   | NM_000332                                                                                                                                                                                                                                                                                                                                                                                                                                                                                                                                                       | TIAM1     |
| 213156_at   | 1.80  | 1.95  |                                                           | NM_003641                                                                                                                                                                                                                                                                                                                                                                                                                                                                                                                                                       |           |
| 213158_at   | 2.16  | 2.11  |                                                           | NM_006009                                                                                                                                                                                                                                                                                                                                                                                                                                                                                                                                                       |           |
| 213174_at   | -2.12 | -4.76 | tetratricopeptide repeat domain 9                         | NM_002207                                                                                                                                                                                                                                                                                                                                                                                                                                                                                                                                                       | TTC9      |

|             |       |       |                                                                    |                                                                                                                                                                                                                                                                                           |          |
|-------------|-------|-------|--------------------------------------------------------------------|-------------------------------------------------------------------------------------------------------------------------------------------------------------------------------------------------------------------------------------------------------------------------------------------|----------|
| 213283_s_at | -1.74 | -1.85 | <i>sal-like 2 (Drosophila)</i>                                     | XM_496826 ///<br>XM_933674 ///<br>XM_933675 ///<br>XM_933677 ///<br>XM_941807 ///<br>XM_945447 ///<br>XM_945448 ///<br>XM_945450                                                                                                                                                          | SALL2    |
| 213316_at   | 7.54  | 9.04  | <i>KIAA1462</i>                                                    | NM_001037339 ///<br>NM_001037340 ///<br>NM_001037341 ///<br>NM_002600                                                                                                                                                                                                                     | KIAA1462 |
| 213348_at   | 2.51  | 2.46  | <i>cyclin-dependent kinase inhibitor 1C (p57, Kip2)</i>            | NM_020654                                                                                                                                                                                                                                                                                 | CDKN1C   |
| 213479_at   | 34.38 | 10.36 | <i>neuronal pentraxin II</i>                                       | NM_001024948 ///<br>NM_017737                                                                                                                                                                                                                                                             | NPTX2    |
| 213515_x_at | -2.35 | -4.72 | <i>hemoglobin, gamma A</i>                                         | NM_080657                                                                                                                                                                                                                                                                                 | HBG1     |
| 213541_s_at | 1.82  | 1.90  | <i>v-ets erythroblastosis virus E26 oncogene homolog (avian)</i>   | NM_144574 ///<br>NM_181291 ///<br>NM_181302 ///<br>NM_181308                                                                                                                                                                                                                              | ERG      |
| 213665_at   | 2.89  | 2.65  | <i>SRY (sex determining region Y)-box 4</i>                        | XM_371082 ///<br>XM_930250 ///<br>XM_934509 ///<br>XM_934511 ///<br>XM_934512 ///<br>XM_934513 ///<br>XM_934515 ///<br>XM_934518 ///<br>XM_934521 ///<br>XM_934522 ///<br>XM_942690 ///<br>XM_946231 ///<br>XM_946232 ///<br>XM_946233 ///<br>XM_946234 ///<br>XM_946235 ///<br>XM_946236 | SOX4     |
| 213668_s_at | 2.33  | 2.92  | <i>SRY (sex determining region Y)-box 4</i>                        | NM_058172                                                                                                                                                                                                                                                                                 | SOX4     |
| 213689_x_at | 1.81  | 2.45  | <i>ribosomal protein L5</i>                                        | NM_005619 ///<br>NM_206900 ///<br>NM_206901 ///<br>NM_206902                                                                                                                                                                                                                              | RPL5     |
| 213880_at   | 6.88  | 5.13  | <i>leucine-rich repeat-containing G protein-coupled receptor 5</i> | NM_018423                                                                                                                                                                                                                                                                                 | LGR5     |
| 213963_s_at | -3.27 | -2.58 | <i>Sin3A-associated protein, 30kDa</i>                             |                                                                                                                                                                                                                                                                                           | SAP30    |
| 213996_at   | 2.66  | 2.45  | <i>yippee-like 1</i>                                               |                                                                                                                                                                                                                                                                                           | YPEL1    |

|             |        |       |                                                                                             |                                                                               |           |
|-------------|--------|-------|---------------------------------------------------------------------------------------------|-------------------------------------------------------------------------------|-----------|
| 214084_x_at | 1.95   | 2.72  |                                                                                             | NM_012214                                                                     |           |
| 214146_s_at | -1.87  | -2.09 | <i>pro-platelet basic protein (chemokine (C-X-C motif) ligand 7)</i>                        | NM_018371                                                                     | PPBP      |
| 214366_s_at | -2.19  | -2.33 | <i>arachidonate 5-lipoxygenase</i>                                                          | NM_013280                                                                     | ALOX5     |
| 214414_x_at | -2.73  | -9.13 | <i>hemoglobin, alpha 2</i>                                                                  | NM_213602                                                                     | HBA2      |
| 214453_s_at | 2.65   | 2.07  | <i>interferon-induced protein 44</i>                                                        | NM_032584                                                                     | IFI44     |
| 214567_s_at | 125.15 | 29.40 | <i>chemokine (C motif) ligand 1</i>                                                         | NM_001974                                                                     | XCL1      |
| 214596_at   | 4.52   | 5.35  |                                                                                             | NM_001012753                                                                  |           |
| 214627_at   | -5.05  | -2.53 | <i>eosinophil peroxidase</i>                                                                | NM_004285                                                                     | EPX       |
| 214997_at   | 4.06   | 1.84  | <i>golgi autoantigen, golgin subfamily a, 1</i>                                             | NM_005902                                                                     | GOLGA1    |
| 215017_s_at | 2.29   | 1.99  | <i>formin binding protein 1-like</i>                                                        | NM_152544                                                                     | FNBP1L    |
| 215071_s_at | 3.92   | 4.75  | <i>histone cluster 1, H2ac</i>                                                              | NM_152588                                                                     | HIST1H2AC |
| 215124_at   | -15.32 | -2.15 | <i>zinc finger protein 550</i>                                                              | NM_020428                                                                     | ZNF550    |
| 215146_s_at | 4.05   | 1.96  | <i>tetratricopeptide repeat domain 28</i>                                                   | NM_173690                                                                     | TTC28     |
| 215288_at   | 1.77   | 3.15  | <i>transient receptor potential cation channel, subfamily C, member 2 (pseudogene)</i>      | XM_927459 ///<br>XM_935508 ///<br>XM_938444                                   | TRPC2     |
| 215300_s_at | 5.42   | 3.36  | <i>flavin containing monooxygenase 5</i>                                                    |                                                                               | FMO5      |
| 215368_at   | 1.92   | 2.06  | <i>nebulin</i>                                                                              | NM_001032278 ///<br>NM_024302                                                 | NEB       |
| 215478_at   | 10.77  | 1.90  | <i>regulating synaptic membrane exocytosis 2</i>                                            | NM_015116                                                                     | RIMS2     |
| 215585_at   | -2.40  | -1.89 | <i>KIAA0174</i>                                                                             | NM_005230                                                                     | KIAA0174  |
| 215671_at   | 13.58  | 7.95  | <i>phosphodiesterase 4B, cAMP-specific (phosphodiesterase E4 dunce homolog, Drosophila)</i> | NM_032679                                                                     | PDE4B     |
| 215761_at   | 1.90   | 2.25  | <i>Dmx-like 2</i>                                                                           |                                                                               | DMXL2     |
| 215791_at   | 2.71   | 4.10  | <i>intersectin 1 (SH3 domain protein)</i>                                                   |                                                                               | ITSN1     |
| 215856_at   | 2.24   | 1.82  | <i>sialic acid binding Ig-like lectin 15</i>                                                |                                                                               | SIGLEC15  |
| 216129_at   | 2.48   | 2.63  | <i>ATPase, class II, type 9A</i>                                                            | NM_033262 ///<br>NM_058240 ///<br>NM_182932 ///<br>NM_182936 ///<br>NM_183002 | ATP9A     |
| 216317_x_at | -2.70  | -4.78 | <i>Rh blood group, CcEe antigens</i>                                                        | NM_003622 ///<br>NM_177444                                                    | RHCE      |
| 216379_x_at | 8.38   | 9.90  | <i>CD24 molecule</i>                                                                        |                                                                               | CD24      |
| 216511_s_at | 3.72   | 1.82  | <i>transcription factor 7-like 2 (T-cell specific,</i>                                      | NM_006440                                                                     | TCF7L2    |



|             |       |       |                                                                                                                |                                                                                                                 |           |
|-------------|-------|-------|----------------------------------------------------------------------------------------------------------------|-----------------------------------------------------------------------------------------------------------------|-----------|
| 216628_at   | 3.30  | 3.52  |                                                                                                                | NM_004580 ///<br>NM_183234 ///<br>NM_183235 ///<br>NM_183236                                                    |           |
| 216716_at   | 3.89  | 3.54  | ABO blood group<br>(transferase A, alpha 1-<br>3-N-<br>acetylgalactosaminyltra<br>nsferase; transferase B,     | NM_005465 ///<br>NM_181690                                                                                      | ABO       |
| 216749_at   | 4.11  | 5.79  | transcriptional<br>regulating factor 1                                                                         | NM_002037 ///<br>NM_153047 ///<br>NM_153048                                                                     | TRERF1    |
| 216752_at   | 2.43  | 5.30  | phosphoinositide-3-<br>kinase, regulatory<br>subunit 4                                                         | NM_032379 ///<br>NM_032943 ///<br>NM_206927 ///<br>NM_206928 ///<br>NM_206929 ///<br>NM_206930                  | PIK3R4    |
| 216850_at   | 1.94  | 2.99  | small nuclear<br>ribonucleoprotein<br>polypeptide N                                                            | NM_001006610 ///<br>NM_003031                                                                                   | SNRPN     |
| 216894_x_at | 2.66  | 1.78  | cyclin-dependent kinase<br>inhibitor 1C (p57, Kip2)                                                            | NM_021197                                                                                                       | CDKN1C    |
| 217125_at   | 1.86  | 2.72  |                                                                                                                | NM_001911                                                                                                       |           |
| 217143_s_at | -2.07 | -2.13 | T cell receptor alpha                                                                                          |                                                                                                                 | TRA@      |
| 217196_s_at | 2.11  | 2.17  | calmodulin regulated<br>spectrin-associated<br>protein 1-like 1                                                | NM_004753                                                                                                       | CAMSAP1L1 |
| 217203_at   | 2.55  | 6.47  |                                                                                                                |                                                                                                                 |           |
| 217232_x_at | -2.09 | -5.00 | hemoglobin, beta                                                                                               | NM_004915 ///<br>NM_016818 ///<br>NM_207174 ///<br>NM_207627 ///<br>NM_207628 ///<br>NM_207629 ///<br>NM_207630 | HBB       |
| 217414_x_at | -2.82 | -9.06 | hemoglobin, alpha 1                                                                                            | NM_001731                                                                                                       | HBA1      |
| 217540_at   | 2.56  | 2.14  |                                                                                                                | NM_030938                                                                                                       |           |
| 217549_at   | 1.96  | 1.90  |                                                                                                                | NM_031477                                                                                                       |           |
| 217552_x_at | -8.35 | -2.36 | complement component<br>(3b/4b) receptor 1<br>(Knops blood group)                                              | NM_016644                                                                                                       | CR1       |
| 217787_s_at | 1.92  | 2.37  | UDP-N-acetyl-alpha-D-<br>galactosamine:polypepti<br>de N-<br>acetylgalactosaminyltra<br>nsferase 2 (GalNAc-T2) |                                                                                                                 | GALNT2    |
| 217788_s_at | 2.01  | 1.76  | UDP-N-acetyl-alpha-D-<br>galactosamine:polypepti<br>de N-<br>acetylgalactosaminyltra<br>nsferase 2 (GalNAc-T2) | NM_006670                                                                                                       | GALNT2    |

|             |       |       |                                                                                |                                                              |            |
|-------------|-------|-------|--------------------------------------------------------------------------------|--------------------------------------------------------------|------------|
| 217867_x_at | -1.76 | -1.74 | beta-site APP-cleaving enzyme 2                                                | NM_203459                                                    | BACE2      |
| 218284_at   | 2.22  | 1.89  | SMAD family member 3                                                           | NM_005734                                                    | SMAD3      |
| 218309_at   | -3.00 | -2.20 | calcium/calmodulin-dependent protein kinase II inhibitor 1                     | NM_018699                                                    | CAMK2N1    |
| 218380_at   | 12.80 | 3.88  | NLR family, pyrin domain containing 1                                          | NM_022488                                                    | NLRP1      |
| 218418_s_at | 2.52  | 2.94  | KN motif and ankyrin repeat domains 2                                          | NM_025189                                                    | KANK2      |
| 218608_at   | 1.75  | 2.10  | ATPase type 13A2                                                               | NM_001945                                                    | ATP13A2    |
| 218718_at   | 2.37  | 2.59  | platelet derived growth factor C                                               | NM_003739                                                    | PDGFC      |
| 218935_at   | 2.70  | 1.95  | EH-domain containing 3 chondroitin sulfate N-acetylgalactosaminyltransferase 1 |                                                              | EHD3       |
| 219049_at   | 2.24  | 1.92  |                                                                                |                                                              | CSGALNACT1 |
| 219338_s_at | 2.50  | 3.25  | leucine rich repeat containing 49                                              | NM_024491                                                    | LRRC49     |
| 219383_at   | 1.89  | 2.89  | SLAM family member 8                                                           | NM_000332                                                    | SLAMF8     |
| 219386_s_at | -2.44 | -1.84 |                                                                                | NM_001031679 ///<br>NM_198080                                |            |
| 219471_at   | 9.04  | 36.04 |                                                                                | chromosome 13 open reading frame 18<br>NM_005935             |            |
| 219478_at   | 2.13  | 3.56  | WAP four-disulfide core domain 1                                               | NM_005619 ///<br>NM_206900 ///<br>NM_206901 ///<br>NM_206902 | WFDC1      |
| 219520_s_at | 2.01  | 2.06  | WWC family member 3                                                            |                                                              | WWC3       |
| 219746_at   | -2.21 | -1.87 | D4, zinc and double PHD fingers, family 3                                      | XM_933721 ///<br>XM_935806 ///<br>XM_943045                  | DPF3       |
| 219799_s_at | 3.01  | 5.50  | dehydrogenase/reductase (SDR family)                                           | XM_929318 ///<br>XM_939083                                   | DHRS9      |
| 219871_at   | 2.82  | 2.11  |                                                                                | NM_000964 ///<br>NM_001024809 ///<br>NM_001033603            |            |
| 219932_at   | 24.98 | 14.23 | solute carrier family 27 (fatty acid transporter), member 6                    | NM_003107                                                    | SLC27A6    |
| 219944_at   | -1.85 | -1.85 | CAP-GLY domain containing linker protein family, member 4                      | NM_007153                                                    | CLIP4      |
| 220014_at   | 2.11  | 3.00  | proline rich 16                                                                | NM_005292                                                    | PRR16      |
| 220030_at   | 1.82  | 4.89  | serine/threonine/tyrosine kinase 1                                             | NM_002214                                                    | STYK1      |
| 220237_at   | 2.08  | 1.84  | ATG3 autophagy related 3 homolog (S.                                           | XM_929541 ///<br>XM_941868                                   | ATG3       |
| 220246_at   | 2.39  | 1.89  | calcium/calmodulin-dependent protein kinase ID                                 | NM_001017523 ///<br>NM_001018072 ///<br>NM_152322            | CAMK1D     |

|             |        |       |                                                                                      |                                                                               |          |
|-------------|--------|-------|--------------------------------------------------------------------------------------|-------------------------------------------------------------------------------|----------|
| 220576_at   | 2.46   | 2.24  | post-GPI attachment to proteins 1                                                    | NM_002841                                                                     | PGAP1    |
| 220593_s_at | 2.27   | 4.01  | coiled-coil domain containing 40                                                     | NM_017554                                                                     | CCDC40   |
| 220726_at   | -18.76 | -2.00 |                                                                                      | NM_001259                                                                     |          |
| 220735_s_at | 1.92   | 1.91  | SUMO1/sentrin specific peptidase 7                                                   | NM_015691                                                                     | SENP7    |
| 220811_at   | -1.79  | -2.00 | proteoglycan 3                                                                       | NM_015074 ///<br>NM_183416                                                    | PRG3     |
| 220891_at   | 2.21   | 1.97  | chromosome 4 open reading frame 23                                                   | NM_006866                                                                     | C4orf23  |
| 220952_s_at | 1.85   | 2.01  | pleckstrin homology domain containing, family A member 5                             | NM_015691                                                                     | PLEKHA5  |
| 220987_s_at | 9.45   | 2.40  | chromosome 11 open reading frame 17                                                  |                                                                               | C11orf17 |
| 221065_s_at | 11.36  | 10.05 | carbohydrate (N-acetylgalactosamine 4-0) sulfotransferase 8                          |                                                                               | CHST8    |
| 221209_s_at | -2.84  | -1.89 | otoraplin                                                                            | NM_004481                                                                     | OTOR     |
| 221213_s_at | 1.87   | 2.09  | zinc finger protein 280D                                                             | NM_015642                                                                     | ZNF280D  |
| 221261_x_at | 42.33  | 1.96  |                                                                                      | NM_002926 ///<br>NM_198227 ///<br>NM_198229                                   |          |
| 221294_at   | 2.59   | 1.79  | RAB GTPase activating protein 1                                                      | NM_002647                                                                     | RABGAP1  |
| 221349_at   | 8.91   | 1.85  | pre-B lymphocyte gene                                                                | NM_153223                                                                     | VPREB1   |
| 221600_s_at | 1.86   | 2.03  | chromosome 11 open reading frame 67                                                  |                                                                               | C11orf67 |
| 221696_s_at | 2.26   | 1.76  | serine/threonine/tyrosine kinase 1                                                   | NM_002919 ///<br>NM_134428                                                    | STYK1    |
| 221773_at   | 2.18   | 1.89  | ELK3, ETS-domain protein (SRF accessory                                              | NM_170662                                                                     | ELK3     |
| 221892_at   | 2.22   | 2.31  | hexose-6-phosphate dehydrogenase                                                     | NM_002350                                                                     | H6PD     |
| 221942_s_at | 2.35   | 2.29  | (glucose 1-guanylate cyclase 1, soluble, alpha 3                                     | NM_030756                                                                     | GUCY1A3  |
| 222146_s_at | 1.75   | 2.15  | transcription factor 4                                                               | NM_024870 ///<br>NM_025170                                                    | TCF4     |
| 222281_s_at | 1.84   | 2.85  |                                                                                      | NM_145307                                                                     |          |
| 222294_s_at | 2.36   | 2.12  |                                                                                      | NM_006017                                                                     |          |
| 222326_at   | 2.30   | 2.09  | phosphodiesterase 4B, cAMP-specific (phosphodiesterase E4 dunce homolog, Drosophila) | NM_003097 ///<br>NM_022805 ///<br>NM_022806 ///<br>NM_022807 ///<br>NM_022808 | PDE4B    |
| 222446_s_at | -2.50  | -2.31 | beta-site APP-cleaving enzyme 2                                                      | NM_006557 ///<br>NM_181872                                                    | BACE2    |
| 222862_s_at | 1.94   | 2.08  | adenylate kinase 5                                                                   | NM_144660                                                                     | AK5      |

|             |       |       |                                                                                                    |                               |                |
|-------------|-------|-------|----------------------------------------------------------------------------------------------------|-------------------------------|----------------|
| 222880_at   | 1.82  | 1.94  | <i>v-akt murine thymoma viral oncogene homolog 3 (protein kinase B, yippee-like 3 (Drosophila)</i> | NM_139015                     | AKT3           |
| 223179_at   | 2.11  | 2.25  | <i>optineurin</i>                                                                                  | NM_001024912 ///<br>NM_001712 | YPEL3          |
| 223276_at   | 1.94  | 1.80  | <i>DnaJ (Hsp40) homolog, subfamily C, member 4</i>                                                 | NM_007118                     | OPTN<br>DNAJC4 |
| 223316_at   | 17.25 | 14.78 | <i>polybromo 1</i>                                                                                 | NM_015864                     | PBRM1          |
| 223371_s_at | -1.96 | -2.04 | <i>SUMO1/sentrin specific peptidase 7</i>                                                          | NM_031277                     | SEN7           |
| 223399_x_at | 2.47  | 5.49  | <i>THAP domain containing, apoptosis associated protein 2</i>                                      | NM_017523 ///<br>NM_199139    | THAP2          |
| 223444_at   | 2.30  | 2.01  | <i>zinc finger, SWIM-type containing 1</i>                                                         | NM_006851                     | ZSWIM1         |
| 223588_at   | 2.74  | 2.02  | <i>doublesex and mab-3 related transcription factor 2</i>                                          |                               | DMRT2          |
| 223607_x_at | -2.01 | -1.83 | <i>C1q and tumor necrosis factor related protein 4</i>                                             | NM_018660                     | C1QTNF4        |
| 223704_s_at | 1.98  | 11.58 |                                                                                                    |                               |                |
| 223708_at   | 9.97  | 10.48 |                                                                                                    |                               |                |
| 223800_s_at | 2.50  | 1.94  |                                                                                                    | NM_004354                     |                |

|             |       |       |                                               |                                                                                                                                                                                                                                                                                                                                                                                                                                                                                                                                                              |         |
|-------------|-------|-------|-----------------------------------------------|--------------------------------------------------------------------------------------------------------------------------------------------------------------------------------------------------------------------------------------------------------------------------------------------------------------------------------------------------------------------------------------------------------------------------------------------------------------------------------------------------------------------------------------------------------------|---------|
| 223900_s_at | 2.96  | 2.74  | polybromo 1                                   | XM_927922 ///<br>XM_928908 ///<br>XM_932380 ///<br>XM_932385 ///<br>XM_932390 ///<br>XM_932395 ///<br>XM_932400 ///<br>XM_932405 ///<br>XM_932411 ///<br>XM_932414 ///<br>XM_933267 ///<br>XM_933270 ///<br>XM_933273 ///<br>XM_933285 ///<br>XM_933287 ///<br>XM_933290 ///<br>XM_933292 ///<br>XM_935561 ///<br>XM_935606 ///<br>XM_935859 ///<br>XM_935861 ///<br>XM_935863 ///<br>XM_935864 ///<br>XM_935866 ///<br>XM_935868 ///<br>XM_935869 ///<br>XM_935870 ///<br>XM_935896 ///<br>XM_935897 ///<br>XM_935898 ///<br>XM_935899 ///<br>XM_935900 /// | PBRM1   |
| 223952_x_at | 4.00  | 9.93  | dehydrogenase/reductase (SDR family) member 9 | NM_001032394 ///<br>NM_001032395 ///<br>NM_020455 ///<br>NM_198569                                                                                                                                                                                                                                                                                                                                                                                                                                                                                           | DHRS9   |
| 224009_x_at | 3.02  | 7.37  | dehydrogenase/reductase (SDR family) member 9 | NM_002847 ///<br>NM_130842 ///<br>NM_130843                                                                                                                                                                                                                                                                                                                                                                                                                                                                                                                  | DHRS9   |
| 224328_s_at | -2.51 | -2.36 | late cornified envelope                       |                                                                                                                                                                                                                                                                                                                                                                                                                                                                                                                                                              | LCE3D   |
| 224383_at   | 1.97  | 11.00 | ring finger protein 17                        | NM_003097 ///<br>NM_022805 ///<br>NM_022806 ///<br>NM_022807 ///<br>NM_022808                                                                                                                                                                                                                                                                                                                                                                                                                                                                                | RNF17   |
| 224402_s_at | 4.82  | 2.53  | Fc receptor-like 4                            | NM_032947                                                                                                                                                                                                                                                                                                                                                                                                                                                                                                                                                    | FCRL4   |
| 224403_at   | 4.70  | 29.09 | Fc receptor-like 4                            | NM_001025930 ///<br>NM_015644                                                                                                                                                                                                                                                                                                                                                                                                                                                                                                                                | FCRL4   |
| 224609_at   | 2.20  | 1.85  | solute carrier family 44, member 2            | NM_130387                                                                                                                                                                                                                                                                                                                                                                                                                                                                                                                                                    | SLC44A2 |

|             |       |        |                                                            |                                                                                                                                                            |          |
|-------------|-------|--------|------------------------------------------------------------|------------------------------------------------------------------------------------------------------------------------------------------------------------|----------|
| 224799_at   | -2.27 | -2.04  | <i>Nedd4 family interacting protein 2</i>                  | NM_001006600 ///<br>NM_018695                                                                                                                              | NDFIP2   |
| 224836_at   | 4.19  | 4.89   | <i>tumor protein p53</i>                                   | NM_152446                                                                                                                                                  | TP53INP2 |
| 224917_at   | 1.97  | 2.13   | <i>microRNA 21</i>                                         | NM_001037339 ///<br>NM_001037340 ///<br>NM_001037341 ///<br>NM_002600                                                                                      | MIRN21   |
| 224941_at   | -4.12 | -2.78  | <i>pregnancy-associated plasma protein A,</i>              | NM_004585                                                                                                                                                  | PAPPA    |
| 225056_at   | 6.40  | 8.64   | <i>signal-induced proliferation-associated copine II</i>   | NM_012093 ///<br>NM_174858                                                                                                                                 | SIPA1L2  |
| 225129_at   | 1.80  | 1.78   |                                                            | NM_006264 ///<br>NM_080683 ///<br>NM_080684 ///<br>NM_080685                                                                                               | CPNE2    |
| 225150_s_at | 15.10 | 1.99   | <i>rhotekin</i>                                            | NM_000699 ///<br>NM_001008218 ///<br>NM_001008219 ///<br>NM_001008221 ///<br>NM_004038 ///<br>NM_020978 ///<br>XM_936407 ///<br>XM_937845 ///<br>XM_942801 | RTKN     |
| 225166_at   | 1.80  | 1.88   | <i>Rho GTPase activating protein 18</i>                    |                                                                                                                                                            | ARHGAP18 |
| 225237_s_at | 1.87  | 1.92   | <i>musashi homolog 2 (Drosophila)</i>                      | NM_020654                                                                                                                                                  | MSI2     |
| 225239_at   | 1.88  | 2.14   |                                                            | NM_004543                                                                                                                                                  |          |
| 225273_at   | 2.02  | 2.33   | <i>WWC family member 3</i>                                 |                                                                                                                                                            | WWC3     |
| 225583_at   | 1.79  | 1.77   | <i>UDP-glucuronate decarboxylase 1</i>                     | NM_004481                                                                                                                                                  | UXS1     |
| 225688_s_at | 1.83  | 4.40   | <i>pleckstrin homology-like domain, family B, member 2</i> | NM_012417 ///<br>NM_181671                                                                                                                                 | PHLDB2   |
| 225706_at   | 1.80  | 2.06   | <i>glucocorticoid induced transcript 1</i>                 | NM_181504 ///<br>NM_181523 ///<br>NM_181524                                                                                                                | GLCCI1   |
| 225782_at   | 2.06  | 1.84   | <i>methionine sulfoxide reductase B3</i>                   | NM_001031804 ///<br>NM_005360                                                                                                                              | MSRB3    |
| 225798_at   | -2.00 | -1.92  | <i>JAZF zinc finger 1</i>                                  | NM_000115 ///<br>NM_003991                                                                                                                                 | JAZF1    |
| 225817_at   | 28.71 | 337.00 | <i>cingulin-like 1</i>                                     | NM_015110                                                                                                                                                  | CGNL1    |
| 225950_at   | 1.98  | 2.57   | <i>sterile alpha motif domain containing 8</i>             | NM_001121 ///<br>NM_016824 ///<br>NM_019903                                                                                                                | SAMD8    |
| 226136_at   | 1.89  | 3.00   |                                                            | NM_005410                                                                                                                                                  |          |
| 226142_at   | 1.96  | 2.89   | <i>GLI pathogenesis-related 1 (glioma)</i>                 | XM_930500 ///<br>XM_935094 ///<br>XM_942528 ///<br>XM_946076                                                                                               | GLIPR1   |

|             |       |       |                                            |                  |         |
|-------------|-------|-------|--------------------------------------------|------------------|---------|
| 226145_s_at | 4.10  | 4.44  | Fraser syndrome 1                          | NM_015263        | FRAS1   |
| 226189_at   | 2.04  | 3.40  | integrin, beta 8                           |                  | ITGB8   |
| 226250_at   | 2.00  | 1.89  |                                            |                  |         |
| 226252_at   | 1.92  | 2.02  |                                            |                  |         |
| 226279_at   | 6.73  | 3.53  | protease, serine, 23                       | NM_173808        | PRSS23  |
| 226302_at   | 3.49  | 2.52  |                                            | NM_052905        |         |
| 226382_at   | 1.89  | 2.80  |                                            | NM_000110        |         |
| 226388_at   | 2.94  | 2.70  | transcription elongation factor A (SII), 3 | NM_001001787 /// | TCEA3   |
|             |       |       | NHS-like 1                                 | NM_001677        |         |
| 226490_at   | 2.30  | 4.27  |                                            | NM_002299        | NHSL1   |
| 226657_at   | 2.74  | 2.01  |                                            | NM_138959        |         |
| 226725_at   | 3.59  | 1.93  |                                            |                  |         |
| 226757_at   | 2.89  | 5.83  | interferon-induced protein with            | NM_015642        | IFIT2   |
| 226959_at   | 2.11  | 1.88  |                                            |                  |         |
| 227051_at   | -2.72 | -3.33 |                                            | NM_024841        |         |
| 227132_at   | 1.81  | 1.81  | zinc finger protein 706                    | NM_001723 ///    | ZNF706  |
|             |       |       |                                            | NM_015548 ///    |         |
|             |       |       |                                            | NM_020388 ///    |         |
|             |       |       |                                            | NM_183380        |         |
| 227174_at   | 2.68  | 2.62  | WD repeat domain 72                        | NM_152777        | WDR72   |
| 227195_at   | 3.84  | 13.18 | zinc finger protein 503                    | NM_002403 ///    | ZNF503  |
|             |       |       |                                            | NM_017459        |         |
| 227197_at   | 6.17  | 5.31  |                                            | XM_043272 ///    |         |
|             |       |       |                                            | XM_933967 ///    |         |
|             |       |       |                                            | XM_941783 ///    |         |
|             |       |       |                                            | XM_945439        |         |
| 227235_at   | 2.57  | 2.80  | guanylate cyclase 1, soluble, alpha 3      | NM_005114        | GUCY1A3 |
| 227290_at   | 1.80  | 1.82  |                                            | NM_194291        |         |
| 227297_at   | 2.42  | 2.31  | integrin, alpha 9                          | NM_007001        | ITGA9   |
| 227312_at   | -2.72 | -2.11 | syntrophin, beta 2                         | NM_001536 ///    | SNTB2   |
|             |       |       | (dystrophin-associated protein A1, 59kDa,  | NM_198318 ///    |         |
|             |       |       |                                            | NM_198319        |         |
| 227319_at   | 3.33  | 2.10  |                                            |                  |         |
| 227444_at   | 1.90  | 14.05 | armadillo repeat containing, X-linked 4    | NM_005101        | ARMCX4  |
| 227529_s_at | -2.87 | -2.71 | A kinase (PRKA) anchor protein (gravin) 12 |                  | AKAP12  |
| 227530_at   | -2.30 | -3.30 | A kinase (PRKA) anchor protein (gravin) 12 | NM_138962 ///    | AKAP12  |
|             |       |       |                                            | NM_170721        |         |
| 227609_at   | 3.37  | 1.94  | epithelial stromal interaction 1 (breast)  | NM_001002843 /// | EPSTI1  |
|             |       |       |                                            | NM_001002844 /// |         |
|             |       |       |                                            | NM_017661        |         |
| 227834_at   | 21.31 | 75.43 | taxilin beta                               | NM_024684        | TXLNB   |
| 227839_at   | 5.56  | 1.92  | methyl-CpG binding domain protein 5        |                  | MBD5    |
| 227929_at   | -1.88 | -2.42 |                                            | NM_152703        |         |
| 227949_at   | 2.47  | 3.04  | phosphatase and actin regulator 3          |                  | PHACTR3 |
| 228081_at   | 1.95  | 2.37  | cyclin G2                                  | NM_178527        | CCNG2   |

|             |       |       |                                                                                            |                                                              |         |
|-------------|-------|-------|--------------------------------------------------------------------------------------------|--------------------------------------------------------------|---------|
| 228108_at   | 2.68  | 3.63  |                                                                                            | NM_019012                                                    |         |
| 228128_x_at | -3.95 | -2.40 | <i>pregnancy-associated plasma protein A, pappalysin 1</i>                                 | NM_001121 ///<br>NM_016824 ///<br>NM_019903                  | PAPPA   |
| 228174_at   | 2.51  | 2.25  | <i>golgi autoantigen, golgin subfamily a, 1</i>                                            | NM_001423                                                    | GOLGA1  |
| 228285_at   | 3.09  | 9.42  | <i>tudor domain containing 9</i>                                                           | XM_930677 ///<br>XM_945048                                   | TDRD9   |
| 228297_at   | 3.65  | 2.51  | <i>calponin 3, acidic</i>                                                                  |                                                              | CNN3    |
| 228574_at   | 2.20  | 1.92  | <i>transmembrane and tetratricopeptide repeat containing 2</i>                             | NM_006526                                                    | TMTC2   |
| 228617_at   | 2.45  | 2.04  | <i>XIAP associated factor</i>                                                              |                                                              | XAF1    |
| 228779_at   | 3.09  | 2.01  |                                                                                            | NM_004755 ///<br>NM_182398                                   |         |
| 228788_at   | 2.72  | 2.90  | <i>yippee-like 1 (Drosophila)</i>                                                          | NM_004755 ///<br>NM_182398                                   | YPEL1   |
| 228790_at   | 13.90 | 4.01  | <i>family with sequence similarity 110, member PR domain containing 1, with ZNF domain</i> | NM_002166                                                    | FAM110B |
| 228964_at   | 2.67  | 2.73  | <i>zinc finger protein 449</i>                                                             | NM_000740                                                    | PRDM1   |
| 228968_at   | 1.81  | 1.78  |                                                                                            | NM_145753                                                    | ZNF449  |
| 229011_at   | 1.90  | 2.77  |                                                                                            | NM_001423                                                    |         |
| 229057_at   | 14.00 | 4.93  | <i>sodium channel, voltage-gated, type II, alpha subunit</i>                               | NM_153704                                                    | SCN2A   |
| 229090_at   | 2.17  | 1.76  |                                                                                            | NM_019012                                                    |         |
| 229134_at   | 1.89  | 2.39  | <i>vang-like 1 (van gogh, Drosophila)</i>                                                  | NM_004803                                                    | VANGL1  |
| 229199_at   | 2.26  | 4.75  |                                                                                            | NM_004354                                                    |         |
| 229280_s_at | 2.37  | 2.06  |                                                                                            | NM_004449 ///<br>NM_182918                                   |         |
| 229309_at   | 1.76  | 2.41  |                                                                                            |                                                              |         |
| 229336_at   | -2.04 | -2.35 | <i>ST3 beta-galactoside alpha-2,3-sialyltransferase 2</i>                                  | NM_005465 ///<br>NM_181690                                   | ST3GAL2 |
| 229450_at   | 3.44  | 2.93  |                                                                                            | NM_004580 ///<br>NM_183234 ///<br>NM_183235 ///<br>NM_183236 |         |
| 229461_x_at | 5.68  | 5.49  | <i>neuronal growth</i>                                                                     | NM_018423                                                    | NEGR1   |
| 229530_at   | 3.07  | 2.30  | <i>guanylate cyclase 1, soluble, alpha 3</i>                                               | NM_030938                                                    | GUCY1A3 |
| 229581_at   | -1.90 | -3.91 | <i>extracellular leucine-rich repeat and fibronectin type III domain</i>                   | NM_152695                                                    | ELFN1   |
| 229623_at   | 1.76  | 1.99  |                                                                                            | NM_001121 ///<br>NM_016824 ///<br>NM_019903                  |         |
| 229638_at   | 22.24 | 6.05  | <i>iroquois homeobox 3</i>                                                                 | NM_001039506 ///<br>NM_006020                                | IRX3    |



|             |       |       |                                                                               |                                                                                                                                                                                                                                                                                                                                                                                                                                                                                                                                                              |          |
|-------------|-------|-------|-------------------------------------------------------------------------------|--------------------------------------------------------------------------------------------------------------------------------------------------------------------------------------------------------------------------------------------------------------------------------------------------------------------------------------------------------------------------------------------------------------------------------------------------------------------------------------------------------------------------------------------------------------|----------|
| 229756_at   | 1.83  | 3.96  | <i>inhibitor of DNA binding 2, dominant negative helix-loop-helix protein</i> | NM_000969                                                                                                                                                                                                                                                                                                                                                                                                                                                                                                                                                    | ID2      |
| 230036_at   | 1.85  | 1.91  | <i>sterile alpha motif domain containing 9-like</i>                           | NM_172004                                                                                                                                                                                                                                                                                                                                                                                                                                                                                                                                                    | SAMD9L   |
| 230147_at   | -2.83 | -3.38 | <i>coagulation factor II (thrombin) receptor-like 2</i>                       | NM_001042510 ///<br>NM_001042511 ///<br>NM_016096                                                                                                                                                                                                                                                                                                                                                                                                                                                                                                            | F2RL2    |
| 230224_at   | 2.62  | 2.13  | <i>mitochondrial carrier triple repeat 6</i>                                  |                                                                                                                                                                                                                                                                                                                                                                                                                                                                                                                                                              | MCART6   |
| 230252_at   | -1.75 | -2.36 | <i>lysophosphatidic acid receptor 5</i>                                       | NM_018182                                                                                                                                                                                                                                                                                                                                                                                                                                                                                                                                                    | LPAR5    |
| 230302_at   | 10.69 | 1.94  |                                                                               | NM_001042437 ///<br>NM_003896                                                                                                                                                                                                                                                                                                                                                                                                                                                                                                                                |          |
| 230381_at   | -2.28 | -2.12 | <i>chromosome 1 open reading frame 186</i>                                    | NM_004892                                                                                                                                                                                                                                                                                                                                                                                                                                                                                                                                                    | C1orf186 |
| 230383_x_at | 3.14  | 3.35  |                                                                               | NM_001560                                                                                                                                                                                                                                                                                                                                                                                                                                                                                                                                                    |          |
| 230403_at   | 1.77  | 1.89  |                                                                               | NM_002588 ///<br>NM_003735 ///<br>NM_003736 ///<br>NM_014004 ///<br>NM_018912 ///<br>NM_018913 ///<br>NM_018914 ///<br>NM_018915 ///<br>NM_018916 ///<br>NM_018917 ///<br>NM_018918 ///<br>NM_018919 ///<br>NM_018920 ///<br>NM_018921 ///<br>NM_018922 ///<br>NM_018923 ///<br>NM_018924 ///<br>NM_018925 ///<br>NM_018926 ///<br>NM_018927 ///<br>NM_018928 ///<br>NM_018929 ///<br>NM_031993 ///<br>NM_032009 ///<br>NM_032011 ///<br>NM_032053 ///<br>NM_032054 ///<br>NM_032086 ///<br>NM_032087 ///<br>NM_032088 ///<br>NM_032089 ///<br>NM_032090 /// |          |
| 230469_at   | 1.99  | 2.43  | <i>rhotekin 2</i>                                                             | NM_012199                                                                                                                                                                                                                                                                                                                                                                                                                                                                                                                                                    | RTKN2    |

|             |       |       |                                                                                              |                                                                                                               |          |
|-------------|-------|-------|----------------------------------------------------------------------------------------------|---------------------------------------------------------------------------------------------------------------|----------|
| 230503_at   | -9.43 | -2.66 | sterile alpha motif domain containing 4A                                                     | NM_017640                                                                                                     | SAMD4A   |
| 230587_at   | 5.45  | 6.02  |                                                                                              |                                                                                                               |          |
| 230793_at   | 1.80  | 1.94  | leucine rich repeat containing 16A                                                           | NM_033515                                                                                                     | LRRC16A  |
| 230894_s_at | 1.90  | 4.53  |                                                                                              |                                                                                                               |          |
| 230944_at   | -2.92 | -2.07 | chromosome 6 open reading frame 223                                                          | NM_138426                                                                                                     | C6orf223 |
| 231034_s_at | 2.60  | 2.25  |                                                                                              | NM_005465 ///<br>NM_181690                                                                                    |          |
| 231067_s_at | -2.27 | -1.85 | A kinase (PRKA) anchor protein (gravin) 12                                                   | NM_152727                                                                                                     | AKAP12   |
| 231116_at   | 1.95  | 2.09  | chromosome 1 open reading frame 204                                                          | NM_000725                                                                                                     | C1orf204 |
| 231166_at   | -7.73 | -2.03 | G protein-coupled receptor 155                                                               | NM_006866                                                                                                     | GPR155   |
| 231697_s_at | 2.12  | 3.27  | transmembrane protein                                                                        |                                                                                                               | TMEM49   |
| 231838_at   | 1.85  | 1.88  | poly(A) binding protein, cytoplasmic 1-like                                                  | NM_007085                                                                                                     | PABPC1L  |
| 231909_x_at | 3.75  | 2.95  | outer dense fiber of sperm tails 2-like                                                      | NM_015864                                                                                                     | ODF2L    |
| 231929_at   | -2.52 | -2.00 |                                                                                              | NM_004580 ///<br>NM_183234 ///<br>NM_183235 ///<br>NM_183236                                                  |          |
| 231964_at   | 1.81  | 2.00  |                                                                                              | NM_024021 ///<br>NM_148975                                                                                    |          |
| 232098_at   | 1.88  | 1.76  | dystonin                                                                                     | NM_018349                                                                                                     | DST      |
| 232136_s_at | -2.18 | -1.87 | cortactin binding protein                                                                    | NM_025076                                                                                                     | CTTNBP2  |
| 232206_at   | -2.93 | -2.20 | unc-51-like kinase 4 (C. elegans)                                                            | NM_001015880 ///<br>NM_004670                                                                                 | ULK4     |
| 232212_at   | -3.10 | -2.24 | pleckstrin homology domain containing, family A (phosphoinositide binding specific) member 8 | NM_001033569 ///<br>NM_001033570 ///<br>NM_001033571 ///<br>NM_001033572 ///<br>NM_001033574 ///<br>NM_016627 | PLEKHA8  |
| 232252_at   | 2.61  | 2.96  | dual specificity phosphatase 27                                                              | NM_006298                                                                                                     | DUSP27   |
| 232297_at   | 1.74  | 2.31  |                                                                                              | NM_024503                                                                                                     |          |
| 232465_at   | 2.77  | 2.28  | transcription factor 7-like 2 (T-cell specific, poly (ADP-ribose) polymerase family,         | NM_004566                                                                                                     | TCF7L2   |
| 232610_at   | 2.03  | 2.07  | SLIT and NTRK-like family, member 4                                                          | NR_002720                                                                                                     | PARP14   |
| 232636_at   | 4.27  | 4.16  |                                                                                              | NM_001039697                                                                                                  | SLITRK4  |
| 232914_s_at | 2.13  | 2.36  | synaptotagmin-like 2                                                                         |                                                                                                               | SYTL2    |
| 232959_at   | -2.16 | -2.63 |                                                                                              | NM_001005176 ///<br>NM_007237                                                                                 |          |

|             |       |       |                                                              |                                                              |           |
|-------------|-------|-------|--------------------------------------------------------------|--------------------------------------------------------------|-----------|
| 233020_at   | 1.80  | 2.46  | SEC22 vesicle trafficking protein homolog B (S.              |                                                              | SEC22B    |
| 233051_at   | -6.91 | -1.94 | SLIT and NTRK-like family, member 2                          | NM_003793                                                    | SLITRK2   |
| 233079_at   | 3.46  | 5.09  | c-mer proto-oncogene tyrosine kinase                         |                                                              | MERTK     |
| 233246_at   | 2.20  | 1.86  | chromosome 9 open reading frame 126                          | NM_006379                                                    | C9orf126  |
| 233296_x_at | 1.89  | 1.90  | zinc finger and BTB domain containing 20                     | NM_000443 ///<br>NM_000927 ///<br>NM_018849 ///<br>NM_018850 | ZBTB20    |
| 233377_at   | 2.53  | 2.27  | AT rich interactive domain 5B (MRF1-like)                    | NM_198281                                                    | ARID5B    |
| 233430_at   | -5.37 | -2.36 | TBC1 domain family, member 22B                               | NM_145804                                                    | TBC1D22B  |
| 233587_s_at | 5.13  | 5.05  | signal-induced proliferation-associated                      | XM_496707 ///<br>XM_938685                                   | SIPA1L2   |
| 233614_at   | 2.00  | 1.79  | Cas-Br-M (murine) ecotropic retroviral transforming sequence |                                                              | CBLB      |
| 233627_at   | -2.17 | -1.81 | megakaryoblastic                                             | NM_003253                                                    | MKL1      |
| 233691_at   | 1.76  | 2.25  | ankyrin repeat and BTB (POZ) domain containing 2             | NM_001121 ///<br>NM_016824 ///<br>NM_019903                  | ABTB2     |
| 234125_at   | 1.94  | 1.92  | erbB2 interacting protein                                    | NM_022089                                                    | ERBB2IP   |
| 234217_at   | -2.30 | -2.12 | GDP-mannose 4,6-dehydratase                                  | NM_178173                                                    | GMDS      |
| 234563_at   | 6.04  | 17.49 | phosphodiesterase 3A, cGMP-inhibited                         | NM_003199                                                    | PDE3A     |
| 234805_at   | -2.95 | -2.45 | ATPase family, AAA domain containing 1                       | NM_001062                                                    | ATAD1     |
| 234862_at   | 2.47  | 2.04  |                                                              |                                                              |           |
| 235046_at   | 7.05  | 5.92  |                                                              | NM_004612                                                    |           |
| 235212_at   | 8.64  | 8.47  | chromosome 14 open reading frame 102                         | NM_005407                                                    | C14orf102 |
| 235264_at   | 2.07  | 2.36  |                                                              | NM_020400                                                    |           |
| 235401_s_at | 3.23  | 14.14 | Fc receptor-like A                                           | XM_373347 ///<br>XM_937675                                   | FCRLA     |
| 235422_at   | 1.79  | 2.57  | archaelysin family metallopeptidase 2                        | NM_012105 ///<br>NM_138991 ///<br>NM_138992                  | AMZ2      |
| 235456_at   | 1.84  | 2.02  |                                                              | NM_000072 ///<br>NM_001001547 ///<br>NM_001001548            |           |
| 235754_at   | -2.05 | -3.30 | hemochromatosis                                              | NM_001935                                                    | HFE       |
| 235764_at   | 2.10  | 2.79  | PR domain containing 5                                       | NM_005723                                                    | PRDM5     |
| 235766_x_at | 2.36  | 2.44  |                                                              | NM_003542                                                    |           |

|             |       |       |                                                          |                                                                                                |         |
|-------------|-------|-------|----------------------------------------------------------|------------------------------------------------------------------------------------------------|---------|
| 235775_at   | 2.85  | 2.48  | transmembrane and tetratricopeptide repeat containing 2  | NM_006093                                                                                      | TMTC2   |
| 236034_at   | 3.56  | 38.22 |                                                          | NM_001640                                                                                      |         |
| 236199_at   | -2.28 | -4.38 | arachidonate 5-lipoxygenase                              | NM_000517 ///<br>NM_000558                                                                     | ALOX5   |
| 236565_s_at | 8.88  | 5.95  | La ribonucleoprotein domain family, member 6             | NM_019624 ///<br>NM_019625 ///<br>NM_203444 ///<br>NM_203445                                   | LARP6   |
| 236721_at   | 1.81  | 2.26  | alkB, alkylation repair homolog 1 (E. coli)              | NM_000362                                                                                      | ALKBH1  |
| 236738_at   | 2.87  | 4.32  |                                                          | NM_198098                                                                                      |         |
| 236832_at   | 1.91  | 2.05  |                                                          | NM_024692                                                                                      |         |
| 237061_at   | 2.23  | 1.76  | zinc finger protein 347                                  | NM_002704                                                                                      | ZNF347  |
| 237261_at   | 17.21 | 1.83  |                                                          | NM_006563                                                                                      |         |
| 237444_at   | 1.82  | 2.06  |                                                          |                                                                                                |         |
| 237446_at   | -1.91 | -7.55 |                                                          | NM_182529                                                                                      |         |
| 237483_at   | 3.03  | 2.58  | pleckstrin homology domain containing, family A member 5 | NM_000238 ///<br>NM_172056 ///<br>NM_172057                                                    | PLEKHA5 |
| 237514_at   | 27.93 | 7.62  |                                                          | XM_374386 ///<br>XM_935649 ///<br>XM_941372                                                    |         |
| 237725_x_at | 1.91  | 2.02  | structural maintenance of chromosomes 5                  |                                                                                                | SMC5    |
| 237917_at   | 2.34  | 1.83  | neuroblastoma                                            | NM_005528                                                                                      | NBPF9   |
| 238032_at   | 2.12  | 2.37  | dehydrogenase/reductase (SDR family)                     | NM_175619 ///<br>XM_941237                                                                     | DHRS3   |
| 238045_at   | 1.88  | 2.08  | transmembrane protein 65                                 | NM_000184 ///<br>NM_000559                                                                     | TMEM65  |
| 238154_at   | 2.06  | 2.15  | centrosomal protein                                      |                                                                                                | CEP70   |
| 238174_at   | 2.45  | 1.77  | F-box and leucine-rich repeat protein 17                 | NM_000477                                                                                      | FBXL17  |
| 238292_at   | -2.28 | -4.28 | SFT2 domain containing                                   | NM_005332                                                                                      | SFT2D1  |
| 238497_at   | 3.05  | 5.27  | transmembrane protein 136                                | NM_175061                                                                                      | TMEM136 |
| 238614_x_at | 2.08  | 2.26  | zinc finger protein 430                                  | NM_002662                                                                                      | ZNF430  |
| 238649_at   | 4.37  | 2.28  | phosphatidylinositol transfer protein, cytoplasmic 1     | NM_003711 ///<br>NM_176895                                                                     | PITPNC1 |
| 238668_at   | 2.01  | 2.18  |                                                          | NM_182568 ///<br>XM_930399 ///<br>XM_934726 ///<br>XM_934727 ///<br>XM_934728 ///<br>XM_934729 |         |
| 238692_at   | 2.03  | 3.57  | BTB (POZ) domain containing 11                           | NM_080603                                                                                      | BTBD11  |
| 238874_at   | 3.78  | 4.77  |                                                          | NM_000519                                                                                      |         |
| 239036_at   | 1.80  | 1.96  | eukaryotic translation initiation factor 2C, 1           | NM_006927                                                                                      | EIF2C1  |

|             |       |       |                                                                                                      |                                                                                                                                                                                     |         |
|-------------|-------|-------|------------------------------------------------------------------------------------------------------|-------------------------------------------------------------------------------------------------------------------------------------------------------------------------------------|---------|
| 239205_s_at | -6.67 | -2.84 | complement component<br>(3b/4b) receptor 1<br>(Knops blood group)                                    | NM_000410 ///<br>NM_139002 ///<br>NM_139003 ///<br>NM_139004 ///<br>NM_139005 ///<br>NM_139006 ///<br>NM_139007 ///<br>NM_139008 ///<br>NM_139009 ///<br>NM_139010 ///<br>NM_139011 | CR1     |
| 239272_at   | 2.20  | 4.60  | matrix metalloproteinase<br>28                                                                       | NM_000573 ///<br>NM_000651                                                                                                                                                          | MMP28   |
| 239287_at   | 4.47  | 2.89  | phosphoinositide-3-<br>kinase, class 3                                                               | NM_030758                                                                                                                                                                           | PIK3C3  |
| 239300_at   | 2.00  | 2.14  |                                                                                                      |                                                                                                                                                                                     |         |
| 239387_at   | 2.38  | 1.97  | UV radiation resistance<br>associated gene                                                           | NM_000395                                                                                                                                                                           | UVRAG   |
| 239476_at   | 1.92  | 2.02  | phosphoinositide-3-<br>kinase, regulatory                                                            | NM_003236                                                                                                                                                                           | PIK3R1  |
| 239529_at   | -2.60 | -1.90 | chromosome 5 open<br>reading frame 20                                                                | NM_000517 ///<br>NM_000558                                                                                                                                                          | C5orf20 |
| 239555_at   | 1.99  | 1.88  | v-yes-1 Yamaguchi<br>sarcoma viral related<br>oncogene homolog                                       | NM_000518                                                                                                                                                                           | LYN     |
| 239559_at   | 1.83  | 3.31  | pleckstrin homology<br>domain containing,<br>family A member 5                                       | NM_020458                                                                                                                                                                           | PLEKHA5 |
| 239605_x_at | 1.74  | 1.86  | transforming growth<br>factor, beta receptor I<br>(activin A receptor type<br>II-like kinase, 53kDa) | XM_027236 ///<br>XM_938197                                                                                                                                                          | TGFBR1  |
| 239619_at   | 1.95  | 1.91  | zinc finger protein 395                                                                              | NM_000517 ///<br>NM_000558                                                                                                                                                          | ZNF395  |
| 239625_at   | 23.29 | 2.56  | phosphatidylinositol<br>transfer protein,<br>cytoplasmic 1                                           | NM_000304 ///<br>NM_153321 ///<br>NM_153322                                                                                                                                         | PITPNC1 |
| 239808_at   | 1.92  | 1.91  |                                                                                                      | NM_002619                                                                                                                                                                           |         |
| 239872_at   | -2.08 | -2.05 | oxysterol binding protein                                                                            | NM_207332                                                                                                                                                                           | OSBP2   |
| 239893_at   | 1.79  | 1.85  | multiple C2 domains,<br>transmembrane 2                                                              | NM_018717                                                                                                                                                                           | MCTP2   |
| 239958_at   | 3.47  | 6.94  | small nuclear<br>ribonucleoprotein<br>polypeptide N                                                  | NM_020831<br>NM_033427<br>NM_000698                                                                                                                                                 | SNRPN   |
| 240000_at   | 1.77  | 4.17  |                                                                                                      |                                                                                                                                                                                     |         |
| 240173_at   | 2.17  | 7.22  |                                                                                                      |                                                                                                                                                                                     |         |
| 240204_at   | 1.99  | 1.80  |                                                                                                      |                                                                                                                                                                                     |         |
| 240380_at   | 2.17  | 1.83  | triple functional domain<br>(PTPRF interacting)                                                      | NM_001828<br>NM_012074                                                                                                                                                              | TRIO    |
| 240399_at   | 1.98  | 2.11  |                                                                                                      |                                                                                                                                                                                     |         |

|             |       |       |                                                                                                |                                             |          |
|-------------|-------|-------|------------------------------------------------------------------------------------------------|---------------------------------------------|----------|
| 240432_x_at | 2.20  | 1.78  |                                                                                                | NM_005100 ///<br>NM_144497                  |          |
| 240454_at   | -2.11 | -2.18 | tetratricopeptide repeat domain 7A                                                             | NM_019080                                   | TTC7A    |
| 240566_at   | 4.31  | 2.17  |                                                                                                | NM_000698                                   |          |
| 240568_at   | 1.80  | 2.28  | v-akt murine thymoma viral oncogene homolog 3 (protein kinase B, retinoic acid receptor, alpha | NM_145169                                   | AKT3     |
| 240630_at   | 2.05  | 1.93  |                                                                                                | NM_003956                                   | RARA     |
| 240696_at   | -3.39 | -2.24 |                                                                                                | NM_001007544                                |          |
| 240728_at   | 3.13  | 3.57  | phospholipase C, beta 4                                                                        | NM_005100 ///<br>NM_144497                  | PLCB4    |
| 240782_at   | 13.61 | 21.86 |                                                                                                | NM_000558                                   |          |
| 240815_at   | 1.77  | 2.81  | sema domain, immunoglobulin domain (Ig), short basic domain, secreted, (semaphorin)            | NM_001500                                   | SEMA3C   |
| 240867_at   | 2.00  | 2.36  | regulatory factor X, 3 (influences HLA class II expression)                                    | NM_000184 ///<br>NM_000559                  | RFX3     |
| 240878_at   | 6.91  | 5.30  | fibroblast growth factor 11                                                                    | NM_000184 ///<br>NM_000559                  | FGF11    |
| 240882_at   | 61.55 | 7.58  |                                                                                                | NM_006902 ///<br>NM_022716                  |          |
| 240948_at   | 5.17  | 2.28  | toll-like receptor 4                                                                           | NM_003711 ///<br>NM_176895                  | TLR4     |
| 240977_at   | 2.18  | 2.57  | leucine-rich repeats and calponin homology (CH) domain containing 1                            |                                             | LRCH1    |
| 241005_at   | -3.78 | -8.34 |                                                                                                | NM_014761                                   |          |
| 241060_x_at | -1.76 | -2.02 | tetraspanin 5                                                                                  | NM_014779                                   | TSPAN5   |
| 241216_at   | 2.01  | 2.46  | kinesin family member                                                                          | NM_020125                                   | KIF1B    |
| 241304_at   | 2.60  | 2.84  |                                                                                                | NM_000518                                   |          |
| 241497_at   | 2.25  | 5.70  |                                                                                                | NM_005100 ///<br>NM_144497                  |          |
| 241564_at   | -1.75 | -2.35 | glyoxalase domain containing 5                                                                 | NM_012105 ///<br>NM_138991 ///<br>NM_138992 | GLOD5    |
| 241646_s_at | 2.05  | 3.91  |                                                                                                | NM_032563                                   |          |
| 241730_at   | 1.77  | 2.10  |                                                                                                |                                             |          |
| 241754_at   | 2.43  | 1.91  | chromosome 9 open reading frame 126                                                            | NM_000518                                   | C9orf126 |
| 241823_at   | -1.98 | -1.82 |                                                                                                | NM_002112                                   |          |
| 241837_at   | 3.10  | 2.57  | AT rich interactive domain 5B (MRF1-like)                                                      | NM_001017927                                | ARID5B   |
| 242002_at   | 2.76  | 3.80  | Na <sup>+</sup> /K <sup>+</sup> transporting ATPase interacting 2                              | NM_130848                                   | NKAIN2   |
| 242015_x_at | -1.79 | -1.99 | N-acylaminoacyl-peptide hydrolase                                                              | NM_003855                                   | APEH     |
| 242079_at   | 2.00  | 2.13  | regulator of G-protein signaling 12                                                            |                                             | RGS12    |

|             |       |       |                                                                       |               |        |
|-------------|-------|-------|-----------------------------------------------------------------------|---------------|--------|
| 242088_at   | 2.83  | 1.89  | <i>kelch-like 24</i>                                                  | NM_006052     | KLHL24 |
| 242134_at   | 2.07  | 2.15  |                                                                       | NM_003711 /// |        |
|             |       |       |                                                                       | NM_176895     |        |
| 242197_x_at | -3.51 | -1.85 | <i>CD36 molecule<br/>(thrombospondin<br/>receptor)</i>                | NM_020485 /// | CD36   |
|             |       |       |                                                                       | NM_138616 /// |        |
|             |       |       |                                                                       | NM_138617 /// |        |
|             |       |       |                                                                       | NM_138618     |        |
| 242234_at   | 1.97  | 2.90  | <i>XIAP associated factor</i>                                         | NM_006750     | XAF1   |
| 242321_at   | 6.15  | 34.00 |                                                                       |               |        |
| 242405_at   | 2.73  | 2.26  | <i>mastermind-like 2<br/>(Drosophila)</i>                             | NM_000517     | MAML2  |
|             |       |       |                                                                       |               |        |
| 242416_at   | 2.03  | 1.75  | <i>protein tyrosine<br/>phosphatase, receptor<br/>type, G</i>         | XM_496963 /// | PTPRG  |
|             |       |       |                                                                       | XM_933431 /// |        |
|             |       |       |                                                                       | XM_936749 /// |        |
|             |       |       |                                                                       | XM_942939     |        |
| 242488_at   | 3.63  | 2.84  |                                                                       | NM_000517 /// |        |
|             |       |       |                                                                       | NM_000558     |        |
| 242559_at   | 23.22 | 2.31  | <i>serine<br/>palmitoyltransferase,<br/>long chain base subunit</i>   | NM_001430     | SPTLC3 |
|             |       |       |                                                                       |               |        |
| 242625_at   | 2.29  | 1.78  | <i>radical S-adenosyl<br/>methionine domain<br/>containing 2</i>      | NM_004101     | RSAD2  |
|             |       |       |                                                                       |               |        |
| 242665_at   | 1.90  | 2.01  | <i>formin-like 2</i>                                                  | NM_020157     | FMNL2  |
| 242681_at   | 3.01  | 2.13  | <i>NAD(P)H<br/>dehydrogenase,</i>                                     | NM_005100 /// | NQO1   |
|             |       |       |                                                                       | NM_144497     |        |
|             |       |       |                                                                       | NM_001870     |        |
| 242798_at   | -2.38 | -1.77 | <i>endothelial PAS domain<br/>protein 1</i>                           | NM_153246     | EPAS1  |
| 242868_at   | -2.83 | -2.43 |                                                                       |               |        |
| 242873_at   | 5.73  | 2.54  | <i>killer cell lectin-like<br/>receptor subfamily C,<br/>member 4</i> | XM_929989 /// | KLRC4  |
|             |       |       |                                                                       | XM_934158 /// |        |
|             |       |       |                                                                       | XM_934164 /// |        |
|             |       |       |                                                                       | XM_934167 /// |        |
|             |       |       |                                                                       | XM_934168 /// |        |
|             |       |       |                                                                       | XM_934169 /// |        |
|             |       |       |                                                                       | XM_934170 /// |        |
|             |       |       |                                                                       | XM_934171 /// |        |
|             |       |       |                                                                       | XM_934172 /// |        |
|             |       |       |                                                                       | XM_934174 /// |        |
|             |       |       |                                                                       | XM_942055 /// |        |
|             |       |       |                                                                       | XM_945658 /// |        |
|             |       |       |                                                                       | XM_945660 /// |        |
|             |       |       |                                                                       | XM_945662 /// |        |
|             |       |       |                                                                       | XM_945665 /// |        |
|             |       |       |                                                                       | XM_945667 /// |        |
|             |       |       |                                                                       | XM_945669 /// |        |
|             |       |       | XM_945672 ///                                                         |               |        |
|             |       |       | XM_945673 ///                                                         |               |        |
|             |       |       | XM_945675 ///                                                         |               |        |
|             |       |       | XM_945676                                                             |               |        |

|             |       |        |                                                                                                                                                |                                                                                                                                                   |          |
|-------------|-------|--------|------------------------------------------------------------------------------------------------------------------------------------------------|---------------------------------------------------------------------------------------------------------------------------------------------------|----------|
| 242876_at   | 2.14  | 2.45   | v-akt murine thymoma viral oncogene homolog 3 (protein kinase B, guanylate binding protein 2, interferon-FYN oncogene related to SRC, FGR, YES | NM_032810                                                                                                                                         | AKT3     |
| 242907_at   | 3.56  | 5.35   | peripheral myelin protein 22                                                                                                                   | NM_018584                                                                                                                                         | GBP2     |
| 243006_at   | 2.14  | 1.96   | family with sequence similarity 20, member A neuronal growth                                                                                   | NM_032639                                                                                                                                         | FYN      |
| 243050_at   | -2.14 | -2.33  |                                                                                                                                                | NM_003864                                                                                                                                         | PMP22    |
| 243221_at   | 4.01  | 2.47   |                                                                                                                                                | NM_005596                                                                                                                                         | FAM20A   |
| 243357_at   | 1.90  | 3.48   |                                                                                                                                                |                                                                                                                                                   | NEGR1    |
| 243386_at   | 3.66  | 7.48   |                                                                                                                                                | NM_000072 ///<br>NM_001001547 ///<br>NM_001001548                                                                                                 |          |
| 243715_at   | -2.01 | -2.57  | phosphatidic acid phosphatase type 2A cyclin-dependent kinase                                                                                  | NM_005020                                                                                                                                         | PPAP2A   |
| 243808_at   | 2.03  | 2.18   |                                                                                                                                                |                                                                                                                                                   | CDK6     |
| 243886_at   | -2.56 | -2.03  |                                                                                                                                                | NM_002581                                                                                                                                         |          |
| 243915_at   | 3.19  | 4.41   | archaelysin family metalloproteinase 2                                                                                                         | NM_002581                                                                                                                                         | AMZ2     |
| 244190_at   | -1.88 | -1.88  | THAP domain                                                                                                                                    | NM_000502                                                                                                                                         | THAP5    |
| 244236_at   | 1.80  | 2.12   | chromosome 17 open reading frame 63                                                                                                            |                                                                                                                                                   | C17orf63 |
| 244291_x_at | 1.84  | 2.04   |                                                                                                                                                | NM_017772                                                                                                                                         |          |
| 244359_s_at | 4.97  | 4.48   |                                                                                                                                                | NM_139265                                                                                                                                         |          |
| 244413_at   | 1.81  | 2.80   | C-type lectin-like 1                                                                                                                           | NM_033414                                                                                                                                         | CLECL1   |
| 244533_at   | 2.37  | 5.68   |                                                                                                                                                | NM_000573 ///<br>NM_000651 ///<br>XM_114735 ///<br>XM_931252 ///<br>XM_931256 ///<br>XM_936496 ///<br>XM_936931 ///<br>XM_943074 ///<br>XM_943081 |          |
| 244551_at   | 2.20  | 1.88   |                                                                                                                                                |                                                                                                                                                   |          |
| 244762_at   | -2.68 | -12.49 | Down syndrome critical region gene 3                                                                                                           | NM_032539                                                                                                                                         | DSCR3    |
| 244764_at   | 1.78  | 2.31   | human immunodeficiency virus type I enhancer binding CD24 molecule                                                                             | NM_001033045 ///<br>NM_152529                                                                                                                     | HIVEP3   |
| 266_s_at    | 9.67  | 10.14  |                                                                                                                                                | NM_000573 ///<br>NM_000651                                                                                                                        | CD24     |
| 34408_at    | 2.27  | 1.75   | reticulon 2                                                                                                                                    | NM_015589                                                                                                                                         | RTN2     |
| 34726_at    | 1.80  | 1.79   | calcium channel, voltage-dependent, beta                                                                                                       | NM_152636                                                                                                                                         | CACNB3   |



|            |      |       |                                                                        |                                                                                                                                  |          |
|------------|------|-------|------------------------------------------------------------------------|----------------------------------------------------------------------------------------------------------------------------------|----------|
| 35626_at   | 4.11 | 2.90  | <i>N</i> -sulfoglucosamine<br>sulfohydrolase<br>(sulfamidase)          | NM_000037 ///<br>NM_020475 ///<br>NM_020476 ///<br>NM_020477 ///<br>NM_020478 ///<br>NM_020479 ///<br>NM_020480 ///<br>NM_020481 | SGSH     |
| 35776_at   | 2.35 | 2.53  | <i>intersectin 1</i> (SH3<br>domain protein)                           | NM_001039654                                                                                                                     | ITSN1    |
| 38037_at   | 2.08 | 2.13  | <i>heparin-binding EGF-<br/>like growth factor</i>                     |                                                                                                                                  | HBEGF    |
| 41387_r_at | 1.88 | 2.07  | <i>jumonji domain<br/>containing 3, histone<br/>lysine demethylase</i> | NM_004815                                                                                                                        | JMJD3    |
| 44790_s_at | 7.24 | 21.64 | <i>chromosome 13 open<br/>reading frame 18</i>                         |                                                                                                                                  | C13orf18 |

---
