# Supplementary material for: Dissection of the Transformation of Primary Human Hematopoietic Cells by the Oncogene NUP98-HOXA9
Source: PubMed Central journal article supplement (PMC2725295; doi:10.1371/journal.pone.0006719), 2009-08-21
Supplement: pone.0006719.s005.pdf [file pone.0006719.s005.pdf]

**Table S5. Genes dysregulated by HOXA9ΔN**

| Probeset I.D. | Fold Change |       | Gene Name                                                                         | Accession Number                                             | Gene Symbol |
|---------------|-------------|-------|-----------------------------------------------------------------------------------|--------------------------------------------------------------|-------------|
|               | Exp.1       | Exp.2 |                                                                                   |                                                              |             |
| 243130_at     | 58.30       | 6.93  |                                                                                   |                                                              |             |
| 230386_at     | 14.50       | 3.20  |                                                                                   |                                                              |             |
| 1557349_at    | 14.10       | 18.96 | <i>arginine-glutamic acid</i>                                                     | NM_001042681                                                 | RERE        |
| 1564642_at    | 12.62       | 15.90 | <i>runt-related transcription factor 1; translocated to, 1 (cyclin D-related)</i> | NM_004349 ///<br>NM_175634 ///<br>NM_175635 ///<br>NM_175636 | RUNX1T1     |
| 224123_at     | 8.91        | 7.26  |                                                                                   |                                                              |             |
| 240878_at     | 8.30        | 3.89  | <i>fibroblast growth factor 11</i>                                                | NM_199339                                                    | FGF11       |
| 204475_at     | 8.27        | 4.87  | <i>matrix metalloproteinase 1 (interstitial collagenase)</i>                      | NM_002421                                                    | MMP1        |
| 1570119_at    | 6.96        | 2.91  | <i>PDS5, regulator of cohesion maintenance, homolog B (S. cerevisiae)</i>         | NM_015032                                                    | PDS5B       |
| 236892_s_at   | 6.69        | 2.40  |                                                                                   |                                                              |             |
| 237058_x_at   | 6.65        | 12.84 | <i>solute carrier family 6 (neurotransmitter transporter, GABA), member 13</i>    | NM_016615                                                    | SLC6A13     |
| 227566_at     | 6.45        | 2.54  |                                                                                   | NM_016522                                                    |             |
| 1560819_a_at  | 6.28        | 4.05  |                                                                                   | XM_373553                                                    |             |
| 210228_at     | 6.19        | 5.73  | <i>colony stimulating factor 2 (granulocyte-macrophage)</i>                       | NM_000758                                                    | CSF2        |
| 234520_at     | 5.80        | 25.82 |                                                                                   |                                                              |             |
| 1562058_at    | 5.75        | 2.05  |                                                                                   |                                                              |             |
| 1564259_at    | 5.03        | 2.15  | <i>ubiquitin specific peptidase 2</i>                                             | NM_004205 ///<br>NM_171997                                   | USP2        |
| 1558982_at    | 4.83        | 2.24  |                                                                                   | XM_927556                                                    |             |
| 216833_x_at   | 4.68        | 2.38  | <i>glycophorin B (MNS blood group)</i>                                            | NM_002100 ///<br>NM_002102 ///<br>NM_198682                  | GYPB        |
| 236284_at     | 4.29        | 5.52  | KIAA0146                                                                          |                                                              | KIAA0146    |
| 230500_at     | 4.26        | 1.92  |                                                                                   |                                                              |             |
| 1554205_s_at  | 4.24        | 2.63  | <i>islet cell autoantigen 1,69kDa-like</i>                                        | NM_138468 ///<br>NM_178231                                   | ICA1L       |
| 214239_x_at   | 4.22        | 1.97  | <i>polycomb group ring finger 2</i>                                               | NM_007144                                                    | PCGF2       |
| 224040_at     | 4.04        | 1.80  | <i>testis-specific transcript, Y-linked 5</i>                                     | NR_001541                                                    | TTY5        |
| 207326_at     | 4.03        | 8.41  | <i>betacellulin</i>                                                               | NM_001729                                                    | BTC         |
| 206077_at     | 3.97        | 2.24  | <i>Kell blood group, metallo-endopeptidase</i>                                    | NM_000420                                                    | KEL         |
| 234097_s_at   | 3.82        | 7.03  | <i>chromosome 6 open reading frame 12</i>                                         | XM_379403 ///<br>XM_945157                                   | C6orf12     |
| 216020_at     | 3.69        | 1.91  | <i>interferon induced with helicase C domain 1</i>                                | NM_022168                                                    | IFIH1       |

|              |      |       |                                                                                                         |                                                              |          |
|--------------|------|-------|---------------------------------------------------------------------------------------------------------|--------------------------------------------------------------|----------|
| 1564158_a_at | 3.65 | 25.39 | Vac14 homolog ( <i>S. cerevisiae</i> )                                                                  | NM_018052                                                    | VAC14    |
| 1556903_at   | 3.37 | 1.89  | midline 2                                                                                               | NM_012216 ///<br>NM_052817                                   | MID2     |
| 221538_s_at  | 3.26 | 2.03  | plexin A1                                                                                               | NM_032242                                                    | PLXNA1   |
| 208462_s_at  | 3.23 | 3.52  | ATP-binding cassette, sub-family C (CFTR/MRP), member 9                                                 | NM_005691 ///<br>NM_020297 ///<br>NM_020298                  | ABCC9    |
| 240539_at    | 3.20 | 1.88  | autism susceptibility candidate 2                                                                       | NM_015570                                                    | AUTS2    |
| 239712_at    | 3.19 | 3.96  |                                                                                                         |                                                              |          |
| 229199_at    | 3.18 | 2.85  |                                                                                                         |                                                              |          |
| 1562741_at   | 3.16 | 2.04  | UBX domain containing 2                                                                                 | NM_014607                                                    | UBXD2    |
| 241516_at    | 3.13 | 1.76  | solute carrier family 5 (sodium/glucose cotransporter), member 12                                       | NM_001042366<br>/// NM_178498                                | SLC5A12  |
| 240728_at    | 3.10 | 3.37  | phospholipase C, beta 4                                                                                 | NM_000933 ///<br>NM_182797                                   | PLCB4    |
| 1554549_a_at | 3.05 | 1.87  | WD repeat domain 20                                                                                     | NM_144574 ///<br>NM_181291 ///<br>NM_181302 ///<br>NM_181308 | WDR20    |
| 1557149_at   | 3.00 | 1.87  |                                                                                                         |                                                              |          |
| 236599_at    | 3.00 | 1.85  | serpin peptidase inhibitor, clade E (nexin, plasminogen                                                 | NM_006216                                                    | SERPINE2 |
| 216509_x_at  | 3.00 | 2.17  | myeloid/lymphoid or mixed-lineage leukemia (trithorax homolog, <i>Drosophila</i> ); translocated to, 10 | NM_001009569<br>/// NM_004641                                | MLLT10   |
| 243250_at    | 2.99 | 1.91  | zinc finger, DHHC-type containing 13                                                                    | NM_001001483<br>/// NM_019028                                | ZDHHC13  |
| 1555122_at   | 2.93 | 2.12  | G protein-coupled receptor 125                                                                          | NM_145290                                                    | GPR125   |
| 240399_at    | 2.83 | 2.05  | triple functional domain                                                                                | NM_007118                                                    | TRIO     |
| 203485_at    | 2.81 | 1.74  | reticulon 1                                                                                             | NM_021136 ///<br>NM_206852 ///<br>NM_206857                  | RTN1     |
| 218330_s_at  | 2.73 | 1.78  | neuron navigator 2                                                                                      | NM_145117 ///<br>NM_182964                                   | NAV2     |
| 240564_x_at  | 2.72 | 2.23  | synuclein, alpha (non A4 component of amyloid precursor)                                                | NM_000345 ///<br>NM_007308                                   | SNCA     |
| 213348_at    | 2.71 | 1.92  | cyclin-dependent kinase                                                                                 | NM_000076                                                    | CDKN1C   |
| 1568777_at   | 2.71 | 5.04  | echinoderm microtubule                                                                                  | NM_183387                                                    | EML5     |
| 1560058_at   | 2.71 | 2.06  |                                                                                                         | NM_001013667                                                 |          |
| 215810_x_at  | 2.63 | 2.08  | dystonin                                                                                                | NM_001723 ///<br>NM_015548 ///<br>NM_020388 ///<br>NM_183380 | DST      |

|              |      |       |                                                                          |                                                                 |           |
|--------------|------|-------|--------------------------------------------------------------------------|-----------------------------------------------------------------|-----------|
| 219411_at    | 2.60 | 2.25  | engulfment and cell motility 3                                           | NM_024712                                                       | ELMO3     |
| 206595_at    | 2.58 | 3.64  | cystatin E/M                                                             | NM_001323                                                       | CST6      |
| 215852_x_at  | 2.57 | 1.76  | chromosome 20 open reading<br>frame 117                                  | NM_199181                                                       | C20orf117 |
| 1568646_x_at | 2.57 | 3.63  | zinc finger protein 208                                                  | NM_007153                                                       | ZNF208    |
| 209442_x_at  | 2.55 | 1.87  | ankyrin 3, node of Ranvier<br>(ankyrin G)                                | NM_001149 ///<br>NM_020987                                      | ANK3      |
| 242805_at    | 2.49 | 1.76  | cyclin C                                                                 | NM_001013399<br>/// NM_005190                                   | CCNC      |
| 1555159_at   | 2.38 | 4.62  | transmembrane protein 74                                                 | NM_153015                                                       | TMEM74    |
| 211479_s_at  | 2.37 | 4.00  | 5-hydroxytryptamine                                                      | NM_000868                                                       | HTR2C     |
| 207754_at    | 2.35 | 1.87  | Ras association (RalGDS/AF-<br>6) domain family (N-terminal)<br>member 8 | NM_007211                                                       | RASSF8    |
| 223995_at    | 2.35 | 1.88  | solute carrier family 12<br>(potassium/chloride                          | NM_020246                                                       | SLC12A9   |
| 1553493_a_at | 2.32 | 24.45 | L-threonine dehydrogenase                                                | NR_001578                                                       | TDH       |
| 235617_x_at  | 2.31 | 3.47  |                                                                          |                                                                 |           |
| 244424_at    | 2.31 | 2.73  |                                                                          |                                                                 |           |
| 243396_at    | 2.29 | 2.26  |                                                                          |                                                                 |           |
| 230706_s_at  | 2.29 | 1.79  | calcium/calmodulin-dependent<br>protein kinase II inhibitor 2            | NM_033259                                                       | CAMK2N2   |
| 219019_at    | 2.29 | 1.83  | leucine-rich repeats and death                                           | NM_018494 ///                                                   | LRDD      |
| 225540_at    | 2.26 | 1.80  | microtubule-associated protein<br>2                                      | NM_001039538<br>/// NM_002374<br>/// NM_031845<br>/// NM_031847 | MAP2      |
| 201269_s_at  | 2.25 | 3.53  | NudC domain containing 3                                                 | NM_015332                                                       | NUDCD3    |
| 1564121_at   | 2.24 | 1.97  | active BCR-related gene                                                  | NM_001092 ///<br>NM_021962                                      | ABR       |
| 216341_s_at  | 2.22 | 19.83 | gonadotropin-releasing<br>hormone receptor                               | NM_000406 ///<br>NM_001012763                                   | GNRHR     |
| 230812_at    | 2.21 | 1.84  |                                                                          |                                                                 |           |
| 227599_at    | 2.18 | 1.92  | chromosome 3 open reading<br>frame 59                                    | NM_178496                                                       | C3orf59   |
| 220891_at    | 2.17 | 2.35  | chromosome 4 open reading<br>frame 23                                    | NM_152544                                                       | C4orf23   |
| 216813_at    | 2.17 | 1.74  |                                                                          |                                                                 |           |
| 235541_at    | 2.12 | 2.62  | LAS1-like ( <i>S. cerevisiae</i> )                                       | NM_031206                                                       | LAS1L     |
| 231172_at    | 2.12 | 3.65  | chromosome 9 open reading<br>frame 117                                   | NM_001012502                                                    | C9orf117  |
| 243746_at    | 2.12 | 2.78  |                                                                          |                                                                 |           |
| 235844_at    | 2.12 | 2.28  | putative homeodomain                                                     | NM_006608                                                       | PHTF1     |
| 1553533_at   | 2.09 | 2.55  | junctophilin 1                                                           | NM_020647                                                       | JPH1      |
| 1570111_at   | 2.09 | 4.17  | chromosome 14 open reading<br>frame 48                                   | NM_152777                                                       | C14orf48  |

|              |      |      |                                                                                     |                                                                                                |                |
|--------------|------|------|-------------------------------------------------------------------------------------|------------------------------------------------------------------------------------------------|----------------|
| 240229_at    | 2.08 | 2.23 | G protein-coupled receptor                                                          | NM_014030                                                                                      | GIT1           |
| 64899_at     | 2.07 | 2.27 |                                                                                     | NM_022737                                                                                      |                |
| 212698_s_at  | 2.06 | 3.27 | septin 10                                                                           | NM_144710 ///<br>NM_178584                                                                     | 10-Sep         |
| 221800_s_at  | 2.05 | 1.86 | chromosome 17 open reading<br>frame 70                                              | NM_025161                                                                                      | C17orf70       |
| 226722_at    | 2.04 | 1.86 | family with sequence similarity                                                     | NM_020223                                                                                      | FAM20C         |
| 211269_s_at  | 2.04 | 2.56 | interleukin 2 receptor, alpha                                                       | NM_000417                                                                                      | IL2RA          |
| 1563012_x_at | 2.02 | 1.78 |                                                                                     |                                                                                                |                |
| 217484_at    | 2.00 | 4.18 | complement component<br>(3b/4b) receptor 1 (Knops<br>blood group)                   | NM_000573 ///<br>NM_000651                                                                     | CR1            |
| 225085_at    | 2.00 | 1.88 | ubiquitin specific peptidase 40                                                     | NM_018218                                                                                      | USP40          |
| 222075_s_at  | 1.99 | 2.38 | ornithine decarboxylase<br>antizyme 3                                               | NM_016178                                                                                      | OAZ3           |
| 1566624_at   | 1.98 | 1.77 | solute carrier family 1 (glial<br>high affinity glutamate<br>transporter), member 3 | NM_004172                                                                                      | SLC1A3         |
| 217406_at    | 1.98 | 3.92 |                                                                                     | XM_929562 ///<br>XM_939618                                                                     |                |
| 1570269_at   | 1.98 | 2.40 |                                                                                     |                                                                                                |                |
| 1560706_at   | 1.98 | 3.28 | neural precursor cell<br>expressed, developmentally<br>down-regulated 9             | NM_006403 ///<br>NM_182966                                                                     | NEDD9          |
| 1568745_at   | 1.97 | 2.65 |                                                                                     | XM_933506 ///<br>XM_943630                                                                     |                |
| 243006_at    | 1.96 | 1.91 | FYN oncogene related to SRC,                                                        | NM_002037 ///                                                                                  | FYN            |
| 1569953_at   | 1.95 | 3.60 |                                                                                     |                                                                                                |                |
| 207939_x_at  | 1.94 | 1.81 | RNA binding protein S1, serine-<br>interleukin 2 receptor, alpha                    | NM_006711 ///<br>NM_000417                                                                     | RNPS1<br>IL2RA |
| 206341_at    | 1.94 | 2.28 |                                                                                     |                                                                                                |                |
| 205050_s_at  | 1.92 | 2.10 | mitogen-activated protein<br>kinase 8 interacting protein 2                         | NM_012324 ///<br>NM_016431 ///<br>NM_139124                                                    | MAPK8IP2       |
| 1553626_a_at | 1.90 | 1.78 | chromosome 17 open reading<br>frame 57                                              | NM_152347                                                                                      | C17orf57       |
| 239347_at    | 1.90 | 1.76 |                                                                                     |                                                                                                |                |
| 205898_at    | 1.89 | 2.13 | chemokine (C-X3-C motif)<br>receptor 1                                              | NM_001337                                                                                      | CX3CR1         |
| 213849_s_at  | 1.89 | 2.00 | protein phosphatase 2<br>(formerly 2A), regulatory<br>subunit B, beta isoform       | NM_004576 ///<br>NM_181674 ///<br>NM_181675 ///<br>NM_181676 ///<br>NM_181677 ///<br>NM_181678 | PPP2R2B        |
| 230452_at    | 1.87 | 2.22 |                                                                                     |                                                                                                |                |
| 237764_at    | 1.87 | 1.76 |                                                                                     |                                                                                                |                |
| 229739_s_at  | 1.86 | 2.60 | family with sequence similarity                                                     | NM_001001794                                                                                   | FAM116B        |
| 223291_at    | 1.85 | 3.00 | mitochondrial ribosomal protein<br>S15                                              | NM_031280                                                                                      | MRPS15         |
| 237210_at    | 1.84 | 2.67 | nuclear factor related to                                                           | NM_006165                                                                                      | NFRKB          |
| 215062_at    | 1.84 | 2.78 | formin-like 2                                                                       | NM_052905                                                                                      | FMNL2          |

|              |       |        |                                                                                        |                                                         |                               |
|--------------|-------|--------|----------------------------------------------------------------------------------------|---------------------------------------------------------|-------------------------------|
| 228297_at    | 1.84  | 1.86   | calponin 3, acidic                                                                     | NM_001839                                               | CNN3                          |
| 241216_at    | 1.83  | 2.08   | kinesin family member 1B                                                               | NM_015074 ///<br>NM_183416                              | KIF1B                         |
| 207056_s_at  | 1.82  | 2.00   | solute carrier family 4, sodium bicarbonate cotransporter, member 8                    | NM_001039960<br>/// NM_004858                           | SLC4A8                        |
| 224063_at    | 1.81  | 1.82   | neurolysin (metallopeptidase M3 family)                                                | NM_020726                                               | NLN                           |
| 235635_at    | 1.81  | 2.19   | Rho GTPase activating protein 5                                                        | NM_001030055<br>/// NM_001173                           | ARHGAP5                       |
| 216752_at    | 1.80  | 4.23   | phosphoinositide-3-kinase, family with sequence similarity                             | NM_014602                                               | PIK3R4                        |
| 237583_at    | 1.78  | 3.69   |                                                                                        |                                                         |                               |
| 1562988_at   | 1.78  | 2.06   |                                                                                        | XM_929815 ///<br>XM_937547                              |                               |
| 1553828_at   | 1.78  | 1.76   | peroxidasin homolog (Drosophila)                                                       | NM_152315                                               | FAM55D                        |
| 1564468_at   | 1.76  | 2.14   |                                                                                        | NM_017884                                               |                               |
| 212012_at    | 1.76  | 1.86   |                                                                                        | NM_012293                                               | PXDN                          |
| 243318_at    | 1.75  | 1.89   | WD repeat domain 42A                                                                   | NM_015726                                               | WDR42A                        |
| 240659_x_at  | 1.75  | 2.12   | chromosome 14 open reading frame 106                                                   | NM_018353                                               | C14orf106                     |
| 1569672_at   | 1.74  | 2.84   | oxysterol binding protein-like 6                                                       | NM_032523 ///<br>NM_145739                              | OSBPL6                        |
| 238575_at    | -1.74 | -1.84  |                                                                                        |                                                         |                               |
| 207017_at    | -1.75 | -2.99  | RAB27B, member RAS oncogene family                                                     | NM_001001713<br>/// NM_004163<br>/// NM_007341          | RAB27B                        |
| 228772_at    | -1.76 | -11.53 | histamine N-methyltransferase                                                          | NM_001024074<br>///<br>NM_001024075<br>/// NM_006895    | HNMT                          |
| 202478_at    | -1.76 | -3.33  | tribbles homolog 2 (Drosophila)                                                        | NM_021643                                               | TRIB2                         |
| 1560171_at   | -1.76 | -2.57  | SNF2 histone linker PHD RING helicase                                                  | NM_001042683<br>/// NM_173082                           | SHPRH                         |
| 229202_at    | -1.78 | -1.83  | zinc finger protein 763                                                                | NM_001012753                                            | ZNF763                        |
| 1558755_x_at | -1.78 | -1.86  |                                                                                        |                                                         |                               |
| 1562474_at   | -1.80 | -1.75  | methyltransferase like 7A zinc finger, RAN-binding chromosome 17 open reading frame 91 | NM_014033<br>NM_032143<br>NM_001001870<br>/// NM_032895 | METTL7A<br>ZRANB3<br>C17orf91 |
| 234956_at    | -1.81 | -3.46  |                                                                                        |                                                         |                               |
| 211424_x_at  | -1.81 | -2.38  |                                                                                        |                                                         |                               |
| 242014_at    | -1.85 | -2.93  |                                                                                        |                                                         |                               |
| 214696_at    | -1.85 | -1.80  |                                                                                        |                                                         |                               |
| 204627_s_at  | -1.85 | -2.35  | integrin, beta 3 (platelet glycoprotein IIIa, antigen CD61)                            | NM_000212                                               | ITGB3                         |

|              |       |        |                                                               |                                                                                                                                                                                                      |          |
|--------------|-------|--------|---------------------------------------------------------------|------------------------------------------------------------------------------------------------------------------------------------------------------------------------------------------------------|----------|
| 243032_at    | -1.85 | -2.07  |                                                               | NM_015553                                                                                                                                                                                            |          |
| 230904_at    | -1.90 | -1.91  | <i>fibronectin type III and SPRY domain containing 1-like</i> | NM_031919 ///<br>NM_207647                                                                                                                                                                           | FSD1L    |
| 1569013_s_at | -1.91 | -1.80  |                                                               | XM_497054 ///<br>XM_926051 ///<br>XM_929002 ///<br>XM_930920 ///<br>XM_930928 ///<br>XM_933343 ///<br>XM_933346 ///<br>XM_933352 ///<br>XM_933364 ///<br>XM_933367 ///<br>XM_933371 ///<br>XM_933373 |          |
| 238307_at    | -1.92 | -2.06  |                                                               |                                                                                                                                                                                                      |          |
| 206932_at    | -1.93 | -3.22  | <i>cholesterol 25-hydroxylase</i>                             | NM_003956                                                                                                                                                                                            | CH25H    |
| 1560023_x_at | -1.95 | -1.85  |                                                               |                                                                                                                                                                                                      |          |
| 234805_at    | -1.96 | -1.94  | <i>ATPase family, AAA domain containing 1</i>                 | NM_032810                                                                                                                                                                                            | ATAD1    |
| 227151_at    | -1.97 | -2.94  | <i>sorting nexin 33</i>                                       | NM_153271                                                                                                                                                                                            | SNX33    |
| 1565898_at   | -1.98 | -2.18  | <i>methyltransferase 5 domain containing 1</i>                | NM_152636                                                                                                                                                                                            | METT5D1  |
| 233627_at    | -1.99 | -4.04  | <i>megakaryoblastic leukemia</i>                              | NM_020831                                                                                                                                                                                            | MKL1     |
| 1556697_at   | -2.00 | -15.95 | <i>GPRIN family member 3</i>                                  | NM_198281                                                                                                                                                                                            | GPRIN3   |
| 240557_at    | -2.02 | -1.82  | <i>TSC22 domain family, member 2</i>                          | NM_014779                                                                                                                                                                                            | TSC22D2  |
| 228715_at    | -2.03 | -3.24  | <i>zinc finger, CCHC domain containing 12</i>                 | NM_173798                                                                                                                                                                                            | ZCCHC12  |
| 235823_at    | -2.07 | -5.81  | <i>acyl-CoA synthetase family member 3</i>                    | NM_174917                                                                                                                                                                                            | ACSF3    |
| 234168_at    | -2.09 | -2.04  | <i>TAF15 RNA polymerase II, TATA box binding protein</i>      | NM_003487 ///<br>NM_139215                                                                                                                                                                           | TAF15    |
| 209298_s_at  | -2.11 | -2.15  | <i>intersectin 1 (SH3 domain protein)</i>                     | NM_001001132<br>/// NM_003024                                                                                                                                                                        | ITSN1    |
| 203910_at    | -2.11 | -3.05  | <i>Rho GTPase activating protein 29</i>                       | NM_004815                                                                                                                                                                                            | ARHGAP29 |
| 235218_x_at  | -2.16 | -1.84  | <i>THAP domain containing 6</i>                               | NM_144721                                                                                                                                                                                            | THAP6    |
| 235044_at    | -2.18 | -2.02  | <i>cysteine/tyrosine-rich 1</i>                               | NM_052954                                                                                                                                                                                            | CYYR1    |
| 231071_at    | -2.20 | -1.75  |                                                               |                                                                                                                                                                                                      |          |
| 227529_s_at  | -2.22 | -2.12  | <i>A kinase (PRKA) anchor</i>                                 | NM_005100 ///                                                                                                                                                                                        | AKAP12   |
| 238483_at    | -2.23 | -1.93  |                                                               |                                                                                                                                                                                                      |          |
| 203431_s_at  | -2.24 | -2.26  |                                                               | NM_014715                                                                                                                                                                                            |          |
| 231929_at    | -2.25 | -1.75  |                                                               |                                                                                                                                                                                                      |          |
| 220103_s_at  | -2.28 | -9.75  | <i>mitochondrial ribosomal protein S18C</i>                   | NM_016067                                                                                                                                                                                            | MRPS18C  |
| 217537_x_at  | -2.29 | -4.05  |                                                               |                                                                                                                                                                                                      |          |
| 237494_at    | -2.32 | -2.10  |                                                               |                                                                                                                                                                                                      |          |
| 1569830_at   | -2.35 | -1.93  | <i>protein tyrosine phosphatase,</i>                          | NM_002838 ///                                                                                                                                                                                        | PTPRC    |

|              |       |        |                                                                                     |                               |          |
|--------------|-------|--------|-------------------------------------------------------------------------------------|-------------------------------|----------|
| 222558_at    | -2.38 | -1.89  |                                                                                     | NM_018170                     |          |
| 215641_at    | -2.39 | -1.80  | SEC24 related gene family, member D ( <i>S. cerevisiae</i> )                        | NM_014822                     | SEC24D   |
| 1558345_a_at | -2.39 | -1.82  |                                                                                     |                               |          |
| 219944_at    | -2.40 | -1.79  | CAP-GLY domain containing linker protein family, member 4                           | NM_024692                     | CLIP4    |
| 242868_at    | -2.41 | -1.87  | endothelial PAS domain protein 1                                                    | NM_001430                     | EPAS1    |
| 1552425_a_at | -2.42 | -1.93  | kelch-like 10 ( <i>Drosophila</i> )                                                 | NM_152467                     | KLHL10   |
| 235386_at    | -2.44 | -1.82  |                                                                                     |                               |          |
| 1554170_a_at | -2.58 | -1.78  |                                                                                     | NM_203397                     |          |
| 1561133_at   | -2.61 | -2.16  | SAR1 gene homolog B ( <i>S. cerevisiae</i> )                                        | NM_001033503<br>/// NM_016103 | SAR1B    |
| 206390_x_at  | -2.62 | -5.78  | platelet factor 4 (chemokine (C-X-C motif) ligand 4)                                | NM_002619                     | PF4      |
| 235869_at    | -2.62 | -10.07 | short coiled-coil protein                                                           | NM_032547                     | SCOC     |
| 206618_at    | -2.62 | -1.77  | interleukin 18 receptor 1                                                           | NM_003855                     | IL18R1   |
| 238439_at    | -2.69 | -1.75  | ankyrin repeat domain 22                                                            | NM_144590                     | ANKRD22  |
| 239351_at    | -2.69 | -1.95  |                                                                                     |                               |          |
| 204666_s_at  | -2.71 | -2.41  | cold shock domain containing torsin A interacting protein 2                         | NM_025073                     | CSDE1    |
| 1569676_at   | -2.78 | -2.19  | protein tyrosine phosphatase-like (proline instead of catalytic arginine), member A | NM_145034                     | TOR1AIP2 |
| 237664_at    | -2.79 | -1.97  |                                                                                     | NM_014241                     | PTPLA    |
| 1564331_at   | -2.80 | -3.86  |                                                                                     | XM_091914                     |          |
| 1553940_a_at | -2.81 | -3.29  | leucine rich repeat containing 28                                                   | NM_144598                     | LRRC28   |
| 214294_at    | -2.85 | -3.63  |                                                                                     |                               |          |
| 236223_s_at  | -2.86 | -2.54  | Ras-like without CAAX 1                                                             | NM_006912                     | RIT1     |
| 1558983_at   | -2.88 | -1.87  | leucine rich repeat containing 41                                                   | NM_006369                     | LRRC41   |
| 229316_at    | -2.90 | -6.03  | chromosome 19 open reading frame 50                                                 | NM_024069                     | C19orf50 |
| 201108_s_at  | -2.97 | -2.06  | thrombospondin 1                                                                    | NM_003246                     | THBS1    |
| 212641_at    | -3.00 | -1.78  | human immunodeficiency virus type 1 enhancer binding protein 2                      | NM_006734                     | HIVEP2   |
| 234071_at    | -3.06 | -2.97  | DEP domain containing 6                                                             | NM_022783                     | DEPDC6   |
| 1558208_at   | -3.16 | -3.16  | TAR DNA binding protein                                                             | NM_007375                     | TARDBP   |
| 206537_at    | -3.38 | -2.51  |                                                                                     |                               |          |
| 231997_at    | -3.51 | -1.89  | tubulin folding cofactor E-like                                                     | NM_152715                     | TBCEL    |

|             |       |        |                                                                               |                                                                                                                                                                                                                                                                          |         |
|-------------|-------|--------|-------------------------------------------------------------------------------|--------------------------------------------------------------------------------------------------------------------------------------------------------------------------------------------------------------------------------------------------------------------------|---------|
| 1564474_at  | -3.54 | -2.89  |                                                                               | XM_211988 ///<br>XM_933335 ///<br>XM_933337 ///<br>XM_933341 ///<br>XM_933350 ///<br>XM_933356 ///<br>XM_933360 ///<br>XM_933363 ///<br>XM_943735 ///<br>XM_943738 ///<br>XM_943741 ///<br>XM_943744 ///<br>XM_943747 ///<br>XM_943750 ///<br>XM_943754 ///<br>XM_943757 |         |
| 213260_at   | -3.78 | -1.94  |                                                                               |                                                                                                                                                                                                                                                                          |         |
| 230422_at   | -3.97 | -16.25 | formyl peptide receptor-like 2                                                | NM_002030                                                                                                                                                                                                                                                                | FPRL2   |
| 231992_x_at | -4.34 | -1.80  |                                                                               | NR_002933                                                                                                                                                                                                                                                                |         |
| 205624_at   | -4.41 | -2.01  | carboxypeptidase A3 (mast cell)                                               | NM_001870                                                                                                                                                                                                                                                                | CPA3    |
| 243886_at   | -4.46 | -2.18  |                                                                               | NM_001017927                                                                                                                                                                                                                                                             |         |
| 229485_x_at | -4.53 | -2.74  | shisa homolog 3 ( <i>Xenopus laevis</i> )                                     | XM_496688 ///<br>XM_941105                                                                                                                                                                                                                                               | SHISA3  |
| 1566902_at  | -4.69 | -2.00  | low density lipoprotein receptor-related protein 8, apolipoprotein e receptor | NM_001018054<br>/// NM_004631<br>/// NM_017522<br>/// NM_033300                                                                                                                                                                                                          | LRP8    |
| 234897_s_at | -4.94 | -4.81  | chromosome 6 open reading frame 21                                            | NM_001003693                                                                                                                                                                                                                                                             | C6orf21 |
| 1554309_at  | -5.03 | -2.48  | eukaryotic translation initiation                                             | NM_003760                                                                                                                                                                                                                                                                | EIF4G3  |
| 207125_at   | -5.41 | -2.35  | zinc finger protein 225                                                       | NM_013362                                                                                                                                                                                                                                                                | ZNF225  |
| 1552734_at  | -5.42 | -2.96  |                                                                               | NM_152756                                                                                                                                                                                                                                                                |         |
| 217552_x_at | -5.56 | -2.11  | complement component (3b/4b) receptor 1 (Knops blood group)                   | NM_000573 ///<br>NM_000651                                                                                                                                                                                                                                               | CR1     |
| 233416_at   | -5.88 | -3.09  |                                                                               |                                                                                                                                                                                                                                                                          |         |
| 204654_s_at | -6.13 | -2.02  | transcription factor AP-2 alpha (activating enhancer binding protein 2 alpha) | NM_001032280<br>///<br>NM_001042425<br>/// NM_003220                                                                                                                                                                                                                     | TFAP2A  |
| 242170_at   | -6.26 | -3.72  | zinc finger protein 154                                                       |                                                                                                                                                                                                                                                                          | ZNF154  |
| 215124_at   | -6.33 | -13.23 | zinc finger protein 550                                                       | NM_001039654                                                                                                                                                                                                                                                             | ZNF550  |
| 236344_at   | -7.20 | -2.14  |                                                                               |                                                                                                                                                                                                                                                                          |         |
| 240845_at   | -7.21 | -2.66  | ecotropic viral integration site 5                                            | NM_005665                                                                                                                                                                                                                                                                | EVI5    |



|             |        |        |                                                             |                                                                                                                                                   |          |
|-------------|--------|--------|-------------------------------------------------------------|---------------------------------------------------------------------------------------------------------------------------------------------------|----------|
| 207973_x_at | -8.08  | -13.98 | acrosomal vesicle protein 1                                 | NM_001612 ///<br>NM_020069 ///<br>NM_020107 ///<br>NM_020108 ///<br>NM_020109 ///<br>NM_020110 ///<br>NM_020111 ///<br>NM_020113 ///<br>NM_020115 | ACRV1    |
| 1553020_at  | -8.53  | -1.86  | Smith-Magenis syndrome<br>chromosome region, candidate<br>5 |                                                                                                                                                   | SMCR5    |
| 222722_at   | -9.74  | -6.33  | osteoglycin                                                 | NM_014057 ///<br>NM_024416 ///<br>NM_033014                                                                                                       | OGN      |
| 220811_at   | -11.90 | -2.46  | proteoglycan 3                                              | NM_006093                                                                                                                                         | PRG3     |
| 239381_at   | -11.93 | -1.79  | kallikrein-related peptidase 7                              | NM_005046 ///<br>NM_139277                                                                                                                        | KLK7     |
| 1559623_at  | -12.13 | -5.83  | chromosome 11 open reading<br>frame 54                      | NM_014039                                                                                                                                         | C11orf54 |
| 217687_at   | -13.40 | -5.68  | adenylate cyclase 2 (brain)                                 | NM_020546                                                                                                                                         | ADCY2    |
| 1564760_at  | -15.94 | -5.18  |                                                             |                                                                                                                                                   |          |
| 219788_at   | -18.54 | -10.56 | paired immunoglobulin-like type                             | NM_013439 ///                                                                                                                                     | PILRA    |
| 233051_at   | -31.12 | -4.00  | SLIT and NTRK-like family,<br>member 2                      | NM_032539                                                                                                                                         | SLITRK2  |

---
